# Supplementary material for: Grapevine genome analysis demonstrates the role of gene copy number variation in the formation of monoterpenes
Source: Front Plant Sci. 2023 Mar 16;14:1112214. doi: 10.3389/fpls.2023.1112214 (PMC10061021; doi:10.3389/fpls.2023.1112214)
Supplement: Supplementary file 2 [file Table_1.xlsx]

## Sheet: S1
Table S1 Primers and probes used in the VvDXS1 SNP genotyping assay.
Primer/Probe	Sequence
Forward primer	ATCAAACAGACCTCTTAGAGAATTACGA
Reverse primer	CCATGTTCACTTTGGGATAATAACAA
Probe Allele G	FAM-TTGCCAAGGTTAGTATT-NFQ
Probe Allele T	VIC-AGGTTGCCAATGTTA-NFQ

## Sheet: S2
Table S2: Primers used for characterisation of VvTer and VvGer
Gene	5’-primer	3’-primer	Use	Reference
VvGer	ATGGCTTTGAATATGAGCAGG	CTAATGCATGGTAATTTGAGCAT	PCR isolation	This study
	ACGCGTCGAGTATAGAATGCTACA	TATGTGTTTCCTGCAGGCTTCA	qPCR	This study
VvTer	ATGGCTCTTTCCATGCTTGC	TAATTCAGAACTCAAGCTGGGA	PCR isolation	This study
	AGAGTCTCCATTCCCTGAAACA	GGGCTCAACGAGTAATGACAA	qPCR	Matarese et al (2013)
VvActin	CCCTCGTCTGTGACAATGGA	CATCATCACCCGCAAATCC	qPCR	This study

## Sheet: S3
Table S3: Relative concentrations (μg.g¯¹ FW) of VOCs identified in a mapping population (Deckrot x G1-7720)
		Alcohol	Alcohol	Alcohol	Alcohol	Alcohol	Alcohol	Ketone	Ketone	Ketone	Aldehyde	Aldehyde	Aldehyde	Aldehyde	Aldehyde	Aldehyde	Aldehyde	Aldehyde	Aldehyde	Aldehyde	Ester	Ester	Norisoprenoid	Norisoprenoid	Norisoprenoid	Norisoprenoid	Monoterpene	Monoterpene	Monoterpene	Monoterpene	Monoterpene	Monoterpene	Monoterpene	Monoterpene	Monoterpene	Monoterpene	Monoterpene	Monoterpene	Monoterpene	Monoterpene	Monoterpene	Monoterpene	Monoterpene	Monoterpene	Sesquiterpene	Sesquiterpene	Sesquiterpene	Sesquiterpene	Sesquiterpene
Name	Stage	3-Hexen-1-ol, (E)-	Cyclohexanol	1-Hexanol	3-Hexanol	1-Octen-3-ol	2-Octen-1-ol, (Z)-	3-Buten-2-one, 3-methyl-	1-Penten-3-one	1-Octen-3-one	Pentanal	Trans-2-pentenal	Hexanal	trans-2-Hexenal	Heptanal	2-Heptenal, (E)-	2-Octenal, (E)-	Decanal	2-Decenal, (E)-	Nonanal	Benzoic acid, 2-hydroxy-, methyl ester	Salicylic acid	6-Methyl-5-hepten-2-one	Beta-Ionone	Geranyl acetone	B-Damascenone	Alpha-terpinene	para-Cymene	Limonene	1,8-Cineole	trans-beta-Ocimene	Gamma-Terpinene	Linalool Oxide	alpha-terpinolene	Linalool	cis-Rose oxide	Nerol oxide	p-mentha-1,5-dien-8-ol	Terpinene-4-ol	Alpha-Terpineol	Beta-Citronellol/Nerol	Geraniol	E-Citral	Beta-Myrcene	Alpha-Cubebene	Alpha-Ylangene	Alpha-Copaene	Beta-Bourbonene	trans-Caryophyllene
Deckrot	2021	0.0254312	0.110062	0.0845875	0.001525	0.0287875	0.0023875	0.0001375	0.006775	0.00875	0.00368125	0.0039625	0.156169	0.485713	0.0085625	0.0233437	0.0166	0.00293125	0.00905625	0.0360625	0.006325		0.006625	0.00695625	0.00339375	0.0067	0.001675	0.00495	0.00168125		0.00060625	0.0054625	0.0019625	0.0011625	0.0054	0		0	0.0021	0.0037875	0.00183125	0.00444375	0.042825	0.00218125	0	0.00108125		0.0010875	0.00093125
DG_001	2021	0.0770631	0.362555	0.266138	0	0.0295374	0.00274596	0	0.00832599	0.0176946	0.00502203	0.00376652	0.148781	0.50525	0.00688693	0.027188	0.0202276	0.00367841	0.00792217	0.0337518	0.0024743	0	0.0251762	0.00195301	0.000234949	0.00832599	0.00458884	0.019486	0.0160499	0	0.0131791	0.00865639	0.0106167	0.005558	0.121123	0.000660793	0	0.000580029	0.00831131	0.0645081	0.0396549	0.148333	0.0238913	0.0380029	0	0.00108664	0	0.00223201	0
DG_002	2021	0.106587	0.238042	0.181455	0	0.0232971	0.00198504	0.00242692	0.0174371	0.031346	0.00826649	0.00848402	0.108083	0.18138	0.0149354	0.0414616	0.0299456	0.00384772	0.00602311	0.0356084	0.000435078	0	0.0497077	0.00309993	0.00130523	0.00625425	0.00896669	0.0284908	0.0190007	0	0.0175867	0.0145343	0.00703603	0.00900068	0.15259	0.000734194	0	0.00099932	0.013467	0.057172	0.0341876	0.20915	0.0310741	0.0491638	0.000265126	0.000897349	0	0.000373895	0.000183549
DG_007	2021	0.0637694	0.161023	0.111395	0.00238066	0.0415127	0.00226906	0.000601364	0.0224551	0.0180037	0.0066212	0.0141414	0.133658	0.526156	0.0112523	0.0478611	0.03	0.00391197	0.00957843	0.0530316	0.00125232	0	0.0194048	0.00616863	0.00889027	0.00644141	0.0118475	0.0260322	0.0099814	0	0.00902666	0.019504	0.00360818	0.0101984	0.0524241	0	0	0.000694358	0.0112957	0.0288593	0.0184501	0.114427	0.0220087	0.0217111	0.00275263	0.0242529	0	0.0311469	0.00154371
DG_023	2021	0.03584	0.324315	0.229411	0.00291383	0.0324427	0.00228146	0.000254185	0.00725356	0.00780533	0.00395536	0.00466832	0.137161	0.270285	0.0110539	0.0270614	0.0179851	0.00373838	0.0032796	0.0413949	0.00176069	0	0.00896466	0.00386237	0.00236826	0.00615623	0.00269064	0.00922505	0.00251705	0	0.00231866	0.006646	0.00210787	0.00133292	0.0124675	0	0	0	0.00272164	0.00364538	0.00761934	0.0310973	0.0107192	0.0066088	0	0.00066336	0	0	0
DG_028	2021	0.085426	0.285855	0.187301	0.00276755	0.0341854	0.00145876	0.000538514	0.0118064	0.0122495	0.009182	0.00777096	0.132849	0.357716	0.0121132	0.0416769	0.0278732	0.00422631	0.0058214	0.0510089	0.0143626	0	0.0122427	0.00816633	0.00611452	0.0110089	0.000415815	0.00233129	0.00130879	0	0.00120654	0.00572597	0.00213361	0.000408998	0.00805726	0	0	0	0.000497614	0.00231766	0.00259714	0.00895024	0.0110566	0.00310838	0.00220859	0.0200545	0	0.0170961	0.00139741
DG_030	2021	0.135449	0.193377	0.189192	0.00299724	0.0287638	0.00100138	0.00156768	0.014779	0.0122928	0.010518	0.0121409	0.12788	0.374751	0.0135773	0.0445304	0.0310635	0.00332873	0.00801796	0.0377417	0.0125898	0	0.0318785	0.00747238	0.0154144	0.012576	0.00417818	0.0106008	0.00850829	0	0.0104213	0.00996547	0.00315608	0.00411602	0.0802831	0.00160221	0	0	0.00323895	0.0154144	0.0352279	0.129517	0.01625	0.0286671	0.00469613	0.0308218	0	0.0407942	0.00359116
DG_032	2021	0.16224	0.432724	0.279364	0	0.0209465	0.00145954	0.000354046	0.00153179	0.00850434	0.00141618	0.00132225	0.0946171	0.549061	0.00405347	0.0178685	0.013013	0.00265173	0.0041763	0.0261344	0.0411488	0	0.0204913	0.00289017	0.0154118	0.00293353	0.00618497	0.0132298	0.0127529	0	0.0186633	0.00895954	0.00276012	0.00521676	0.114538	0.000845376	0	0.000816474	0.00720376	0.0301084	0.0470376	0.326727	0.0289379	0.0480636	0.00358382	0.0455853	0	0.0938945	0.00458092
DG_034	2021	0.0990426	0.115201	0.0563125	0	0.0146695	0.000901791	0.00151946	0.00518839	0.02063	0.005979	0.00222977	0.0622792	0.304416	0.0055034	0.0251575	0.0150216	0.0018777	0.00525633	0.0337554	0.000525015	0	0.0545584	0.00104385	0.00107474	0.00960469	0.00117356	0.00558369	0.00349599	0	0.00260037	0.0029895	0.00395923	0.00118592	0.0331748	0.000271773	0	0.000197653	0.0013218	0.00918468	0.00351452	0.0181779	0.0104756	0.0100926	0.000135886	0.00176035	0	0.00244595	0.000265596
DG_037	2021	0.118494	0.319275	0.241269	0	0.0335983	0.0041841	0.00027894	0.0112343	0.0288494	0.00621339	0.00579498	0.146339	0.544721	0.0113668	0.0372245	0.0296722	0.0058159	0.00701534	0.0861855	0.00491632	0	0.0242887	0.00299861	0.0161367	0.00593445	0.0103208	0.0255091	0.0311018	0	0.0469247	0.0158229	0.00622734	0.0101674	0.165704	0.00165272	0	0.00107392	0.0174965	0.070781	0.157357	0.89007	0.0861855	0.122894	0.000432357	0.00651325	0	0.0067643	0.000564854
DG_038	2021	0.0929245	0.0872351	0.101589	0	0.0222279	0.00155298	0.000341074	0.00479681	0.0100943	0.00365022	0.00187954	0.089775	0.462163	0.00407837	0.0187228	0.0114949	0.00214804	0.00542816	0.0401089	0.00645864	0	0.018135	0.000689405	0.000399129	0.0108418	0.00353411	0.0128592	0.00859216	0	0.0065312	0.00629173	0.00739478	0.00421626	0.0805007	0.00525399	0	0.000732946	0.00645138	0.0302975	0.0481858	0.0827141	0.0195501	0.0195428	0	0.00103774	0	0.0013135	0.000188679
DG_041	2021	0.154923	0.251437	0.151216	0	0.0217193	0.00108798	0.000228341	0.0160175	0.0144056	0.00282069	0.00705171	0.12041	0.267293	0.0108328	0.0251847	0.019597	0.0043049	0.00717931	0.0491874	0.00278039	0	0.00546676	0.00378778	0.00018133	0.00866353	0.000644728	0.00490262	0.000967092	0	0.000402955	0.0035863	0.00108798	0.000449966	0.00280054	8.0591e-05	0	0.000127602	0.00126259	0.00260578	0.000638012	0.00167898	0.00423774	0.00137676	0	0.000564137	0	0.000402955	0
DG_042	2021	0.11912	0.545674	0.440536	0	0.0389409	0.00378267	0.00147868	0.0108666	0.0314718	0.0130193	0.00570151	0.287345	0.641878	0.0145942	0.054553	0.0355708	0.00499312	0.0171045	0.0738927	0.00216644	0	0.0358941	0.00283356	0.0239615	0.0117194	0.00482118	0.00951857	0.0059216	0	0.00525447	0.0117056	0.00436726	0.00503439	0.0653301	0.000866575	0	0.00138239	0.00876204	0.0387758	0.0678886	0.223012	0.0425172	0.0158184	0	0.000288858	0	0	0.000295736
DG_046	2021	0.190364	0.217436	0.157079	0	0.0241507	0.00222736	0.000793126	0.0107403	0.026193	0.00419035	0.0055651	0.133325	0.462267	0.0139128	0.0314078	0.0241044	0.00509584	0.00777264	0.0821745	0.000264375	0	0.0282882	0.00384666	0.000608063	0.00583609	0.000846001	0.00504296	0.0020423	0	0.000925314	0.00388632	0.00327165	0.000832783	0.0127495	0.000125578	0	0	0.000984798	0.00507601	0.000693985	0.00282221	0.00504957	0.00367482	0	0.000389954	0	0	0
DG_047	2021	0.0585535	0.164258	0.144991	0.00160927	0.0300877	0.00180338	0.000613651	0.0187915	0.0156794	0.00386349	0.0101628	0.219086	0.356036	0.012248	0.0335441	0.0229931	0.00315592	0.0074139	0.041221	0.00086412	0	0.0180213	0.00559173	0.00586725	0.00882905	0.0108078	0.0270632	0.0249468	0	0.0291046	0.0145398	0.00423294	0.0106637	0.0877395	0.00662492	0	0.000976832	0.00726988	0.0293801	0.166838	0.327871	0.0511083	0.0742329	0.00217282	0.00140263	0	0	0.000732624
DG_052	2021	0.166414	0.27965	0.314362	0.00379935	0.0484207	0.0036699	0.00177994	0.0176893	0.0113657	0.0133139	0.0236893	0.163197	0.268531	0.0202913	0.060945	0.0370939	0.00537864	0.00976699	0.0468414	0.000964401	0	0.0266861	0.0145761	0.0101812	0.0106926	0.00101618	0.00397411	0.00255016	0	0.00173463	0.00809709	0.00292557	0.000705502	0.0124466	0	0	0	0.000983819	0.00291262	0.00372816	0.0195081	0.0142265	0.00645307	0.00111327	0.018932	0	0.0230227	0.000970874
DG_055	2021	0.206952	0.473853	0.505015	0	0.0376851	0.0072061	0.00187954	0.0177649	0.0397025	0.00592163	0.0125617	0.335319	0.678955	0.0128084	0.0614586	0.0525109	0.0116328	0.0161611	0.0634543	0	0	0.00511611	0.0179826	0.00849057	0.0138099	0.00214078	0.00743832	0.00263425	0	0.00195936	0.0100508	0.00219158	0.00126996	0.00707547	0	0	0	0.00370827	0.00529028	0.00255443	0.0180479	0.017373	0.00708999	0	0.00102322	0	0	0
DG_060	2021	0.0983089	0.464451	0.245974	0	0.0323133	0.00234261	0.000446559	0.0109883	0.0375769	0.00814056	0.00662518	0.122731	0.490322	0.0125769	0.0512958	0.0306369	0.00469253	0.0132064	0.0471669	0.0136676	0	0.0289458	0.00234993	0.000783309	0.00885798	0.00404832	0.0139019	0.0143119	0	0.0184627	0.00846999	0.00267204	0.0040776	0.0928111	0.000387994	0	0.000307467	0.00524158	0.0289971	0.0535798	0.396552	0.0358712	0.0505198	0.000322108	0.00527086	0	0.00867496	0.00109078
DG_062	2021	0.119394	0.420275	0.254205	0	0.0192705	0.00189264	0	0.00456986	0.0111425	0.00310392	0.00224363	0.120358	0.546786	0.00518926	0.0156573	0.0114659	0.00302822	0.00496215	0.0430833	0.0089883	0	0.0167791	0.00220234	0.00239504	0.00965588	0.00421886	0.0126635	0.0264487	0	0.0417412	0.00575361	0.00695802	0.00732966	0.270461	0.00288369	0	0.000350998	0.00187199	0.0579972	0.1019	0.68563	0.0305643	0.11073	0.000578114	0.00565038	0	0.00697178	0.00199587
DG_004	2021	0.0915842	0.211609	0.173294	0	0.0170131	0.00165936	0.000319349	0.0164058	0.0173513	0.00257984	0.00614903	0.153575	0.238535	0.0110958	0.0237946	0.0185348	0.00345648	0.0063995	0.0381027	0.000413275	0	0.0139762	0.00236694	0.000369443	0.00475892	0.0066938	0.0221791	0.0219286	0	0.021196	0.00925485	0.0022918	0.0058923	0.0640388	0.00372574	0	0.000500939	0.00591108	0.0231684	0.134358	0.267658	0.0458547	0.0630244	0.000131497	0.000413275	0	0.000369443	0.000112711
DG_063	2021	0.0399179	0.309829	0.198461	0.00294802	0.0405472	0.00361833	0.00114227	0.00936389	0.0157866	0.013632	0.00863201	0.142182	0.293399	0.0177018	0.0421546	0.0271341	0.00426129	0.00995212	0.0899042	0.000745554	0	0.0260534	0.00616279	0.0135773	0.00899453	0.00535568	0.0175718	0.00564295	0	0.00288646	0.0122914	0.0047948	0.00461696	0.0224966	0.000663475	0	0.000738714	0.005342	0.0156019	0.0113064	0.0292955	0.0158482	0.00950068	0	0.00119015	0	0	0
DG_071	2021	0.133999	0.569906	0.368127	0	0.0202603	0.00148228	0.000607375	0.0115546	0.0186479	0.00570499	0.00608821	0.149826	0.448778	0.0116197	0.0276428	0.0207448	0.00456978	0.0119957	0.051222	0.00314534	0	0.0219378	0.00177151	0.00065799	0.00743312	0.00885033	0.0253218	0.0209834	0	0.029906	0.0147939	0.00455531	0.00852495	0.136739	0.0012509	0	0.000860448	0.0134273	0.0475416	0.100991	0.531048	0.0478163	0.0732176	0.000260304	0.0012726	0	0.00119306	0
DG_074	2021	0.0552033	0.109593	0.190359	0.00268293	0.0270257	0.00128049	0.000772358	0.00966125	0.0137466	0.0051626	0.00510163	0.124228	0.328103	0.0106165	0.0323238	0.0212602	0.00278455	0.00616531	0.0411111	0.000616531	0	0.0205691	0.00443089	0.00743902	0.00843496	0.0112873	0.0307995	0.0162737	0	0.0123306	0.0168293	0.00381436	0.00944444	0.0899255	0.0177913	0	0.00183604	0.0107588	0.0329201	0.10143	0.134458	0.0432791	0.033916	0	0.000413279	0	0	0
DG_081	2021	0.139782	0.350953	0.30224	0	0.0519129	0.00471069	0.00089857	0.00814159	0.0561947	0.00292035	0.00105514	0.221402	0.552001	0.00948264	0.0626276	0.0315112	0.00522124	0.0147856	0.0605378	0.000251872	0	0.00748809	0.00275017	0.00599728	0.0104629	0.00131382	0.00552757	0.00187883	0	0.00161334	0.00543907	0.0027774	0.00079646	0.00778761	0	0	0	0.00230088	0.00511913	0.00535058	0.0254391	0.0136828	0.00604493	0	0	0	0	0
DG_082	2021	0.199993	0.253112	0.328696	0.00272602	0.0595514	0.00590062	0.00207039	0.0227674	0.0336646	0.0185714	0.0197239	0.179096	0.468295	0.026156	0.0848309	0.0525604	0.00449965	0.0202277	0.111311	0.000731539	0	0.0355349	0.0101104	0.0148309	0.00707384	0.00226363	0.00715666	0.00300207	0	0.00162871	0.0134231	0.00343685	0.00178054	0.022588	0	0	0.000351967	0.00260179	0.00764665	0.00207039	0.0129814	0.0118772	0.00552795	0	0	0	0	0
DG_085	2021	0.297867	0.34159	0.599403	0	0.0224614	0.0017505	0.00133467	0.0125419	0.024326	0.00628437	0.00937626	0.174527	0.179604	0.0159222	0.0378672	0.0325687	0.00451375	0.00858484	0.0522602	0	0	0.00429913	0.00523139	0.00385647	0.0184172	0.00274313	0.00982562	0.00255533	0	0.00238766	0.00589537	0.00255533	0.00232059	0.0126895	0	0	0	0.0047552	0.0130986	0.000865191	0.00963783	0.00853789	0.00830315	0	0	0	0	0
DG_086	2021	0.117432	0.189987	0.292257	0.00247525	0.0416304	0.00285149	0.000653465	0.0331815	0.0409505	0.0117162	0.0184686	0.175974	0.323221	0.0205479	0.077868	0.0513795	0.00485149	0.0169241	0.0582772	0.000290429	0	0.0315842	0.00836964	0.0126535	0.0102574	0.00483168	0.0108581	0.0128845	0	0.0200792	0.0137492	0.00419142	0.00593399	0.110125	0.00114191	0	0	0.00333993	0.0223432	0.0511089	0.286502	0.0333399	0.0519538	0	0	0	0.00144554	0.00020462
DG_087	2021	0.0921088	0.173265	0.253367	0.00251701	0.040517	0.00293197	0.000748299	0.0137755	0.0109728	0.00821088	0.0109864	0.225565	0.447095	0.012932	0.0487687	0.0318027	0.00301361	0.00684354	0.0391293	0.00446939	0	0.0251565	0.00552381	0.00797959	0.00876871	0.0325102	0.0671156	0.025517	0	0.0175646	0.0446939	0.00693878	0.0268844	0.0788503	0.00264626	0	0.00418367	0.029381	0.0722381	0.0963878	0.199871	0.037449	0.0410476	0.00206122	0.0095102	0	0.00357823	0.000959184
DG_089	2021	0.0622453	0.209079	0.169805	0.00283582	0.0434588	0.00256976	0.000856587	0.0103504	0.0191434	0.00889033	0.0073329	0.101791	0.31148	0.0152888	0.050318	0.0301622	0.00471123	0.0105581	0.0657365	0.000992862	0	0.0133225	0.00719663	0.00628812	0.010928	0.00519792	0.016963	0.00373783	0	0.00155094	0.0123297	0.00271901	0.002427	0.0108112	0	0	0	0.00595068	0.00632057	0.00482154	0.0118624	0.00993511	0.00450357	0	0	0	0	0.000493186
DG_091	2021	0.0637318	0.256741	0.241001	0.00239055	0.0358721	0.00358582	0.000632384	0.013009	0.0140375	0.00622655	0.00804726	0.193322	0.614281	0.0110563	0.0317929	0.0209173	0.0042877	0.00848506	0.0849896	0.036713	0	0.00995136	0.00987491	0.00554552	0.00869354	0.00130646	0.00481584	0.00154274	0	0.00105629	0.0061918	0.00216122	0.000847811	0.00891591	0	0	0	0.00172342	0.00362057	0.00183461	0.0113621	0.0181862	0.00320361	0	0.00218207	0	0.00147325	0
DG_094	2021	0.0464373	0.0939305	0.0889101	0.00285422	0.0417098	0.00262262	0.000858311	0.0123093	0.0118324	0.00910082	0.0129496	0.124237	0.394584	0.0138692	0.0489033	0.0275409	0.00323569	0.0072139	0.0692847	0.000756131	0	0.0223229	0.00344687	0.00752725	0.00820163	0.0150886	0.033079	0.0122956	0	0.00908038	0.0241213	0.00708447	0.0117643	0.0643392	0.000776567	0	0.00173025	0.015327	0.0357357	0.0246662	0.111744	0.0215395	0.0232016	0	0	0	0	0
DG_097	2021	0.059967	0.11844	0.0680238	0.00182419	0.0230139	0.00159947	0.000588235	0.0037343	0.00727032	0.00499009	0.00259088	0.0664177	0.350661	0.00392597	0.0208063	0.0127759	0.00162591	0.00333113	0.0155453	0.000502313	0	0.013807	0.00501652	0.0108394	0.0121084	0.0141044	0.0313615	0.00575017	0	0.00123596	0.0211963	0.0024653	0.00779907	0.00962987	0	0	0.000879048	0.0122604	0.0152479	0.00272307	0.00693325	0.0462723	0.00321216	0	0	0	0	0
DG_098	2021	0.0406601	0.157163	0.153288	0.0025817	0.0542941	0.00509804	0.000379085	0.014281	0.0280392	0.00728105	0.00761438	0.155562	0.635791	0.0163595	0.0536928	0.0366471	0.00555556	0.00895425	0.0752745	0.00289542	0	0.0117124	0.00790196	0.0056732	0.00587582	0.00069281	0.00301961	0.000954248	0	0.000803922	0.00769281	0.00190196	0.000797386	0.00705229	0	0	0	0.00126144	0.0039085	0.00117647	0.00433333	0.00856209	0.00230065	0	0	0	0	0
DG_100	2021	0.164544	0.413713	0.368896	0	0.0277044	0.00243188	0.000442779	0.00703678	0.0160967	0.00333106	0.00636921	0.164544	0.654169	0.00605586	0.025252	0.0217166	0.00417575	0.00754087	0.0352793	0.000497275	0	0.0130109	0.0038079	0.0163011	0.00925068	0.00781335	0.0186172	0.0305041	0	0.0396526	0.0108719	0.0106267	0.00871253	0.200954	0.0044346	0	0.00126022	0.0104837	0.0851226	0.21594	0.735266	0.0717847	0.109257	0.000320163	0.00179837	0	0.0024455	0.000279292
DG_101	2021	0.084412	0.271422	0.24713	0.00186711	0.134578	0.0111761	0.0017608	0.0179269	0.10586	0.0171429	0.0108571	0.233322	0.390153	0.0207575	0.212492	0.109535	0.0105449	0.0506312	0.0778804	0.00160797	0	0.0668106	0.00948173	0.0272093	0.0143123	0.0239336	0.0474086	0.0298007	0	0.024711	0.0462458	0.00894352	0.0323256	0.339502	0.000717608	0	0.00237874	0.0260797	0.141508	0.0379402	0.16109	0.0305183	0.0487375	0	0.000750831	0	0	0
DG_104	2021	0.0503708	0.220401	0.205891	0.00183587	0.0316474	0.0023465	0.000206687	0.00790274	0.0114711	0.00386626	0.00508207	0.133666	0.515781	0.0125775	0.0313252	0.0230578	0.00417629	0.0047234	0.0663769	0.00117933	0	0.00570213	0.00857751	0.00226748	0.0166626	0.00144681	0.00492401	0.000978723	0	0.000455927	0.00642553	0.00179331	0.000930091	0.00509422	0	0	0	0.00178116	0.00306383	0.00128267	0.00145897	0.00433435	0.00178723	0	0	0	0	0
DG_105	2021	0.057996	0.452304	0.407696	0.00184421	0.069008	0.00727031	0.00171105	0.0258389	0.045273	0.00869507	0.016751	0.305979	0.694101	0.0182024	0.0884487	0.0571904	0.00653129	0.020759	0.0824767	0.00798935	0	0.0569441	0.0119774	0.0234221	0.0171238	0.0115779	0.026731	0.0212517	0	0.0264913	0.0222104	0.011012	0.0119308	0.0759121	0.0014514	0	0.00114514	0.0120573	0.039281	0.0551332	0.340499	0.086771	0.0623169	0.00250333	0.0183356	0	0.0179028	0.00101864
DG_106	2021	0.0735073	0.291777	0.209729	0.00227213	0.0478071	0.00323646	0.00112285	0.0186856	0.0285535	0.00858653	0.0119419	0.143587	0.682338	0.0213276	0.0618758	0.0458322	0.00470938	0.0130911	0.103375	0.000660502	0	0.0271863	0.0105284	0.0131572	0.012041	0.00350066	0.00858653	0.0104756	0	0.0128468	0.0112616	0.00755614	0.00575958	0.189881	0.00280053	0	0	0.00222589	0.0334214	0.0315918	0.0975165	0.0193857	0.031103	0	0	0	0	0
DG_110	2021	0.128425	0.667508	0.743523	0	0.0440801	0.00843856	0.00102512	0.0188323	0.03685	0.00614392	0.0123422	0.368486	0.358439	0.0279158	0.042797	0.0509301	0.0109572	0.0175424	0.185153	0	0	0.00539715	0.0128853	0.00704005	0.026239	0.00202987	0.00634759	0.00315003	0	0.00279701	0.00897488	0.00423625	0.00141208	0.00911066	0	0	0	0.00318398	0.00698574	0.00255261	0.0313917	0.0156959	0.0099389	0	0	0	0	0
DG_111	2021	0.194364	0.159501	0.251209	0	0.0129937	0.00106817	0	0.0108363	0.0134013	0.00266339	0.0071539	0.198271	0.380963	0.00764582	0.0158046	0.0147294	0.0054111	0.00478566	0.0486859	0.000302178	0	0.00898805	0.00463809	6.32467e-05	0.0105481	0.000414617	0.0026142	0.0013071	0	0.000962755	0.00206606	0.00129304	0.000344343	0.00520028	7.02741e-05	0	0.000175685	0.000618412	0.00199578	0.00221363	0.0121504	0.0123401	0.00368236	0	0.00115952	0	0.00210119	0
DG_114	2021	0.229187	0.429152	0.397251	0	0.0119576	0.00151237	0.000120141	0.00308127	0.0101343	0.00551943	0.00455124	0.0832226	0.359237	0.00587986	0.0162544	0.0150601	0.00480565	0.00697527	0.0411025	0.000586572	0	0.0139717	0.003053	0.0120071	0.020311	0.00290459	0.0118092	0.00226148	0	0.000530035	0.00563958	0.00184452	0.00158304	0.00608481	0	0	0.000275618	0.00554064	0.00868551	0.00188693	0.00541343	0.00877032	0.00231095	0	0	0	0	0
DG_115	2021	0.447744	1.10295	1.23645	0	0.03494	0.00257121	0.000277361	0.0137631	0.036012	0.00871814	0.016057	0.213463	0.413336	0.0155922	0.0526462	0.0439205	0.00613943	0.0134633	0.0501499	0.0037931	0	0.0423088	0.00526237	0.0257346	0.0191604	0.0213793	0.0468891	0.0576762	0	0.0941379	0.0318291	0.0106822	0.0203298	0.329198	0.00134933	0	0.00234633	0.0330135	0.118726	0.204738	2.07923	0.21548	0.238456	0	0.00236882	0	0.0047901	0
DG_116	2021	0.0821351	0.426709	0.247595	0	0.0191284	0.00202703	0.000810811	0.00962162	0.0126824	0.00280405	0.0065473	0.129845	0.554169	0.00672973	0.0222095	0.0201757	0.00358108	0.00520946	0.0329527	0.00172297	0	0.00849324	0.00360135	0.00790541	0.0251757	0.00237162	0.01025	0.00580405	0	0.00617568	0.00537162	0.00922973	0.00289189	0.0745676	0	0	0	0.00377703	0.0195743	0.0124189	0.0493581	0.0173919	0.0181216	0.000966216	0.010277	0	0.0336892	0.00275676
DG_118	2021	0.0407945	0.225588	0.175443	0.00155614	0.0344977	0.00270519	0.000794485	0.0168746	0.0249573	0.00695995	0.00995404	0.200053	0.440374	0.01652	0.042042	0.0306041	0.00666448	0.0124294	0.098155	0.0064478	0	0.0404924	0.00789888	0.0196651	0.0117072	0.00967827	0.0209849	0.0153185	0	0.0217794	0.016671	0.00313198	0.00839133	0.0597899	0.00135916	0	0.00101116	0.00992777	0.0245371	0.0644649	0.287846	0.0473539	0.0515693	0	0.000531845	0	0	0.000400525
DG_122	2021	0.0559841	0.266407	0.190812	0.00280053	0.0570476	0.00389036	0.000402906	0.0142734	0.0329723	0.00931968	0.00876486	0.131367	0.31426	0.0164861	0.0687318	0.0404425	0.00442536	0.00996697	0.0619022	0.0521598	0	0.0185403	0.00414135	0.00627477	0.0040753	0.00848085	0.0189894	0.0146103	0	0.0170211	0.0152906	0.00430647	0.007107	0.0668626	0.00379789	0	0	0.00729194	0.0238441	0.105185	0.223613	0.0265192	0.0417371	0.000634082	0.0040753	0	0.00586526	0.000402906
DG_125	2021	0.0505774	0.552425	0.452385	0.00237092	0.0590965	0.00401495	0.00163043	0.017962	0.033322	0.0108492	0.0162024	0.279069	0.72623	0.0171128	0.0946943	0.0519769	0.00565217	0.0177038	0.0804688	0.0264742	0	0.0704144	0.010462	0.0284443	0.0092731	0.0148709	0.0336277	0.0308832	0	0.0612432	0.0244565	0.00806386	0.0144022	0.206033	0.00508152	0	0.00237092	0.00900136	0.0385802	0.104083	0.791549	0.0758356	0.145842	0.00133152	0.0257473	0	0.0248573	0.0013519
DG_126	2021	0.0175558	0.211511	0.118055	0.0017477	0.0705913	0.00586071	0.00144547	0.0112089	0.058272	0.00908673	0.00640604	0.162214	0.256537	0.0138305	0.106051	0.0554139	0.00630749	0.0231537	0.0590999	0.0010841	0	0.0305322	0.00602497	0.0170237	0.00908673	0.00924442	0.0216229	0.0141327	0	0.0180355	0.0199606	0.00359396	0.00691853	0.0612615	0.00471748	0	0.00166886	0.00944809	0.0243758	0.0754599	0.20205	0.0624967	0.039159	0	0.00172142	0	0	0
DG_129	2021	0.04166	0.08334	0.0376573	0.00147256	0.0317805	0.00289826	0.00176037	0.00797189	0.0145716	0.00556894	0.00421017	0.1	0.557202	0.00790495	0.0294645	0.0188755	0.00280455	0.00719545	0.0456091	0.00237617	0	0.04583	0.00614458	0.0284739	0.011834	0.00277108	0.00717537	0.00946452	0	0.0117001	0.00607764	0.00461847	0.00516064	0.151258	0.00120482	0	0	0.00180054	0.0283936	0.0182731	0.0789826	0.0182865	0.0274766	0.00138554	0.00341365	0	0.00138554	0.000508701
DG_130	2021	0.0542033	0.353819	0.256319	0.00287775	0.0250962	0.00161401	0.000755495	0.00951923	0.0114354	0.00512363	0.00662775	0.103187	0.380391	0.00842033	0.0321429	0.0185302	0.00171703	0.00794643	0.0432692	0.0137088	0	0.0297527	0.00324863	0.00994505	0.00533654	0.0175824	0.0393132	0.022342	0	0.0166071	0.0220879	0.00809753	0.0167651	0.0904945	0.00491071	0	0.00115385	0.0157967	0.0580014	0.10774	0.169657	0.027658	0.0450137	0.00127747	0.00645604	0	0.00330357	0.000686813
DG_135	2021	0.0779961	0.611795	0.272343	0	0.0330287	0.00240862	0.000476501	0.00669713	0.025842	0.00343342	0.00516319	0.126899	0.40923	0.0156723	0.0364034	0.0269256	0.00473238	0.0083094	0.042017	0.0150979	0	0.00973238	0.00293081	0.00580287	0.00791123	0.00565927	0.0141449	0.0142167	0	0.0223368	0.0096671	0.00300261	0.00520235	0.0778655	0	0	0.00111619	0.00711488	0.0304504	0.0548499	0.280248	0.0475914	0.0654765	0.00106397	0.00779373	0	0.00770888	0.00120104
DG_141	2021	0.129355	0.395011	0.179544	0	0.0139734	0.000686755	0.000539594	0.00659425	0.00857043	0.00431675	0.00453399	0.0850876	0.30253	0.00510161	0.013658	0.00867554	0.00351787	0.00361598	0.026356	0.00299229	0	0.0110512	0.00316748	0.000434478	0.0232656	0.00121233	0.00721093	0.00124737	0	0.000469516	0.0029993	0.00188507	0.000882971	0.00403644	0.000112123	0	0.000112123	0.00256482	0.00453399	0.000217239	0.00360897	0.00597057	0.00189208	0.000385424	0.000539594	0	0.000350385	0
DG_144	2021	0.29488	0.346896	0.330187	0	0.0291522	0.00273031	0.00209613	0.0142056	0.0362884	0.00459279	0.00657543	0.198598	0.566636	0.0115821	0.0394526	0.0270895	0.00427236	0.0104272	0.074279	0.000781041	0	0.12514	0.00436582	0.00191589	0.0114219	0.00881842	0.0237517	0.0135381	0	0.00917223	0.0173298	0.00720961	0.00742323	0.109493	0.00378505	0	0.0017223	0.0179239	0.0606208	0.0464953	0.133725	0.0264352	0.0266288	0	0.000740988	0	0.000607477	0
DG_146	2021	0.0771362	0.155184	0.210979	0.00195842	0.0253454	0.00178404	0.000402414	0.00901408	0.011784	0.00278337	0.00495641	0.0989068	0.284722	0.00818243	0.0169014	0.0120657	0.0055332	0.0037827	0.047505	0.0137089	0	0.00881958	0.00592891	0.00496982	0.00790074	0.000744467	0.00305835	0.0014554	0	0.00107311	0.00313883	0.00293092	0.000583501	0.00655265	0	0	0	0.000771294	0.00255533	0.0031053	0.00807512	0.0354661	0.0031992	0.000402414	0.0013615	0	0	0
DG_149	2021	0.241394	0.598423	0.471036	0	0.0277299	0.00283212	0	0.0099854	0.0197372	0.00785401	0.00525547	0.264577	0.917847	0.0104818	0.0237518	0.0240803	0.00632847	0.00457664	0.0635182	0.0160876	0	0.0171825	0.00436496	0.000284672	0.0117591	0.0010292	0.00463504	0.00131387	0	0.00118978	0.00465693	0.0019781	0.000722628	0.00635036	0.000182482	0	0.000248175	0.00240146	0.00416788	0.00373723	0.0197956	0.0171898	0.00440876	0	0.000671533	0	0.0010073	0
DG_151	2021	0.0503581	0.431176	0.345459	0.00190541	0.0424189	0.00300676	0.00202027	0.0173986	0.0230405	0.0117365	0.0149865	0.187236	0.467851	0.0189054	0.0726149	0.050277	0.0039527	0.0144527	0.0461081	0.0436081	0	0.0639932	0.0123649	0.0272027	0.0120473	0.02075	0.0398851	0.0233784	0	0.0334324	0.0331216	0.00483108	0.0177297	0.125068	0.00118919	0	0.00272297	0.0189527	0.0500338	0.0487365	0.405088	0.0891959	0.0778378	0.00264189	0.0246014	0	0.0346014	0.00377703
DG_154	2021	0.148715	0.383971	0.326466	0.00276828	0.0408271	0.00250171	0.00215311	0.0156528	0.0118455	0.0115926	0.0180793	0.176787	0.472584	0.0159398	0.0550239	0.0407109	0.00391661	0.00815448	0.041907	0.00591251	0	0.0700889	0.00836637	0.0288107	0.011203	0.0127068	0.0290909	0.0125837	0	0.0140328	0.0221121	0.0068216	0.00975393	0.108824	0.00487355	0	0.0019959	0.0112509	0.0298701	0.0501846	0.176288	0.0553725	0.0373479	0.000492139	0.0028093	0	0.00306904	0.000854409
DG_155	2021	0.0488803	0.357529	0.204389	0.00179537	0.0439833	0.00341055	0.000572716	0.0153282	0.0185071	0.00564994	0.00954311	0.164408	0.65749	0.0121815	0.0457336	0.0347169	0.00277992	0.00475547	0.0522136	0.00295367	0	0.0402445	0.0102381	0.0130245	0.00842342	0.012471	0.0260489	0.0251094	0	0.0310232	0.0178571	0.00803732	0.0138996	0.153591	0.0164865	0	0.00324324	0.00968468	0.0564286	0.202857	0.32612	0.0492857	0.0737902	0.00305663	0.0110553	0	0.0102574	0.00157658
DG_157	2021	0.0602318	0.0949012	0.0891343	0.00247444	0.0415951	0.00184049	0.00283572	0.018698	0.0320109	0.0133401	0.011302	0.172529	0.451275	0.0139468	0.0623517	0.0365781	0.00398091	0.0122495	0.0483572	0.00064758	0	0.0576414	0.00505794	0.0232584	0.0158487	0.00137696	0.00458759	0.0042604	0	0.00520791	0.00799591	0.00330607	0.00217451	0.0543013	0	0	0	0.00111793	0.0109543	0.0173211	0.0691002	0.0271575	0.013606	0.000756646	0.00177914	0	0.00279482	0.00173142
DG_166	2021	0.0557238	0.344761	0.246401	0.00154714	0.0214409	0.000816733	0.000159363	0.0122908	0.00742364	0.00192563	0.00630146	0.121235	0.522278	0.00695219	0.0153254	0.0109429	0.00250996	0.00164011	0.0338911	0.0103453	0	0.00494688	0.00981408	0.00200531	0.00691235	0.000723772	0.0024834	0.00122842	0	0.00120186	0.00278884	0.00173971	0.000571049	0.00701859	0	0	0	0.000883134	0.0024834	0.00182603	0.0125631	0.0455312	0.0036587	0	0.00115538	0	0.000743692	0
DG_168	2021	0.125556	0.049233	0.123362	0	0.00989247	0.00055914	7.8853e-05	0.00614337	0.00778495	0.00205735	0.00400717	0.110616	0.49557	0.00643728	0.0117706	0.0101577	0.00303226	0.00351971	0.0344875	0.00157706	0	0.00473835	0.0014552	0.00369892	0.00521147	0.00103943	0.00364158	0.000602151	0	0.000200717	0.00242294	0.00130466	0.000494624	0.00235842	0	0	0.000143369	0.0018638	0.00227957	0.000845878	0.00118996	0.00499642	0.000401434	0	0.00131183	0	0.00164875	0.000114695
DG_172	2021	0.0357443	0.126349	0.0826781	0.00247455	0.0411705	0.00249364	0.000381679	0.0187341	0.0235687	0.0069084	0.0113422	0.170172	0.527023	0.0176972	0.0568448	0.0376399	0.00611323	0.0140013	0.0710687	0.00212468	0	0.019014	0.00887405	0.00612595	0.00706107	0.00610687	0.0137786	0.0182125	0	0.0390331	0.0118003	0.00451654	0.00683206	0.125433	0.00223282	0	0.000979644	0.00265267	0.0211641	0.11	0.584377	0.0572137	0.0898919	0.000801527	0.00258906	0	0.00284987	0.00101145
DG_173	2021	0.134265	0.644238	0.385559	0	0.0199391	0.00142857	0.000778605	0.0100948	0.0143737	0.00658091	0.00664861	0.128788	0.498003	0.00941097	0.0234462	0.0168856	0.00319567	0.00563981	0.0413135	0.00596479	0	0.0244956	0.00197698	0.000934326	0.00425863	0.00962085	0.0278944	0.0153216	0	0.0170481	0.014868	0.00506432	0.00620853	0.071002	0.00110359	0	0.000934326	0.0136493	0.0391334	0.0391808	0.249208	0.0205416	0.0460867	0.000162492	0.00214624	0	0.00129316	0.000541638
DG_176	2021	0.0729523	0.153773	0.0891392	0.00175521	0.0544385	0.00412239	0.000517821	0.0289509	0.0301479	0.00750504	0.016234	0.206369	0.407243	0.016651	0.0611365	0.0397243	0.00577001	0.0542569	0.0558776	0.00930061	0	0.033033	0.00880296	0.0136046	0.00582381	0.00794217	0.0158574	0.0220377	0	0.0464156	0.0139475	0.00417619	0.00802286	0.106288	0.00594486	0	0.00203766	0.00431069	0.0199126	0.202488	0.634102	0.125548	0.103598	0.00406859	0.0066308	0	0.00658373	0.0097579
DG_177	2021	0.0574231	0.274795	0.20316	0.00263462	0.0941987	0.00864103	0.00400641	0.0276603	0.096609	0.027141	0.0192756	0.193321	0.424192	0.0297885	0.170878	0.0927244	0.00794231	0.0314615	0.127686	0.0235641	0	0.141712	0.0139038	0.0735833	0.0115321	0.00292949	0.00648077	0.00884615	0	0.0112628	0.0198013	0.00778205	0.00325	0.0746859	0.001	0	0.000717949	0.00188462	0.0160256	0.028359	0.168481	0.0423782	0.0295962	0.00322436	0.0225385	0	0.0224615	0.00111538
DG_181	2021	0.191091	0.437327	0.400029	0	0.0164379	0.00115607	0.000245665	0.00924133	0.00580202	0.00206647	0.00440029	0.163707	0.69177	0.00699422	0.00892341	0.00859104	0.00256503	0.00239884	0.040896	0.0053974	0	0.0013078	0.00328757	0.000903179	0.00827312	0.000989884	0.00403179	0.00117775	0	0.000606936	0.00276734	0.00153902	0.000570809	0.00273844	0	0	0	0.00151012	0.00265173	0.000520231	0.00458092	0.00433526	0.00206647	0	0	0	0	0
DG_183	2021	0.0719709	0.328958	0.224788	0	0.0250916	0.00252685	0.000360076	0.0116804	0.0350663	0.00712571	0.00689829	0.109678	0.284125	0.0144915	0.0426216	0.0319962	0.00593809	0.00521794	0.0626216	0.000486418	0	0.0168478	0.00511687	0.000524321	0.00619078	0.000499052	0.00308907	0.000587492	0	0.000429564	0.00502843	0.00141503	0.000157928	0.00325332	0.000101074	0	0	0.000675932	0.00153506	0.000581175	0.00222994	0.00552116	0.0014403	0	0.000309539	0	0.000240051	0.000524321
DG_184	2021	0.0479545	0.194897	0.0734642	0.00285124	0.0335055	0.00249311	0.000736915	0.00592287	0.00969697	0.00703168	0.00526171	0.110255	0.38916	0.00741047	0.029332	0.0176171	0.00292011	0.00236915	0.0306061	0.0139532	0	0.0101033	0.00679752	0.00535124	0.0165496	0.000971074	0.00362948	0.00118457	0	0.000495868	0.0050551	0.00174242	0.000530303	0.00528926	0	0	0	0.00108815	0.00274105	0.000736915	0.00252755	0.00177686	0.00146006	0	0.000998623	0	0	0
DG_197	2021	0.030787	0.100642	0.0348148	0.00234127	0.0335847	0.00224868	0.00031746	0.00757937	0.0177513	0.00521825	0.00511243	0.131687	0.460522	0.0118519	0.0348347	0.0240146	0.0044246	0.00787698	0.0617262	0.00564815	0	0.0142791	0.00441138	0.00621032	0.0192526	0.00521825	0.013631	0.00457672	0	0.00255291	0.0111243	0.00585317	0.00441799	0.0266997	0.000648148	0	0.000998677	0.00574074	0.0158796	0.00794974	0.0213161	0.00996693	0.00669312	0	0	0	0	0
DG_205	2021	0.0231065	0.0664056	0.0647176	0.00239409	0.0375674	0.0196662	0.000564827	0.0203402	0.0388318	0.00904365	0.0105712	0.139365	0.29061	0.0260847	0.0609307	0.0438447	0.00645058	0.0141078	0.0975802	0.00130937	0	0.0258216	0.00501926	0.00858151	0.00614249	0.0079525	0.0178498	0.0244352	0	0.0380167	0.0141656	0.00372914	0.00858793	0.102092	0.0176893	0	0	0.00378691	0.0280488	0.229865	0.48165	0.0599101	0.091932	0	0	0	0	0
DG_212	2021	0.0509034	0.130477	0.0704203	0.00199498	0.0558657	0.00565245	0.00242158	0.0113676	0.0268005	0.00755332	0.00695734	0.194987	0.624379	0.011744	0.057064	0.0365433	0.00328733	0.00744668	0.0487139	0.00171267	0	0.0676913	0.00948557	0.0374153	0.00887077	0.00671267	0.0139962	0.0259787	0	0.0391907	0.0119824	0.00523212	0.0127039	0.346775	0.0037202	0	0.000395232	0.00291719	0.0710289	0.08766	0.434787	0.0247491	0.0927478	0.00124843	0.000865747	0	0	0.000370138
DG_174	2021	0.0493256	0.111723	0.0746168	0.00196812	0.0259166	0.00142244	0.00015328	0.00971796	0.0113979	0.0053832	0.0064439	0.14488	0.492514	0.00764562	0.0268118	0.020656	0.00415083	0.00436542	0.0412385	0.00202943	0	0.011355	0.00850399	0.00530349	0.0119252	0.00102391	0.00427345	0.00118332	0	0.00076027	0.00559166	0.00164929	0.000876763	0.00649908	0	0	0	0.00171061	0.00343961	0.000882894	0.00488044	0.00652974	0.00233599	0	0.000656039	0	0.000637646	0
DG_214	2021	0.243645	0.301181	0.327063	0.00219204	0.0361276	0.0021415	0.000233733	0.0169615	0.0185597	0.00519899	0.0136702	0.117846	0.254807	0.0206822	0.0499621	0.0359886	0.00592546	0.0120088	0.095079	0.00419457	0	0.00912824	0.0116425	0.00404296	0.0109539	0.00107391	0.00432723	0.00131396	0	0.0011055	0.0079343	0.00216045	0.000713834	0.00706886	0	0	0	0.00118762	0.00336071	0.00147821	0.00525584	0.00864814	0.00265319	0.000600126	0.0014403	0	0.00124447	0.000473784
DG_215	2021	0.128506	0.236188	0.330867	0	0.0394096	0.00295918	0.000677843	0.00354956	0.0308819	0.00158163	0.00380466	0.20793	0.934701	0.0083965	0.0368878	0.0288047	0.00387026	0.0137245	0.0345262	0.0028863	0	0.0234038	0.00164723	0.011414	0.00672012	0.00153061	0.00468659	0.00395773	0	0.00262391	0.00610787	0.00330175	0.00168367	0.0441327	0.00190233	0	0.000379009	0.00249271	0.0174781	0.0338557	0.0484111	0.0158017	0.00697522	0.000233236	0.00120991	0	0.00145044	0.000153061
DG_222	2021	0.068038	0.376653	0.292213	0.0028038	0.040258	0.00285811	0.000522743	0.00973523	0.0122064	0.00429735	0.00672777	0.155757	0.388934	0.0146096	0.0313442	0.0206585	0.00475221	0.0038425	0.0648133	0.00184657	0	0.0108961	0.0120027	0.0054243	0.0111677	0.00900204	0.0248676	0.0045146	0	0.00133062	0.0155126	0.00340122	0.00518669	0.00949762	0.000522743	0	0.00112695	0.00913103	0.0126137	0.00641548	0.0132722	0.0319212	0.00385608	0	0	0	0	0
DG_223	2021	0.0726823	0.396569	0.317292	0.00246671	0.0509385	0.002974	0.000995561	0.0320228	0.0235384	0.0079962	0.0206088	0.186652	0.487489	0.0171211	0.0634623	0.0386367	0.00356373	0.0202219	0.0574001	0.00414077	0	0.0324223	0.00499683	0.00704502	0.00457197	0.00704502	0.0161192	0.0183703	0	0.0346417	0.0132023	0.00542169	0.00793278	0.140799	0.00383006	0	0.00114141	0.00367787	0.0257958	0.0971401	0.49988	0.0568738	0.0865948	0	0.00136335	0	0.00177552	0
DG_224	2021	0.111984	0.435192	0.493053	0	0.0582986	0.00646268	0.00102219	0.016846	0.04846	0.00886348	0.00942165	0.308594	0.314008	0.0206389	0.0889038	0.0626026	0.00600538	0.0202555	0.111157	0.00251513	0	0.0208406	0.00412239	0.00710827	0.00589106	0.00977808	0.0201748	0.0329926	0	0.083423	0.0208339	0.0100874	0.0116745	0.193161	0.0029119	0	0.00122394	0.00761264	0.0288635	0.0841157	0.977922	0.0714055	0.212394	0.000854069	0.00400134	0	0.00773369	0.000537996
DG_225	2021	0.056899	0.0889186	0.0677199	0.00265147	0.0261238	0.00111401	0.00067101	0.0110228	0.0111466	0.00798046	0.00784365	0.103023	0.392007	0.00934853	0.0288013	0.021127	0.00397394	0.0047557	0.0416482	0.000221498	0	0.0130033	0.00545928	0.00564821	0.0105668	0.0105472	0.0256026	0.00369381	0	0	0.0173681	0.00198046	0.00572638	0.00620195	0	0	0.00158958	0.0107818	0.0127036	0.00136808	0.00118567	0.00632573	0.00197394	0.000547231	0	0	0	0.000612378
G1-7720	2021	0.0412601	0.191701	0.160819	0.00145251	0.0448852	0.00443203	0.00139044	0.00970826	0.0253818	0.00638734	0.00617008	0.112955	0.413178	0.00925512	0.0506145	0.032514	0.00481688	0.00708876	0.0344879	0.00159528		0.0396276	0.00596524	0.0203911	0.00848541	0.0185351	0.0379019	0.0176785		0.0121912	0.0170577	0.00403476	0.0148293	0.0963315	0.00390441		0.00306642	0.0196151	0.0504407	0.0570701	0.101316	0.0213718	0.0277281	0.00101179	0.00587213		0.00647424	0.000608318
DG_147	2022	0.0556183	0.256647	0.216781	0.000262097	0.0473589	0.0059543	0.00138441	0.0276344	0.0338508	0.00834677	0.0106183	0.326996	0.811929	0.015121	0.0489113	0.0321371	0.00535618	0.0101344	0.146888	0.00155914	0	0.0438105	0.0106384	0.0249597	0.00107527	0.00887097	0.0147177	0.0283938	0	0.0797446	0.0128159	0.00452285	0.00879032	0.0675806	0.0159812	0	0.000645161	0.00408602	0.0128763	0.16797	1.18099	0.0719153	0.158058	0	0.005	0	0	0
DG_096	2022	0.0633659	0.214834	0.220907	0.000169602	0.0379974	0.00516634	0.00265492	0.00915851	0.0251272	0.00676451	0.00679713	0.250607	0.762166	0.00587736	0.0362883	0.0205153	0.0026484	0.00584475	0.0237312	0.000482714	0	0.0935356	0.00956947	0.0493216	0.00240705	0.00945858	0.0164905	0.0300848	0	0.0735616	0.0107371	0.00641226	0.0115851	0.27167	0.00204175	0	0.000463144	0.00436399	0.0418656	0.0958121	0.921148	0.0559883	0.157247	0	0	0	0	0
DG_125	2022	0.0448195	0.243463	0.190642	0.00161096	0.0202874	0.000454545	0.00032754	0.00998663	0.0102206	0.00224599	0.00536765	0.189826	0.425154	0.00988636	0.0228944	0.0135762	0.00290107	0.00502674	0.0452807	0.00605615	0	0.0129813	0.00663102	0.00458556	0.00697193	0.0152406	0.033643	0.0294719	0	0.055107	0.0169652	0.00792781	0.0139104	0.178556	0.0101872	0	0.0018516	0.00979947	0.0445388	0.174245	0.679325	0.0526203	0.135989	0.00190508	0.00480615	0	0	0
DG_205	2022	0.0287059	0.0532092	0.0565621	0.000156863	0.0154641	0.00143137	0.000339869	0.00571895	0.00682353	0.00205229	0.00315686	0.173033	0.403438	0.00794118	0.0135359	0.0170392	0.0093268	0.00556863	0.052268	0.00259477	0	0.0107712	0.00362092	0.00726144	0.00801307	0.015085	0.0297124	0.0382614	0	0.0467843	0.0149346	0.00433333	0.0171895	0.157105	0.0250065	0	0.00211111	0.00826797	0.0649804	0.334118	0.412026	0.0660784	0.110856	0	0.0034183	0	0	0
DG_029	2022	0.0240013	0.242004	0.169362	0.000188679	0.0323617	0.00344177	0.000605075	0.0106571	0.0177619	0.00454131	0.0057905	0.155615	0.53998	0.0108848	0.0290371	0.0176252	0.00366298	0.0555758	0.0355368	0.00135979	0	0.0261353	0.00510085	0.00946649	0.000689655	0.0061028	0.0101496	0.0209369	0	0.052108	0.00731945	0.00430059	0.00646714	0.057352	0.026825	0	0	0.00143136	0.0127521	0.247944	0.659499	0.0459662	0.100768	0	0.00288224	0	0.000767729	0
DG_191	2022	0.0317756	0.146394	0.0776669	0.000185822	0.0330489	0.00264281	0.000949759	0.00708878	0.0106813	0.00196834	0.00390227	0.139511	0.351549	0.0054095	0.0250447	0.0160289	0.00683414	0.0064969	0.021755	0.00343427	0	0.0189539	0.00512732	0.00916724	0.00262216	0.012808	0.0197522	0.0372884	0	0.0462078	0.0112182	0.00669649	0.0131796	0.053097	0.00934618	0	0.0012044	0.00452856	0.0287405	0.407515	0.457261	0.0411012	0.105458	0	0	0	0	0
DG_098	2022	0.0393725	0.1753	0.125287	0.0014486	0.0311615	0.00293725	0.000927904	0.00873164	0.0205674	0.00597463	0.00681575	0.142363	0.558064	0.00862483	0.0407677	0.0257744	0.00251669	0.0323565	0.0291121	0.000694259	0	0.0487717	0.00634846	0.0203672	0.00716956	0.00771696	0.0152737	0.0284246	0	0.040968	0.0109746	0.00961949	0.0157343	0.319927	0.00343124	0	0.00106809	0.00351135	0.084279	0.126956	0.384953	0.042263	0.0890587	0	0	0	0	0
DG_100	2022	0.0440601	0.261762	0.313238	0.000150131	0.0259008	0.00280679	0.000293734	0.00954308	0.010953	0.00217363	0.00444517	0.187859	0.593779	0.00794386	0.0254765	0.0184073	0.00410574	0.0324151	0.0392232	0.00342037	0	0.0123433	0.00934073	0.00765666	0.0112337	0.0142755	0.0316645	0.0358355	0	0.0445431	0.0181984	0.0098107	0.0191123	0.171952	0.0137598	0	0.00190601	0.00853133	0.0707833	0.206671	0.390757	0.0447715	0.0911031	0.000926893	0.00447781	0	0	0.000855091
DG_101	2022	0.0474425	0.174445	0.165839	0.000108254	0.0345399	0.00315968	0.000446549	0.0113329	0.0185115	0.00282138	0.00554804	0.281969	0.746955	0.00634641	0.0301691	0.01477	0.00274019	0.00804465	0.028065	0.00193505	0	0.0160217	0.00686062	0.00629229	0.00751015	0.0167727	0.0354195	0.0329432	0	0.0276049	0.0206428	0.00596752	0.024567	0.278322	0.00188092	0	0	0.0188836	0.114689	0.164296	0.278687	0.0322666	0.068931	0.000933694	0.00420839	0	0	0.000622463
DG_116	2022	0.0743638	0.396162	0.277234	0.00403873	0.0515076	0.00288382	0.00289073	0.0109959	0.0152628	0.00750346	0.00751729	0.190871	0.836459	0.00718534	0.0397994	0.0239903	0.00286307	0.0043361	0.0297165	0.00800138	0	0.0640802	0.0112794	0.0277317	0.0217566	0.0110858	0.0264108	0.0305325	0	0.027953	0.015325	0.0199793	0.0191148	0.433133	0.00979945	0	0.000954357	0.00688797	0.0954426	0.135166	0.152898	0.0267981	0.0678562	0.00370678	0.025166	0	0.0177801	0.0115768
DG_107	2022	0.0157877	0.0740211	0.0518985	0.000243902	0.0196638	0.00182597	0.000626236	0.00659855	0.00594595	0.00298616	0.0036058	0.173494	0.38085	0.00541859	0.0126566	0.00655241	0.00250494	0.0399473	0.0245946	0.00436388	0	0.0159591	0.00413316	0.00750165	0.00225445	0.00599209	0.0108438	0.0205735	0	0.0377653	0.00564931	0.00208306	0.00684904	0.05265	0.00925511	0	0.000566908	0.00178642	0.0157416	0.279196	0.470461	0.0336388	0.0833553	0	0.00151615	0	0	0.000435069
DG_172	2022	0.0416	0.118448	0.161738	0.00166897	0.0294552	0.0018	0.000413793	0.0120552	0.00806207	0.00294483	0.00695862	0.257241	0.645938	0.00688966	0.0214483	0.0145172	0.00302759	0.0368621	0.0355517	0.00713793	0	0.0177448	0.00844828	0.0066	0.0106276	0.00790345	0.0162966	0.019331	0	0.0298345	0.0101862	0.010131	0.00936552	0.143283	0.00542759	0	0.00182759	0.00477931	0.0356276	0.163434	0.444938	0.0484276	0.0769724	0.000731034	0.00873793	0	0.00211034	0.000524138
DG_173	2022	0.042	0.365122	0.230601	0.00175676	0.0219054	0.000912162	0.000648649	0.00859459	0.0065	0.00194595	0.00502703	0.180736	0.484169	0.00775	0.017777	0.0111757	0.00201351	0.0356419	0.0366486	0.00391216	0	0.00993919	0.0052973	0.00350676	0.00652027	0.0191622	0.0415946	0.0233986	0	0.0326486	0.0241149	0.0067027	0.0162838	0.126554	0.00367568	0	0.00285811	0.0170203	0.0476419	0.11773	0.421304	0.0385811	0.08325	0.00154054	0	0	0	0
DG_162	2022	0.0402445	0.319382	0.197896	0.000199485	0.0243694	0.00289575	0.000849421	0.011583	0.0118855	0.00363578	0.00463964	0.156892	0.545798	0.00445946	0.0204633	0.0107593	0.00323681	0.00349421	0.0212033	0.00178893	0	0.0233526	0.00589447	0.0116152	0.00150579	0.0059009	0.0115766	0.0169305	0	0.0434363	0.00656371	0.00456885	0.00666667	0.0697619	0.00182754	0	0.000894466	0.002426	0.0190605	0.0689125	0.563372	0.0375354	0.0909717	0.000630631	0.006139	0	0	0.00104247
DG_010	2022	0.0572077	0.0556446	0.0743955	0.000193721	0.0262057	0.00207749	0.00170341	0.0125785	0.0149232	0.00693387	0.00873079	0.173106	0.545357	0.00757515	0.0238945	0.0158383	0.00333333	0.0362926	0.0222912	0.000928524	0	0.0382766	0.0101804	0.0151837	0.00204409	0.00455578	0.00937208	0.0169005	0	0.0300668	0.0056847	0.0039813	0.0054843	0.072672	0.00437542	0	0.000734803	0.00110888	0.0180494	0.16318	0.421149	0.0697862	0.0689112	0.0012024	0.00672679	0	0.00152973	0.00158317
DG_124	2022	0.0447368	0.310777	0.212542	7.70218e-05	0.0141207	0.0012837	0.000385109	0.0107959	0.00876765	0.00224005	0.00595635	0.126829	0.477227	0.010276	0.0158151	0.0127856	0.00315789	0.0370924	0.0314313	0.0313928	0	0.00821566	0.00505777	0.00457638	0.0043389	0.00511553	0.0104814	0.0172015	0	0.0308729	0.00584082	0.00478177	0.006457	0.119564	0.00890244	0	0	0.00181001	0.0225674	0.126271	0.402291	0.0349037	0.075154	0.00245828	0.0126893	0	0.00228498	0.0012516
DG_154	2022	0.0455533	0.259885	0.193354	0.00178547	0.025981	0.00155465	0.00130346	0.00586558	0.0101222	0.0043924	0.00405295	0.103123	0.469328	0.0071962	0.0190496	0.0111609	0.00369314	0.0212899	0.0341344	0.00139172	0	0.0258113	0.00655804	0.0167957	0.0076239	0.0149016	0.0306382	0.0163612	0	0.0205974	0.0200339	0.00638832	0.0118058	0.102145	0.02778	0	0.00112016	0.0111881	0.0343041	0.20761	0.265499	0.0269518	0.0506585	0.000312288	0	0	0	0
DG_126	2022	0.0236243	0.210453	0.190033	0.000106596	0.0499334	0.0043571	0.00108594	0.0134577	0.0342438	0.00631579	0.00576282	0.250033	0.450773	0.0143304	0.0627582	0.0417255	0.00958694	0.0127915	0.0563957	0.00108594	0	0.0187608	0.00648235	0.00954031	0.00552298	0.0203731	0.0365356	0.0198268	0	0.0180413	0.028974	0.00423718	0.0136442	0.0815656	0.0101599	0	0.00321785	0.0231379	0.0437975	0.182025	0.272292	0.0321252	0.0464624	0.00083944	0.00301133	0	0	0.000512991
DG_208	2022	0.0288278	0.170701	0.186767	0.000416918	0.0167674	0.00165559	0.00106344	0.00648338	0.00899094	0.00324471	0.00422356	0.154344	0.56513	0.00463444	0.0166344	0.0107069	0.00221148	0.0226284	0.0182961	0.00793353	0	0.033571	0.0074139	0.0176133	0.00653776	0.0162779	0.0318792	0.0217885	0	0.0289607	0.0205921	0.00555891	0.0163444	0.145245	0.00958912	0	0.00204834	0.0142961	0.0557885	0.0849305	0.268955	0.0310997	0.0637039	0.00129305	0.00607855	0	0	0.00212085
DG_067	2022	0.025101	0.305003	0.244091	0.000260586	0.0152378	0.00127036	0.000254072	0.00648208	0.00616287	0.00201303	0.00325733	0.195453	0.435785	0.00405863	0.0102085	0.00609121	0.0015114	0.00220847	0.0166515	0.000716612	0	0.00985016	0.00237785	0.00261889	0.00180456	0.00522476	0.00989577	0.0155309	0	0.0335244	0.0046645	0.00332899	0.00543974	0.0410684	0.0028013	0	0.000403909	0.00208469	0.0122476	0.102906	0.440834	0.0372508	0.0778371	0	0	0	0	0
DG_130	2022	0.0160796	0.184372	0.136849	8.09717e-05	0.00916329	0.000681511	0.000276653	0.00379892	0.00361673	0.00161943	0.00234143	0.0985493	0.379008	0.00353576	0.00667341	0.0038664	0.00105938	0.0017004	0.0186572	0.00868421	0	0.0107895	0.00232119	0.00344804	0.0025641	0.0218421	0.0460796	0.0274831	0	0.0173617	0.0257625	0.0052834	0.0236977	0.0947773	0.00935897	0	0.0017274	0.0176113	0.075027	0.208286	0.146734	0.0165857	0.0465385	0	0.00267881	0	0	0
DG_177	2022	0.0771573	0.413592	0.343248	0.000182309	0.0333086	0.00322755	0.00181634	0.00677245	0.0156583	0.00493585	0.00366644	0.130513	0.436124	0.0098312	0.0345307	0.0264619	0.00493585	0.00717083	0.0501553	0.0257799	0	0.0313572	0.00620527	0.0165969	0.0120122	0.00411884	0.0110331	0.016023	0	0.0315125	0.00762323	0.00734639	0.00592167	0.12634	0.00345712	0	0	0.000546928	0.0235652	0.0698515	0.359048	0.0280756	0.0712964	0.000972316	0.00782579	0	0.00243079	0
DG_064	2022	0.0357075	0.125802	0.0564658	0.000101557	0.00970887	0	0.000162492	0.00725796	0.00525389	0.00102911	0.00381855	0.149201	0.308565	0.00345972	0.00618145	0.0100271	0.00601896	0.00410968	0.0223561	0.00484766	0	0.00511848	0.00280298	0.00316858	0.00354773	0.0065132	0.0152877	0.0141165	0	0.0196818	0.00741368	0.00402844	0.00682464	0.094719	0.00347326	0	0.00100203	0.00507786	0.0258497	0.133561	0.29065	0.0414963	0.0514557	0.00056195	0.00290454	0	0	0
DG_176	2022	0.0275457	0.22374	0.208401	0.000535248	0.0188251	0.00139687	0.000163185	0.00627937	0.00584856	0.00115535	0.00233681	0.127474	0.327493	0.00417755	0.0129308	0.00800914	0.00223238	0.0213577	0.0173172	0.0104308	0	0.00650131	0.00413185	0.00261749	0.00684726	0.00396867	0.0104504	0.0141971	0	0.0233616	0.00430809	0.00244778	0.00513708	0.0729047	0.00600522	0	0.00124021	0.00137076	0.0196671	0.166815	0.26062	0.0471279	0.0575261	0	0	0	0	0
DG_122	2022	0.0289524	0.17032	0.304122	4.7619e-05	0.0240952	0.00201361	0.000469388	0.010034	0.0119864	0.00385034	0.0055102	0.129238	0.572279	0.00888435	0.0255034	0.0170476	0.00307483	0.0037415	0.0350204	0.00131973	0	0.019381	0.00557143	0.00760544	0.00687755	0.024449	0.0483741	0.0204898	0	0.0104218	0.0323605	0.00506803	0.019966	0.0779184	0.0207415	0	0.00648299	0.0240816	0.0604626	0.173129	0.0809252	0.0670136	0.0248776	0.00122449	0.00553741	0	0	0.00103401
DG_057	2022	0.0485329	0.321303	0.301868	0.000203947	0.0383355	0.00517763	0.00232237	0.00892105	0.0295395	0.0100592	0.00475658	0.184513	0.580013	0.006125	0.0384934	0.019625	0.00188158	0.0215658	0.0277763	0.000657895	0	0.0750263	0.00753289	0.0426382	0.00278289	0.00423026	0.0105592	0.0148355	0	0.0209737	0.00716447	0.00426316	0.00748026	0.155743	0.00296711	0	0.00164474	0.00318421	0.0475132	0.0693553	0.255092	0.0256579	0.0492303	0	0	0	0	0
DG_182	2022	0.0603782	0.309641	0.241199	0.000179487	0.0179167	0.00146154	0.000762821	0.0145897	0.0160064	0.00314103	0.00617308	0.204218	0.542878	0.00532692	0.0211282	0.0121859	0.00219872	0.00516026	0.0290641	0.000814103	0	0.0177244	0.00602564	0.00894872	0.00146795	0.003	0.00646154	0.0112179	0	0.0274872	0.00403846	0.00370513	0.00301282	0.0288077	0.00241667	0	0.000198718	0.000564103	0.0049359	0.0570513	0.397987	0.0633974	0.0584359	0	0	0	0	0
DG_086	2022	0.0738392	0.164235	0.182659	0.000473411	0.0175681	0.00103113	0.000440986	0.0101686	0.0106809	0.00233463	0.00531777	0.156608	0.371167	0.00786641	0.0186965	0.0138003	0.00305447	0.00667315	0.0561414	0.00639429	0	0.0183787	0.00670558	0.00801556	0.00992866	0.00572633	0.0138586	0.0188262	0	0.0248508	0.00732166	0.0036511	0.0069585	0.0976459	0.00236057	0	0.000473411	0.00315824	0.0311349	0.0865435	0.264533	0.0375681	0.0584825	0	0	0	0	0
DG_042	2022	0.0314248	0.182968	0.154833	0.000144452	0.0276428	0.00208798	0.000479317	0.00956664	0.0148129	0.00343401	0.00523966	0.188831	0.357242	0.00770847	0.03478	0.0187393	0.00286934	0.00719632	0.030696	0.00576494	0	0.0116546	0.00471438	0.00400525	0.00699934	0.00701904	0.0181353	0.0161523	0	0.0165463	0.0100263	0.00578464	0.00862114	0.0761917	0.00544977	0	0.00185817	0.00508207	0.0346815	0.142226	0.212272	0.0463165	0.0427118	0	0.00564018	0	0	0.000354563
DG_224	2022	0.048223	0.231676	0.145459	0.00176351	0.0181554	0.000628378	0.000310811	0.00308784	0.00351351	0.00103378	0.00175676	0.0861014	0.309764	0.00341216	0.00946622	0.00854054	0.00253378	0.00239189	0.0181757	0.00981081	0	0.00820946	0.00452027	0.00489189	0.00731081	0.00419595	0.0100135	0.0119797	0	0.02475	0.00477703	0.00416892	0.00489189	0.0914797	0.00418919	0	0.000641892	0.00233108	0.0181081	0.0801284	0.292946	0.0264662	0.0578851	0.000722973	0.00404054	0	0	0.000398649
DG_002	2022	0.04758	0.199547	0.19018	4e-05	0.0270067	0.00225333	0.00295333	0.00572	0.0206333	0.00444667	0.00375333	0.139607	0.493453	0.00526	0.0305333	0.0153333	0.00212	0.0165333	0.0209067	0.000786667	0	0.0346067	0.00577333	0.0223933	0.00914667	0.00950667	0.0237267	0.0149867	0	0.0182733	0.0135	0.00683333	0.0109867	0.133073	0.00193333	0	0.00133333	0.0092	0.04504	0.0557	0.204967	0.0286067	0.0445933	0.0008	0.00297333	0	0	0.000973333
DG_061	2022	0.0449149	0.202659	0.115885	0.000283554	0.0389099	0.00376812	0.00162571	0.0139382	0.0210712	0.00943919	0.00950221	0.145671	0.509861	0.0104033	0.0512917	0.0286767	0.00297417	0.0108444	0.0280844	0.00178954	0	0.0332577	0.0068242	0.0141651	0.00198488	0.00301827	0.00671078	0.0117265	0	0.0208885	0.00760555	0.00442974	0.00436673	0.12317	0.00147448	0	0.00143667	0.000926276	0.0216383	0.0623693	0.260076	0.03138	0.0473094	0.000812854	0.00756144	0	0.00271582	0.00068683
DG_037	2022	0.0603491	0.343458	0.246344	0.00179183	0.0369433	0.00244401	0.00117918	0.0063307	0.00967062	0.00349802	0.00455863	0.151838	0.406831	0.00557312	0.0274177	0.0149539	0.00241107	0.00498024	0.0223452	0.000671937	0	0.0184321	0.00447958	0.0083004	0.00976943	0.0112385	0.027253	0.0143149	0	0.0137352	0.0156522	0.00463768	0.012029	0.0780303	0.00190382	0	0.00179842	0.0117457	0.0437418	0.073643	0.192181	0.0617852	0.0361989	0.00178524	0.00304348	0	0	0
DG_115	2022	0.0541372	0.236676	0.177988	1.99867e-05	0.0221519	0.00223851	0.00363757	0.00718854	0.0212725	0.00620919	0.00526982	0.0947702	0.46022	0.0038441	0.0292871	0.0157828	0.00213857	0.00312458	0.0177215	0.0041439	0	0.06996	0.00547635	0.029054	0.00996669	0.0064024	0.0156962	0.0173751	0	0.0174284	0.00926716	0.0106995	0.0113391	0.25056	0.00588274	0	0.000606262	0.00415723	0.0560093	0.0559893	0.0708528	0.0187941	0.0381879	0.00177881	0.013984	0	0.0107662	0.00663558
DG_144	2022	0.0606147	0.158011	0.173146	0.000515532	0.0340714	0.00354924	0.000839392	0.00559154	0.0105486	0.00311963	0.00457369	0.144276	0.399795	0.00854594	0.030119	0.0201983	0.0021811	0.0140846	0.0263781	0.00032386	0	0.0246398	0.00840053	0.0138268	0.00972902	0.0161996	0.0351355	0.0153999	0	0.0136286	0.0225975	0.00583609	0.0123596	0.0715929	0.0139987	0	0.0030998	0.0167217	0.0440251	0.0922208	0.16729	0.0209055	0.0337079	0	0.00159947	0	0	0
DG_127	2022	0.050281	0.263575	0.189725	3.92157e-05	0.028451	0.00307843	0.000823529	0.0144118	0.0131176	0.00403268	0.0070719	0.207908	0.711255	0.00727451	0.0263725	0.0175686	0.0029281	0.0190065	0.0301046	0.00150327	0	0.0221176	0.00598693	0.00679085	0.00456863	0.00411111	0.0101176	0.0125752	0	0.0182092	0.00670588	0.00527451	0.00545098	0.106993	0.00335294	0	0.000849673	0.00230719	0.0213922	0.0761046	0.231693	0.0303856	0.0435425	0.00257516	0.00692157	0	0	0.027634
DG_151	2022	0.0269715	0.109549	0.0682372	0.000543406	0.0112392	0.000550033	0.00045063	0.00590457	0.00640159	0.00225977	0.00282969	0.0861829	0.280755	0.00548045	0.0100066	0.00998012	0.00275679	0.00351889	0.024228	0.00541418	0	0.00872763	0.00387674	0.0041617	0.00385686	0.00992048	0.0241551	0.0142346	0	0.0193506	0.012326	0.00362492	0.00941683	0.0724718	0.00263751	0	0.00134526	0.00891981	0.0308748	0.0446985	0.220769	0.0361431	0.0470842	0.00158383	0.00745527	0	0.000788602	0.00235918
DG_157	2022	0.0893553	0.132579	0.1038	0.00183128	0.0353909	0.00273663	0.00542524	0.00794925	0.0302126	0.00869684	0.00755144	0.0975857	0.456289	0.00501372	0.0439506	0.0266941	0.00521262	0.00564472	0.0214266	0.000384088	0	0.111886	0.010096	0.0599794	0.00908779	0.00418381	0.0121948	0.0134705	0	0.0164403	0.00845679	0.00688615	0.00727023	0.146303	0.00104252	0	0.00120713	0.00260631	0.0389163	0.0428258	0.177099	0.0381481	0.039856	0.00133059	0.00995199	0	0.00288752	0.000685871
DG_129	2022	0.0370604	0.381711	0.310468	0.00158181	0.0324915	0.00287848	0.00103191	0.00761032	0.0100339	0.00422946	0.00426341	0.14239	0.49501	0.00717583	0.0291718	0.0184046	0.00193483	0.00693822	0.0358452	0.00238289	0	0.0180244	0.00641548	0.00913103	0.0112288	0.00393754	0.0109233	0.0127902	0	0.0150102	0.00669382	0.00524779	0.00628649	0.133035	0.00766463	0	0.000984386	0.0020095	0.0334148	0.096239	0.15964	0.0222132	0.0385064	0.00199593	0.00486762	0	0	0
DG_187	2022	0.0407397	0.114855	0.176389	0.000201748	0.0281574	0.00303968	0.00073302	0.0167653	0.0286617	0.00844654	0.00848016	0.19887	0.652764	0.0101816	0.0377471	0.024694	0.00402152	0.0258843	0.0306254	0.000309348	0	0.0294082	0.0113114	0.0150975	0.00162071	0.00553463	0.0120444	0.0102892	0	0.0158305	0.0102959	0.00397445	0.00445192	0.062885	0.00360457	0	0.000934768	0.00650303	0.0178009	0.0547747	0.232145	0.0288164	0.0348487	0	0	0	0	0
DG_113	2022	0.0289921	0.112642	0.168142	0.000204216	0.0227404	0.0022859	0.00071805	0.00939394	0.0116733	0.00369565	0.00551383	0.182563	0.573986	0.006278	0.0220949	0.012108	0.00200922	0.0168314	0.0233202	0.00444005	0	0.0238274	0.00762187	0.0131752	0.00193017	0.00213439	0.00415679	0.00774704	0	0.0142029	0.00368248	0.00242424	0.00231225	0.0225494	0.0106522	0	0	0.000638999	0.00625165	0.159427	0.202036	0.0241238	0.0338472	0.000685112	0.00323452	0	0	0.000665349
DG_212	2022	0.0297521	0.148417	0.139803	0.00167832	0.0486078	0.00502225	0.00137953	0.00760331	0.0232104	0.00481882	0.00352193	0.159784	0.39506	0.0143166	0.0448061	0.0286459	0.00366179	0.00876033	0.0492943	0.00303878	0	0.037864	0.00591227	0.0180992	0.00727908	0.00245391	0.00632549	0.00880483	0	0.0162111	0.00745073	0.00283535	0.00284806	0.062918	0.00370629	0	0	0.00137953	0.0121043	0.0601399	0.237959	0.0233058	0.0387667	0	0.0018309	0	0	0.00027972
DG_170	2022	0.0257532	0.16212	0.179714	0.000245399	0.0290729	0.00312202	0.00064758	0.0130061	0.0184663	0.00458759	0.00561009	0.153054	0.41242	0.0115746	0.0302999	0.0167825	0.00328562	0.00586912	0.0590729	0.00527607	0	0.0165235	0.00506476	0.0056987	0.00148603	0.00447171	0.0107498	0.0122972	0	0.0161963	0.0070075	0.00404908	0.00466939	0.0265781	0.00265849	0	0.000415815	0.00288344	0.0126994	0.118207	0.195821	0.0286776	0.0378937	0	0	0	0	0
DG_033	2022	0.0217996	0.200683	0.12275	0.000229738	0.0120613	0.000976388	0.000229738	0.0157435	0.00772176	0.00214422	0.00613912	0.137435	0.333357	0.0064582	0.0159541	0.00728143	0.00184429	0.00435227	0.0347288	0.0111168	0	0.00959796	0.00301213	0.00377154	0.000855137	0.00214422	0.00491385	0.00791959	0	0.017792	0.00280791	0.00323548	0.00239311	0.0337141	0.00132738	0	0	0.000765795	0.00592853	0.0465922	0.235909	0.0309126	0.0406509	0	0.00340779	0	0	0
DG_071	2022	0.014499	0.0923995	0.0471985	0.000491385	0.0124378	0.000816847	0.000280791	0.00364391	0.00432674	0.000893427	0.00152521	0.120638	0.31873	0.00317805	0.00871091	0.00462668	0.00162093	0.00794512	0.0158902	0.0010083	0	0.00707722	0.00304403	0.00309509	0.00459477	0.0117677	0.0294512	0.0111934	0	0.00968092	0.0142629	0.003612	0.00929802	0.0435546	0.0073261	0	0.00107849	0.0111423	0.0280472	0.0971538	0.0953478	0.0152585	0.0240268	0	0	0	0	0
DG_215	2022	0.0257735	0.0977875	0.138628	0.001115	0.0162697	0.00119673	0.000531232	0.00744308	0.0052948	0.00190309	0.00412726	0.1092	0.504209	0.00242265	0.0107531	0.00706363	0.00183304	0.00174548	0.0141681	0.0337712	0	0.0187799	0.00660245	0.0137128	0.00718622	0.00539405	0.0119089	0.00940455	0	0.00988325	0.0075073	0.00313485	0.00511967	0.040467	0.00974314	0	0.000782253	0.00424402	0.0169002	0.0981086	0.0959837	0.0177233	0.0242148	0.00154116	0.0128021	0	0.00580852	0.000974898
DG_145	2022	0.058479	0.234825	0.182939	0.000247763	0.0195939	0.00174123	0.000295939	0.0129525	0.00707502	0.00231934	0.00587061	0.177777	0.529525	0.0049415	0.0152581	0.00798348	0.00216105	0.0036201	0.0211356	0.00310392	0	0.0141087	0.00317963	0.00496903	0.00154164	0.00431521	0.0100757	0.00942189	0	0.0101721	0.00591879	0.0046318	0.00433586	0.0249415	0.00324157	0	0.000846524	0.00405368	0.0142189	0.0771783	0.137288	0.0189126	0.0252374	0	0.00285616	0	0.00130764	0
DG_106	2022	0.0508638	0.286942	0.243859	0.000189155	0.0452459	0.00501892	0.00150063	0.0109584	0.0225914	0.00551072	0.00791929	0.162188	0.575177	0.0138525	0.0561286	0.0335687	0.00530265	0.00972888	0.0563682	0.00192938	0	0.0384615	0.0101198	0.0218411	0.0105044	0.00251576	0.0082913	0.00708071	0	0.00880832	0.00856873	0.00418033	0.00288146	0.0640794	0.00383354	0	0.000598991	0.00192938	0.0145019	0.0531652	0.0997037	0.0288777	0.0219546	0.000876419	0.00496847	0	0.00138714	0.000598991
DG_186	2022	0.0375197	0.183675	0.191024	0.000249344	0.0342979	0.00295932	0.000761155	0.0139173	0.0196391	0.00496719	0.00866142	0.168563	0.403136	0.00872703	0.0374016	0.0186942	0.00307743	0.00992126	0.0377362	0.0136024	0	0.0210039	0.00470472	0.00878609	0.00130577	0.00136483	0.00389108	0.00541995	0	0.00977034	0.00502625	0.00261811	0.00139108	0.0171588	0.00185039	0	0.00019685	0.000728346	0.0053937	0.0431102	0.163228	0.0217388	0.0236483	0	0.00249344	0	0.00118766	0.000328084
DG_197	2022	0.0337185	0.213338	0.11938	5.8102e-05	0.0204067	0.00162686	0.00045836	0.00946417	0.011827	0.00334409	0.00478373	0.129948	0.4494	0.00815365	0.0229374	0.0158037	0.00300194	0.00565526	0.0332279	0.000987734	0	0.0128276	0.00465462	0.00538412	0.0119496	0.00754035	0.0222466	0.00964493	0	0.00606198	0.0128986	0.00582957	0.00794061	0.0445126	0.00142027	0	0.00137508	0.00910265	0.0294642	0.034532	0.0659006	0.0175468	0.0162621	0	0	0	0	0
DG_063	2022	0.02876	0.24138	0.184773	0.00163333	0.0197267	0.0016	0.000293333	0.00418	0.00496	0.00180667	0.00226	0.11092	0.362373	0.00528667	0.0121733	0.0196267	0.01436	0.00567333	0.0275333	0.000933333	0	0.00361333	0.00581333	0.00582	0.00824	0.00332667	0.01032	0.00381333	0	0.00142	0.00561333	0.157787	0.00256667	0.01412	0.000753333	0	0.000513333	0.00291333	0.00845333	0.00974	0.0120533	0.0388067	0.00462667	0.00158667	0	0	0	0
DG_175	2022	0.070672	0.0698802	0.0796407	0.000219561	0.0321357	0.00443114	0.00167665	0.0200798	0.0291683	0.00775116	0.00952761	0.185788	0.563799	0.0134398	0.0407252	0.0272122	0.00422488	0.00725216	0.0400466	0.000685296	0	0.036487	0.0074185	0.0186028	0.00191617	0.000738523	0.0029674	0.00294744	0	0.00605456	0.00574185	0.00420492	0.000671989	0.0161144	0.00245509	0	0	0.000665336	0.00272788	0.0575582	0.0928343	0.0324218	0.0143247	0	0	0	0	0
DG_139	2022	0.0709109	0.0880233	0.0627713	0.00166667	0.0293023	0.00195736	0.00118863	0.00786822	0.0192119	0.0051615	0.00449612	0.124587	0.44865	0.00812016	0.0296447	0.0166796	0.00374677	0.00399225	0.0362597	0.00302972	0	0.0276615	0.0127519	0.0192119	0.0114276	0.00133721	0.00594315	0.00242894	0	0.00294574	0.00512274	0.00388889	0.00105943	0.0184173	0	0	0.000639535	0.00150517	0.00516796	0.00768734	0.0293023	0.0470607	0.00810078	0.00204134	0.00370155	0	0	0.000264858
DG_225	2022	0.0309381	0.0632003	0.0506387	0	0.0115303	0.00101796	0.0010978	0.00547572	0.0131138	0.00374584	0.00387226	0.0809182	0.557099	0.00272788	0.0151564	0.00916833	0.00176314	0.00202927	0.0154824	0.000884897	0	0.0175316	0.00697937	0.0141583	0.00789088	0.0104923	0.0325882	0.00375915	0	0.000405855	0.0167265	0.00177645	0.00503659	0.00367265	0	0	0.00196274	0.00944112	0.00906853	0.00110446	0.00121756	0.0106121	0.00166999	0	0	0	0	0.000725216
DG_222	2022	0.0251287	0.130205	0.130944	0.000435644	0.0213531	0.00213861	0.00019802	0.00333993	0.00448185	0.00175578	0.00211881	0.115512	0.445254	0.00621782	0.0135314	0.00965677	0.00308911	0.00174917	0.0233201	0.000851485	0	0.00284488	0.00575578	0.00154455	0.0060198	0.00434983	0.0131683	0.00234983	0	0.000310231	0.00747855	0.00234323	0.00245545	0.00377558	0.000508251	0	0.000587459	0.00465347	0.00619802	0.00126073	0.00184158	0.0532805	0.0010033	0	0	0	0	0.000270627
DG_179	2022	0.0371946	0.1481	0.145436	0.00149968	0.0244667	0.00234001	0.000277957	0.0032967	0.00783452	0.00249515	0.00246283	0.135113	0.415145	0.00365869	0.0181125	0.0108209	0.00163542	0.00166774	0.0118423	0.00201034	0	0.0126761	0.00831286	0.00892049	0.010905	0.000943762	0.00379444	0.00130575	0	0.000614092	0.00326438	0.00170006	0.00070459	0.00592114	0	0	0	0.00123465	0.00445378	0.00177117	0.00445378	0.0634971	0.00192631	0	0	0	0	0
DG_133	2022	0.0845393	0.208776	0.212555	0.000215198	0.0115804	0.000961668	0.000174849	0.00807666	0.00472764	0.00237391	0.00484196	0.198547	0.495245	0.0039341	0.00809684	0.0095158	0.00530599	0.00449899	0.0193342	0.0207196	0	0.00266308	0.00854069	0.00329523	0.00248823	0.00206456	0.00556153	0.00216543	0	0.00152656	0.0038534	0.00204438	0.00116342	0.00530599	0	0	0.000464022	0.00214526	0.00365165	0.00426362	0.0253531	0.0302085	0.00414257	0	0	0	0	0
DG_102	2022	0.062702	0.231015	0.164512	0.000193924	0.0283193	0.00319974	0.000271493	0.0129476	0.0112476	0.00563672	0.00787977	0.144337	0.590323	0.00740142	0.0221138	0.0134324	0.00285714	0.00371041	0.0376277	0.00259858	0	0.0105495	0.0165869	0.00764706	0.00259211	0.000555915	0.00257272	0.0012799	0	0.000904977	0.00351002	0.00228184	0.000549451	0.002883	0	0	0.00021978	0.000840336	0.00180349	0.00207498	0.00843568	0.0611441	0.0022883	0.00624434	0.0424758	0	0.0229541	0.00258565
DG_097	2022	0.0301585	0.155925	0.105588	7.26552e-05	0.0140225	0.00133421	0.000204756	0.00344122	0.00498679	0.00249009	0.0022391	0.0800462	0.264472	0.00548217	0.0116711	0.00797226	0.00249009	0.00227873	0.0243725	0.00892338	0	0.0034148	0.00385733	0.0018428	0.00798547	0.00620211	0.0203038	0.00269485	0	0.000429326	0.0094716	0.00192206	0.00285997	0.00300528	0	0	0	0.00640026	0.00562087	0.00243725	0.00206737	0.0242668	0.00107001	0	0	0	0	0
DG_085	2022	0.0388917	0.156489	0.103069	0.000390775	0.0117233	0.000679052	0.000198591	0.00497117	0.00704036	0.00224215	0.00203716	0.0911723	0.248892	0.00518898	0.0129468	0.0093786	0.00221012	0.0023959	0.0223831	0.00151826	0	0.00387572	0.00569507	0.00256246	0.00711723	0.000256246	0.00144779	0.000518898	0	0.0004164	0.0021845	0.00144138	0.000320307	0.00341448	0	0	0	0.000467649	0.00174888	0.00158873	0.00336963	0.0629725	0.00154388	0	0	0	0	0
DG_040	2022	0.071646	0.38083	0.303351	0.000176355	0.0212018	0.00201829	0.000502939	0.00863488	0.0119334	0.00399086	0.00468975	0.118158	0.518955	0.00637492	0.0203201	0.0146832	0.00368387	0.00289353	0.0264533	0.000607446	0	0.0120836	0.00854997	0.00926192	0.00951666	0.000463749	0.0031744	0.0010712	0	0.000822992	0.00344873	0.00282169	0.000352711	0.00608099	0	0	0	0.000502939	0.00195297	0.00274331	0.00621163	0.046597	0.00267799	0	0	0	0	0
DG_142	2022	0.0431871	0.27584	0.200411	0.0019671	0.0175942	0.000815627	0.000260452	0.00424263	0.00322824	0.00148047	0.00201508	0.108924	0.357231	0.0039342	0.00867032	0.00617546	0.00188485	0.00150103	0.0205689	0.00525703	0	0.00371487	0.00716929	0.00156271	0.0087183	0.00137766	0.00553804	0.00141878	0	0.000774503	0.00320768	0.00337903	0.000973269	0.00758053	0.000287868	0	0	0.00158328	0.00324195	0.00524332	0.00671693	0.0341261	0.00250857	0.000541467	0	0	0	0.00130226
DG_118	2022	0.0399622	0.131551	0.214294	0.000390921	0.0187957	0.0017087	0.00017024	0.00808953	0.00571879	0.00186633	0.00428121	0.170082	0.61034	0.00749685	0.0147478	0.0139155	0.00598991	0.00361917	0.0446721	0.00221311	0	0.00610971	0.0110404	0.00332913	0.00588272	0.00131778	0.00474779	0.00179067	0	0.00178436	0.00327238	0.00241488	0.000706179	0.0089029	0	0	0	0.00117907	0.00369483	0.00965952	0.0202963	0.0129256	0.00509458	0	0.00874527	0	0.000825977	0.00196091
DG_066	2022	0.103431	0.229319	0.251415	0.000226969	0.0566222	0.00751001	0.000881175	0.0130975	0.0243591	0.0073231	0.00864486	0.218999	0.710614	0.0117557	0.0426168	0.0258077	0.00577437	0.00594126	0.0442457	0.000493992	0	0.0308611	0.0184446	0.02502	0.005247	0.000754339	0.00364486	0.00199599	0	0.0018024	0.00570761	0.00311081	0.000714286	0.00705607	0	0	0.000313752	0.00131509	0.00286382	0.00526702	0.0229306	0.0135781	0.00570093	0	0.00597463	0	0	0.000393858
DG_183	2022	0.0548308	0.242382	0.239827	0.0020438	0.0409224	0.00433311	0.000510949	0.010219	0.0228202	0.00528202	0.00597877	0.194552	0.652435	0.00830126	0.0320637	0.0310617	0.0121367	0.00678169	0.0389847	0.000391506	0	0.015574	0.0118447	0.0131121	0.00976111	0.000716656	0.00347711	0.00163902	0	0.00103517	0.00511612	0.00238222	0.000630392	0.00835435	0	0	0	0.000975448	0.0029927	0.00177173	0.00800929	0.0353218	0.00246848	0	0	0	0	0
DG_091	2022	0.0391296	0.391788	0.224885	0.00191633	0.0164305	0.000249663	0.000168691	0.00492578	0.00411606	0.00165317	0.00238866	0.0915587	0.307402	0.0041363	0.0080027	0.00566802	0.00170715	0.00205803	0.0312821	0.0362618	0	0.00367072	0.00491903	0.00143725	0.00959514	0.000755735	0.00369096	0.00186235	0	0.00099865	0.00232119	0.00404858	0.000620783	0.00914305	0	0	0	0.00104588	0.00245614	0.00188259	0.00878543	0.0236235	0.00311741	0.00149798	0	0	0	0
DG_171	2022	0.0345066	0.173921	0.0755395	0.000243421	0.0262829	0.00317105	0.000835526	0.00872368	0.0190789	0.006375	0.00640132	0.164632	0.586974	0.00478947	0.0260987	0.0137895	0.00186842	0.00359211	0.0141118	0.00102632	0	0.0250658	0.00794737	0.0167237	0.00115789	0.000434211	0.00241447	0.00130263	0	0.00140132	0.00321711	0.00196053	0.000342105	0.00451974	0	0	0.000177632	0.000796053	0.00238158	0.00600658	0.0183224	0.0155658	0.004	0	0.00376316	0	0	0
DG_166	2022	0.0846931	0.17262	0.171558	0.000462046	0.0204554	0.00208581	0.000118812	0.00508251	0.00589439	0.00167657	0.00275248	0.120026	0.419637	0.00534653	0.0121122	0.00947855	0.00322112	0.0019802	0.0337822	0.000785479	0	0.0049769	0.00627063	0.00248845	0.00492409	0.000343234	0.0020462	0.000930693	0	0.000712871	0.00242244	0.00160396	0.000409241	0.00440264	0	0	0	0.00049505	0.00188779	0.00176238	0.00541914	0.0321716	0.00153795	0	0.0105347	0	0	0.000442244
DG_105	2022	0.0445575	0.202769	0.193021	0.000107459	0.0207206	0.00204804	0.000158028	0.00810999	0.0104678	0.00274968	0.00368521	0.162838	0.469463	0.00945638	0.0168142	0.017244	0.00546144	0.0021555	0.0377244	0.00068268	0	0.00386852	0.0107143	0.00286346	0.00671302	0.000758534	0.00375474	0.000960809	0	0.000322377	0.00329962	0.0023641	0.000391909	0.00336915	0	0	0	0.00127686	0.00184576	0.00209229	0.00266751	0.0299052	0.00132743	0	0.00602402	0	0	0
DG_022	2022	0.0526434	0.646229	0.579492	0.000191167	0.0380092	0.00521424	0.000362558	0.0124127	0.0143837	0.00572841	0.00823336	0.180751	0.443612	0.0128873	0.0298022	0.0206856	0.00533949	0.00398154	0.0448649	0.0219117	0	0.0114568	0.0122017	0.00951879	0.00162162	0.000830587	0.00288728	0.00168754	0	0.000969018	0.00504285	0.00185234	0.000593276	0.00276203	0	0	0	0.0012261	0.00208965	0.00585366	0.0115623	0.0102439	0.00306526	0.0014766	0.0105339	0	0.00413975	0.00112063
DG_035	2022	0.0665266	0.211937	0.195023	0.000177282	0.0239068	0.00274458	0.000282337	0.00846356	0.00961261	0.00507551	0.00472095	0.119468	0.45654	0.00617203	0.0181418	0.0110571	0.00321733	0.0026264	0.0278004	0.000991464	0	0.00917269	0.00701248	0.00611293	0.00199606	0.000518713	0.00210112	0.00108995	0	0.00150361	0.00273145	0.00182534	0.000361129	0.00382141	0	0	0	0.000722259	0.00173342	0.00409061	0.0182009	0.00811556	0.00371635	0	0	0	0	0
DG_055	2022	0.0848862	0.09024	0.0868862	6.76923e-05	0.0271569	0.00289846	0.000818462	0.00683692	0.0164062	0.00637538	0.00678154	0.140172	0.485526	0.00486769	0.0225108	0.0131508	0.00256	0.00312	0.0220123	0.000535385	0	0.0242523	0.00863385	0.0149231	0.00488	0.00201846	0.00682462	0.00151385	0	0.000713846	0.00571077	0.00231385	0.00139077	0.00567385	0	0	0	0.00235692	0.00390769	0.00136615	0.00574769	0.00224	0.00233231	0	0.00468308	0	0	0
DG_024	2022	0.0295219	0.211853	0.238206	0.000170269	0.0177538	0.00144073	0.000176817	0.0108972	0.0108972	0.00156516	0.00429601	0.172862	0.501113	0.00571054	0.0141978	0.00886051	0.00283563	0.00392927	0.0238769	0.00222004	0	0.0034905	0.00489849	0.001611	0.000975769	0.000222659	0.00161755	0.00102161	0	0.000779306	0.00208251	0.00263261	0.000176817	0.00285527	0	0	0	0	0.00131631	0.00759005	0.00848723	0.0129666	0.00220039	0	0.00351015	0	0	0
DG_089	2022	0.0256373	0.108804	0.0532983	0.000262812	0.0142576	0.000492773	0.000269382	0.00363338	0.00410644	0.00187254	0.00157687	0.0961892	0.238311	0.00423784	0.00918528	0.00845598	0.00406045	0.00270039	0.0181866	0.00406702	0	0.00243101	0.00341656	0.00189225	0.00576216	0.00124836	0.00595926	0.00145861	0	0.000735874	0.00303548	0.00189225	0.000808147	0.00490145	0	0	0	0.00142576	0.00189882	0.00275953	0.00591984	0.00876478	0.00261498	0	0	0	0	0
DG_081	2022	0.0300579	0.119659	0.0662613	3.861e-05	0.011036	0.000778636	0.00010296	0.0031982	0.00290219	0.00129987	0.0016538	0.131364	0.242671	0.00515444	0.00505792	0.00511583	0.00219434	0.00147362	0.0279987	0.00115187	0	0.00167954	0.00386744	0.000836551	0.00893179	0.00102317	0.00544402	0.00133848	0	0.000720721	0.00222008	0.00201416	0.000662806	0.00438867	0	0	0	0.00111969	0.00215573	0.00425997	0.00628057	0.00615187	0.00230373	0	0	0	0	0
DG_114	2022	0.0446863	0.227072	0.280771	5.22876e-05	0.00812418	0.000627451	0.000130719	0.00556209	0.00496732	0.00184314	0.00402614	0.0785098	0.371425	0.00479085	0.00694118	0.00601307	0.00190196	0.00183007	0.0274052	0.107922	0	0.0029281	0.00864052	0.00169281	0.00575817	0.00105882	0.00392157	0.00104575	0	0.000522876	0.00253595	0.00201961	0.00069281	0.00415033	0	0	0.000294118	0.00101307	0.00177124	0.00424183	0.00324183	0.00975163	0.00171895	0.00116993	0.0131503	0	0.00850327	0.00182353
DG_079	2022	0.0371779	0.0525562	0.0640695	0.000136333	0.0104976	0.000777096	0	0.00486708	0.00430811	0.00148603	0.00237219	0.13516	0.410716	0.00277437	0.00732106	0.0134356	0.0107498	0.00544649	0.0157737	0.00215406	0	0.0039741	0.00649625	0.00661895	0.00297887	0.000224949	0.00173824	0.00112474	0	0.000599864	0.00124063	0.00167007	0.000272665	0.00425358	0	0	0	0	0.00109066	0.00213361	0.00722563	0.00824131	0.0025426	0	0	0	0	0
DG_037	Post	0.138736	0.0334566	0.0412845	0.00137861	0.0125084	0	0.00529926	0.0110222	0.00973773	0.00567586	0.00636853	0.198178	0.600444	0.00347007	0.0135709	0.00858104	0.00314728	0.00219233	0.0167653	0.00160726	0.00833894	0.027041	0.00504371	0.0142367	0	0.00953598	0.0277202	0.012226	0.0117552	0.0186819	0.0153396	0.00401479	0.0132414	0.18998	0.00279085	0.00263618	0.00065232	0.0124412	0.0571957	0.0764089	0.435353	0.0156422	0.0550101	0.000295898	0.0060121	0	0	0.000880968
DG_205	Post	0.137188	0.0832483	0.0885638	0.000510067	0.0135638	0	0.00532215	0.0363154	0.0222685	0.0147114	0.0173154	0.116221	0.254074	0.00709396	0.0235168	0.0182013	0.00565772	0.00485906	0.00714094	0.00144295	0.00628859	0.0700268	0.0027047	0.0355436	0	0.00456376	0.00897987	0.00958389	0	0.0196913	0.00740268	0.00320805	0.00425503	0.142228	0.00131544	0.00126174	0.00042953	0.00483221	0.0209799	0.0677517	0.482369	0.0208255	0.0542148	0	0	0	0	0.00104698
DG_032	Post	0.137637	0.0551683	0.0635578	0.000910891	0.0159274	0	0.00543894	0.00823102	0.0153729	0.0060264	0.0060066	0.138304	0.364937	0.00277228	0.0204026	0.0141122	0.00326733	0.00333333	0.00506931	0.00893069	0.00566337	0.0491089	0.00549175	0.0381782	0	0.0153399	0.0305149	0.0114125	0	0.0168317	0.0266073	0.00588119	0.0112145	0.159637	0.00212541	0.00105611	0.00148515	0.0214125	0.0426271	0.0406139	0.36538	0.0121584	0.0418812	0.000244224	0.0109505	0	0.000838284	0.000851485
G1-7720	Post	0.108359	0.0532822	0.0370047	0.000767178	0.0290527		0.00883256	0.0123215	0.0279987	0.0129219	0.00440961	0.137959	0.720047	0.003002	0.0363442	0.0261508	0.00313542	0.00507005	0.0437825	0.0163576	0.00520347	0.115884	0.0081988	0.0927552		0.0263976	0.0507138	0.0191728	0.00982655	0.0118412	0.0458506	0.00447632	0.0212542	0.137051	0.00225484	0.00487658	0.00538359	0.0368512	0.0767845	0.0232355	0.206611	0.0275517	0.0289059	0.00985991	0.0879386	0.0201734	0.151554	0.00883923
DG_115	Post	0.100927	0.027525	0.0234356	0.00104736	0.00709807	0	0.0136091	0.00702468	0.00492328	0.00374249	0.00490327	0.167765	0.385697	0.00223482	0.00656438	0.00559039	0.0018946	0.00141428	0.0106071	0.00998666	0.00867912	0.0177919	0.00465644	0.0102001	0	0.0259039	0.053429	0.0155237	0.0107538	0.00918612	0.0363976	0.00334223	0.0203202	0.108199	0.0017545	0.0030954	0.00204803	0.0359039	0.0713943	0.0230153	0.243049	0.00371581	0.0246498	0.000260173	0.0104336	0	0.000653769	0.00116744
DG_212	Post	0.11404	0.061196	0.0576545	0.00119601	0.011608	0	0.00550166	0.0151163	0.0078804	0.00334884	0.00787375	0.173083	0.322233	0.00442525	0.0131163	0.0115814	0.00355482	0.00366777	0.0165847	0.00337542	0.00619934	0.0128638	0.00495681	0.00869767	0	0.00208638	0.00598007	0.00669103	0	0.0137143	0.00438538	0.0033289	0.00329568	0.129934	0.00121595	0.00160797	0.000325581	0.00232558	0.0193953	0.0360399	0.374757	0.0176877	0.0370897	0.0021794	0.00326246	0.000531561	0.000478405	0.00589369
DG_122	Post	0.233017	0.151141	0.148402	0.00141247	0.0265584	0	0.00620027	0.021565	0.0166844	0.00732095	0.0140053	0.215855	0.546784	0.00753316	0.0245491	0.0222944	0.00736074	0.00414456	0.0136074	0.0170225	0.0063992	0.0271419	0.00602785	0.0161804	0	0.00842175	0.0192706	0.00866711	0.00369363	0.0106366	0.0164987	0.0034748	0.00592838	0.0799337	0.00165782	0.00208223	0.00117374	0.0167838	0.0232692	0.034622	0.327275	0.0147878	0.0289523	0.00680371	0.0116446	0.00246021	0.00232759	0.0259682
DG_118	Post	0.17345	0.12553	0.130969	0.00133721	0.0153036	0	0.0171318	0.013708	0.00761628	0.00364987	0.00839147	0.208999	0.483863	0.00593023	0.016376	0.0124548	0.00456072	0.00385659	0.00952196	0.00120155	0.00820413	0.0132752	0.00530362	0.00742248	0	0.017739	0.0383915	0.0118346	0.000710594	0.0069509	0.0266602	0.00248062	0.0129845	0.0763889	0.00217054	0.00264212	0.00171835	0.0253811	0.0460078	0.0600646	0.229658	0.0133979	0.0214341	0.00315245	0	0.00118863	0	0.00929587
DG_224	Post	0.130819	0.0159654	0.0601731	0.00081225	0.0084221	0	0.00250333	0.0103995	0.00733023	0.00317577	0.00606525	0.135126	0.171032	0.00452064	0.010739	0.0103595	0.00331558	0.00314248	0.0131292	0.00223702	0.00606525	0.0149467	0.0039281	0.010719	0	0.00651798	0.0132956	0.00774301	0	0.0133289	0.0111518	0.00605193	0.00577896	0.119015	0.000765646	0.00105193	0.00105859	0.00880826	0.023988	0.0282823	0.293089	0.0117577	0.0346138	0.00231025	0.00665779	0.000892144	0	0.00821571
DG_223	Post	0.121857	0.066314	0.0721024	0.00113311	0.0150307	0	0.0056587	0.0135017	0.00915358	0.00279863	0.00633447	0.176375	0.29258	0.00416382	0.0146416	0.0130512	0.004157	0.00459386	0.0248601	0.0100683	0.00492833	0.0129352	0.00334471	0.00651195	0	0.0030785	0.00808874	0.00748123	0	0.0129283	0.00646416	0.00352218	0.00348805	0.117276	0.00331741	0.00286689	0.000307167	0.00389761	0.0181092	0.0332014	0.299843	0.0174539	0.0353038	0.00314676	0	0.00157679	0	0.017529
DG_135	Post	0.116147	0.016739	0.0292768	0.000374753	0.0109139	0	0.00318869	0.0333399	0.0171795	0.0201183	0.0152465	0.0899934	0.157364	0.00648915	0.0183366	0.0140894	0.0039119	0.00320842	0.00922419	0.00346483	0.00815253	0.0557068	0.00228797	0.025549	0	0.0153189	0.0361407	0.0120513	0.0188297	0.00827087	0.0227219	0.00309665	0.0121762	0.0854109	0.000473373	0.00101907	0.00114398	0.0256345	0.0482446	0.020881	0.217883	0.017094	0.0264168	0	0.0115253	0	0	0.00118343
DG_125	Post	0.104672	0.054399	0.0451202	0.00112411	0.00801819	0	0.0123977	0.00780377	0.00810916	0.0051332	0.00423002	0.150143	0.342281	0.00447044	0.0130864	0.00962313	0.00309942	0.00243015	0.00344379	0.00506823	0.0088499	0.0233203	0.00541261	0.0166147	0	0.00566602	0.0151527	0.00712801	0	0.0104094	0.010052	0.00445744	0.00558155	0.121442	0.00175439	0.00101365	0.000506823	0.00610786	0.0245484	0.0288109	0.269922	0.0102794	0.0290773	0.000623782	0.00816114	0.000552307	0.001423	0.0302079
DG_155	Post	0.155039	0.0462632	0.0497039	0.000828947	0.0201513	0	0.00315789	0.0204605	0.0290066	0.0182829	0.0117763	0.148237	0.456099	0.00307895	0.0271908	0.0180066	0.00260526	0.00438158	0.176993	0.00899342	0.00515789	0.100079	0.00577632	0.0646447	0	0.0178487	0.0423947	0.0126974	0.0139934	0.005375	0.0306974	0.0128224	0.0139342	0.0939539	0.00474342	0.0138158	0.00407237	0.0293487	0.0601447	0.0308026	0.0943355	0.0236776	0.0154803	0.00194737	0.00961842	0.000664474	0.00113816	0.00815132
DG_130	Post	0.105762	0.0376032	0.0385714	0.00083954	0.00954638	0	0.0031415	0.00588355	0.00544347	0.00320244	0.00328368	0.116777	0.456378	0.00351388	0.0107448	0.0106432	0.00423155	0.00287745	0.0225592	0.0100406	0.00647935	0.0153758	0.00198375	0.00853758	0	0.018849	0.0420921	0.0127556	0.0186662	0.0058497	0.0286662	0.00672309	0.0168111	0.0810359	0.00505755	0.0130129	0.00168585	0.0257346	0.0673257	0.0195193	0.11195	0.00725796	0.0163439	0	0.0181517	0	0	0.000751523
DG_071	Post	0.146264	0.0317799	0.050591	0.000964674	0.00762908	0	0.00612092	0.00872283	0.0045788	0.00169837	0.0063587	0.121257	0.305469	0.00236413	0.00661005	0.00566576	0.00205163	0.00165082	0.0245516	0.00237092	0.00728261	0.00905571	0.00177989	0.00673913	0	0.0269701	0.0570516	0.0133967	0.0136685	0.00440217	0.040231	0.00419158	0.0195041	0.0639606	0.00091712	0.00193614	0.00165761	0.0357405	0.0620992	0.0209918	0.106787	0.00728261	0.0123981	0	0	0	0	0.000788043
DG_074	Post	0.223493	0.0280104	0.169054	0.000790668	0.00779002	0	0.00748542	0.0107259	0.00438756	0.00198315	0.007965	0.14103	0.306481	0.00388205	0.00729747	0.00613091	0.00348671	0.00102398	0.00760855	0.00791316	0.00703176	0.0110888	0.00262476	0.00493195	0	0.0120998	0.0274919	0.00758911	0.0163253	0.00508749	0.0186909	0.00293584	0.00812703	0.0699417	0.0136617	0.014407	0.00149708	0.0184057	0.0304472	0.0692677	0.139469	0.0207971	0.0169216	0	0.0113804	0.00095917	0	0.000602722
DG_208	Post	0.139731	0.063388	0.106579	0.00126724	0.0123178	0	0.0155023	0.0102101	0.0184045	0.0106172	0.00709783	0.173598	0.29455	0.00390676	0.021497	0.0159094	0.00257387	0.00263953	0.0303283	0.0022193	0.00865397	0.0462771	0.00541037	0.027367	0	0.0173342	0.0457255	0.0111031	0.00202232	0.00489823	0.0281681	0.0117531	0.014084	0.0977741	0.00790545	0.00453053	0.00232436	0.024176	0.053782	0.0273867	0.112764	0.00655942	0.0171175	0.00174655	0.00218647	0.000722259	0.00116875	0.00587656
DG_087	Post	0.15711	0.0207571	0.064187	0.00113891	0.0140619	0	0.00321264	0.00880184	0.00863726	0.0034628	0.00689269	0.147986	0.264957	0.00382488	0.0200461	0.014661	0.00267281	0.00427255	0.0472416	0.00223831	0.00718894	0.00942725	0.00221856	0.00410797	0	0.0319026	0.0674589	0.0195523	0	0.00246873	0.048578	0.00808427	0.028499	0.0556485	0.000730744	0.00314022	0.00674128	0.0460171	0.104049	0.0126004	0.0289203	0.00802502	0.00719552	0	0	0	0	0.00129032
DG_173	Post	0.131306	0.0722845	0.0593502	0.000492476	0.0245349	0	0.00392613	0.0113406	0.0603215	0.016067	0.00609439	0.0758208	0.324042	0.00408345	0.0491518	0.0298769	0.00375513	0.00585499	0.0256635	0.156074	0.00688098	0.127941	0.0045212	0.102969	0	0.0227086	0.0500684	0.0131327	0.0094186	0.0047606	0.0418878	0.00554036	0.01671	0.0661902	0.000683995	0.00162107	0.00359097	0.0343365	0.0580917	0.00944596	0.0894391	0.013803	0.0131053	0.00730506	0.0419767	0.0100821	0.0581737	0.0222572
DG_126	Post	0.107354	0.388696	0.278905	0.00137342	0.0201899	0	0.003	0.0114684	0.0141013	0.0043481	0.0043481	0.181722	0.806361	0.0108797	0.0217722	0.0207342	0.0068038	0.00466456	0.0237722	0.0100443	0.00570253	0.0119114	0.00606962	0.00741139	0	0.00766456	0.0195759	0.00760127	0	0.00665823	0.015557	0.00259494	0.00525316	0.0583797	0.0138291	0.00587342	0.00212658	0.0129937	0.0262785	0.073981	0.151342	0.0171392	0.0183608	0.0011962	0.0105127	0.00181646	0.00500633	0.00237975
DG_094	Post	0.117889	0.0384895	0.0663587	0.000883345	0.0129939	0	0.00246797	0.0183142	0.0191099	0.00776129	0.0083412	0.158645	0.230135	0.00699258	0.0223399	0.016116	0.00515172	0.00401888	0.0115307	0.000431558	0.00738368	0.0242953	0.00387728	0.0122454	0	0.0105192	0.0249629	0.00865138	0.0118139	0.00575185	0.0177815	0.00522589	0.00867835	0.0659272	0.0008294	0.000903574	0.00184761	0.0184356	0.0389953	0.0187188	0.167701	0.0191504	0.0181524	0.00450438	0	0.00179366	0	0.0175657
DG_101	Post	0.0986649	0.0352737	0.0505474	0.000627503	0.0120694	0	0.00304406	0.00949266	0.021502	0.0130374	0.00497997	0.105067	0.141275	0.00343124	0.0217557	0.0178505	0.00613485	0.00578772	0.0501936	0.000313752	0.00612817	0.0601402	0.00253004	0.0458879	0	0.0222764	0.0428438	0.0170961	0.00302403	0.0035247	0.0338451	0.00539386	0.0242924	0.0866689	0.000320427	0.00339119	0.00136849	0.0306275	0.0867356	0.00563418	0.0378838	0.0102003	0.00917891	0.00064753	0	0	0	0.0025968
DG_060	Post	0.139953	0.036678	0.0588746	0.000549153	0.0120271	0	0.00315932	0.0101831	0.0180271	0.0136	0.00427797	0.118386	0.116719	0.00545085	0.0183119	0.0150441	0.00458305	0.00404068	0.00696271	0.000345763	0.00688814	0.0385288	0.00212881	0.0233898	0	0.00418305	0.0111661	0.00682034	0	0.0101288	0.00812881	0.00250847	0.00401356	0.0972746	0	0.000325424	0.000549153	0.00484068	0.017139	0.00428475	0.212244	0.0121424	0.0268542	0	0	0	0	0.0016339
DG_058	Post	0.167631	0.0554385	0.0880301	0.00127618	0.00755236	0	0.00981675	0.0155105	0.00344895	0.00140707	0.00859293	0.181001	0.336283	0.00237565	0.00613874	0.00653796	0.00168194	0.00145288	0.015661	0.00596204	0.00652487	0.00632199	0.00538613	0.0046466	0	0.00417539	0.0100131	0.00412958	0	0.00626309	0.00674738	0.00543194	0.00356021	0.0990641	0.000438482	0.00189136	0.000196335	0.00579188	0.019483	0.0139202	0.183979	0.00705497	0.0192343	0.00193717	0.0136387	0.000876963	0	0.00731021
DG_151	Post	0.107928	0.0242497	0.0548606	0.000750332	0.0120385	0	0.00465471	0.0104382	0.0185126	0.0110359	0.00662683	0.12328	0.27678	0.00492032	0.0219987	0.0165272	0.00335325	0.00477424	0.0122643	0.00819389	0.00662019	0.0455445	0.00488048	0.0285657	0	0.0190372	0.0417995	0.0112683	0.00476096	0.00375166	0.0328685	0.00571713	0.0163147	0.0628884	0.000292165	0.00103586	0.00210491	0.0278951	0.0588446	0.00413015	0.0608101	0.0108566	0.00942895	0.00345286	0.00422975	0.00191899	0.00377822	0.0144489
DG_154	Post	0.0970234	0.0124816	0.0332642	0.000849498	0.0239732	0	0.00398662	0.0087893	0.0381271	0.0109097	0.00551171	0.125926	0.204067	0.00405351	0.0418528	0.0272441	0.00367893	0.00492977	0.0223478	0.00177258	0.00474916	0.0717659	0.00461538	0.0485485	0	0.00972575	0.0261806	0.00728428	0	0.00575251	0.0198997	0.00431438	0.00722408	0.06699	0.00193311	0.00123077	0.00122408	0.016796	0.0302876	0.0277926	0.0987492	0.017612	0.015893	0.00150502	0	0.000682274	0	0.0061806
DG_042	Post	0.124642	0.0522679	0.098866	0.00135942	0.00889257	0	0.00246684	0.0116711	0.00822944	0.00374005	0.00519894	0.203137	0.211293	0.00365385	0.0106897	0.00958223	0.00312997	0.00263926	0.018256	0.0117772	0.00601459	0.0170424	0.00322281	0.00846154	0	0.0112268	0.0283886	0.00931034	0.00248011	0.00398541	0.0177851	0.00344828	0.0106963	0.0384682	0.00103448	0.00231432	0.00365385	0.0164987	0.0399536	0.0300199	0.0875	0.0155637	0.0109947	0.00342175	0	0.00106101	0	0.0151724
DG_086	Post	0.160883	0.0335657	0.0842895	0.000737052	0.00684595	0	0.0039907	0.00982736	0.00646082	0.00581009	0.00595618	0.0895153	0.168997	0.00276892	0.0105046	0.00878486	0.00177291	0.00173307	0.00219124	0.00128818	0.00772908	0.0175232	0.00415007	0.0120452	0	0.00286853	0.00860558	0.00471448	0	0.0062085	0.00553785	0.00306109	0.00310093	0.104807	0.000185923	0.000564409	0.000199203	0.0038579	0.0186321	0.00383134	0.136541	0.00735724	0.0193493	0.000166003	0.0186189	0.000278884	0.00314077	0.000770252
DG_001	Post	0.178114	0.0571886	0.0744384	0.000721579	0.00776038	0	0.00327434	0.0146222	0.00547992	0.00245745	0.00678693	0.117515	0.210994	0.00269571	0.00651464	0.00724302	0.00232811	0.0019469	0.0654731	0.013179	0.00778761	0.00783526	0.00328795	0.00488768	0	0.0125936	0.0340776	0.0109939	0.000721579	0.00321988	0.0193805	0.0091695	0.0131314	0.0762423	0.000245065	0.00431586	0.00115044	0.0201157	0.0574472	0.00715453	0.0461538	0.00507148	0.00812117	0	0	0	0	0.00105514
DG_129	Post	0.172848	0.0136803	0.0529886	0.000779046	0.021585	0	0.00260578	0.0147079	0.0111283	0.012458	0.00969778	0.102666	0.192001	0.00640698	0.0304903	0.0233512	0.00349228	0.00620551	0.0114171	0.0010544	0.00720618	0.0479785	0.00359973	0.0278576	0	0.00514439	0.0126528	0.0046407	0	0.00528543	0.0109738	0.00304231	0.00356615	0.0748758	0.000826058	0.000846206	0.000946944	0.00769644	0.0167226	0.0239288	0.123277	0.00824715	0.0168234	0	0	0	0	0.000933512
DG_144	Post	0.136907	0.0152359	0.038637	0.00100917	0.0143119	0	0.0153604	0.012228	0.0246068	0.00939056	0.00601573	0.163178	0.298093	0.00326343	0.0241612	0.0129948	0.00236566	0.00250983	0.0626671	0.00357143	0.00844692	0.0649672	0.00557012	0.0407208	0	0.0137221	0.0407143	0.00783748	0	0.00222149	0.0231389	0.00545216	0.0102163	0.044574	0.00568807	0.00674967	0.00403014	0.0175688	0.0351048	0.0171101	0.0579817	0.00771298	0.0090367	0	0	0	0	0.000452163
DG_172	Post	0.0606955	0.00736664	0.0233356	0.00114787	0.00689399	0	0.0026266	0.00887914	0.00688724	0.00294396	0.00538825	0.162667	0.219851	0.00328157	0.00739365	0.010844	0.00331533	0.00180284	0.0180149	0.00213369	0.00660365	0.00823768	0.00232275	0.00512492	0	0.00182309	0.00478731	0.00351789	0	0.00520594	0.00409183	0.00390952	0.0018501	0.0617961	0.000438893	0.00105334	0.000175557	0.00232951	0.0111209	0.0153815	0.141094	0.0076975	0.0148886	0.00224848	0	0.000735989	0	0.00955436
DG_105	Post	0.103668	0.0292323	0.0272375	0.00114829	0.00920604	0	0.00566273	0.0101706	0.00935696	0.00300525	0.00624672	0.184613	0.494409	0.0031168	0.00927165	0.00931102	0.00339239	0.00293963	0.0130184	0.00410761	0.00656168	0.0182743	0.0036811	0.00939633	0	0.00495407	0.0117913	0.00551837	0.00521654	0.00336614	0.00889764	0.00410105	0.00576115	0.0494029	0.000958005	0.00204068	0.000538058	0.00878609	0.0271916	0.00815617	0.110827	0.00762467	0.0103412	0.00248031	0.0212336	0.00122047	0.000406824	0.0151115
DG_038	Post	0.0779878	0.0489737	0.0717218	0.00105334	0.00709656	0	0.00248481	0.00667792	0.00430115	0.00268062	0.00384875	0.118987	0.289642	0.0029102	0.0078393	0.00687373	0.00203916	0.00193113	0.00829845	0.00536799	0.00599595	0.0109993	0.00264686	0.00617151	0	0.00561783	0.0150641	0.00567184	0	0.00465901	0.00841323	0.00486158	0.0043214	0.0706347	0.00740041	0.00700878	0.000675219	0.0066239	0.0203714	0.0207833	0.0705402	0.00653612	0.0129034	0.00197164	0.00425388	0.000796759	0	0.00960162
DG_082	Post	0.0915904	0.0167713	0.0546212	0.00146758	0.0154539	0	0.0050785	0.00799317	0.0263208	0.00795222	0.0037884	0.183392	0.180075	0.0039727	0.0266758	0.0177611	0.0034471	0.00495563	0.0168669	0.00153584	0.00551536	0.0299386	0.00295563	0.0197065	0	0.00124232	0.00391126	0.00322184	0	0.00505802	0.00374744	0.00369283	0.00191809	0.0697816	0.000457338	0.00154266	0.00062116	0.00154949	0.0120341	0.0120273	0.111918	0.0136655	0.0139454	0.00241638	0.00849147	0.00107167	0	0.00772014
DG_176	Post	0.0921081	0.0156622	0.0510405	0.00106081	0.0169257	0	0.00321622	0.00879054	0.0202973	0.00768243	0.00526351	0.164851	0.200568	0.00409459	0.0233378	0.0173311	0.00345946	0.00377703	0.035527	0.0065473	0.00556757	0.0435203	0.00383108	0.0312162	0	0.00239189	0.00716216	0.00393919	0	0.00406081	0.00585811	0.00407432	0.00227703	0.0571892	0.00139189	0.0022027	0.000621622	0.00332432	0.0144527	0.0333986	0.0861351	0.00927703	0.0131419	0.00537838	0	0.00258108	0	0.0302162
DG_002	Post	0.0848607	0.0616114	0.0428714	0.000742706	0.0105239	0	0.00584218	0.0081565	0.0107692	0.00683687	0.00394562	0.122341	0.369019	0.00561008	0.0155637	0.013687	0.0035809	0.00344828	0.0372546	0.00190981	0.00589523	0.0179708	0.00317639	0.0129111	0	0.00820292	0.0207095	0.00562334	0.000570292	0.00279841	0.0143369	0.00570292	0.00629973	0.0417175	0.00071618	0.00236737	0.000629973	0.0124867	0.0259085	0.00883289	0.0558156	0.00492042	0.00864058	0.000722812	0.0125597	0	0.000835544	0.00356764
DG_100	Post	0.124886	0.0675631	0.0491225	0.00129419	0.00818813	0	0.0144129	0.0141225	0.00905303	0.00624369	0.00559343	0.179192	0.465177	0.00231692	0.00984848	0.00702652	0.00204545	0.00094697	0.0430051	0.000113636	0.00833965	0.0199874	0.00281566	0.00998106	0	0.00411616	0.0137816	0.00380682	0	0.00306818	0.00720328	0.00573232	0.00386364	0.0534407	0.00159091	0.0061048	0.000271465	0.00572601	0.0169823	0.0114583	0.0715025	0.00570707	0.0105808	0.000145202	0	0	0	0.00138889
DG_041	Post	0.0790219	0.0804891	0.0737967	0.000662806	0.00626126	0	0.0048906	0.00674389	0.00379022	0.00212999	0.00265766	0.100843	0.261763	0.00337194	0.00679537	0.00554698	0.00202703	0.00157658	0.0134492	0.00597169	0.00777349	0.00929215	0.00236165	0.00417632	0	0.00909266	0.0214801	0.00615187	0.000688546	0.00188546	0.0130245	0.00297297	0.00819176	0.0310875	0.000772201	0.00136422	0.0020592	0.0107014	0.02861	0.020399	0.0487259	0.00496139	0.00511583	0.00306306	0.00174389	0.00148005	0	0.0199099
DG_030	Post	0.115677	0.0151708	0.0442641	0.000913272	0.0113403	0	0.00298949	0.0114389	0.0196255	0.0118397	0.00681997	0.116432	0.215184	0.00333771	0.0185808	0.0154139	0.00262155	0.00333114	0.00598555	0.00432326	0.00591984	0.0623587	0.00486859	0.0527201	0	0.00252957	0.00773325	0.00350197	0	0.00345598	0.00610381	0.00450066	0.00233246	0.0519974	0.000578187	0.000742444	0.000400788	0.00394218	0.0117017	0.010611	0.0650854	0.00931669	0.00986202	0.00237845	0.0161235	0.00149146	0.00626807	0.00675427
DG_197	Post	0.653199	0.131201	0.04606	0.00118774	0.00832695	0	0.00385057	0.0117497	0.00611111	0.00229885	0.00466156	0.157165	0.594393	0.00439336	0.00802043	0.00717114	0.00358876	0.00233716	0.0149872	0.00216475	0.00471264	0.0138442	0.00380587	0.00811622	0	0.0109323	0.0237612	0.00718391	0	0.00121328	0.0167944	0.00637931	0.00735632	0.0215134	0.000747126	0.00114943	0.00317369	0.0183589	0.0324521	0.0102171	0.0213282	0.00438059	0.0034802	0.00213921	0	0.000868455	0	0.00872286
DG_007	Post	0.106004	0.0271352	0.0428916	0.00137216	0.0167537	0	0.00572289	0.00991299	0.0151138	0.00794511	0.00698126	0.168199	0.445669	0.0035676	0.0205422	0.0162784	0.00363454	0.004083	0.00811245	0.00690094	0.00556225	0.0401606	0.00463855	0.0285007	0	0.00789157	0.0212651	0.00630522	0.000327979	0.00165997	0.0156359	0.00558233	0.00755689	0.0289625	0.000374833	0.00119813	0.000689424	0.0153146	0.0300535	0.00483266	0.0248327	0.00668005	0.0052008	0.00288487	0.0229183	0.00288487	0.0253012	0.00937751
DG_127	Post	0.11485	0.0705354	0.0562906	0.000956023	0.0200064	0	0.00284895	0.0126004	0.0363225	0.0106055	0.00636074	0.143091	0.37211	0.0026195	0.0329955	0.0206182	0.0037986	0.00391969	0.0365201	0.00289994	0.00633525	0.0832122	0.0043021	0.0500892	0	0.00214149	0.00684512	0.00319312	0	0.00306565	0.00585723	0.00683875	0.00181644	0.0482664	0.00101976	0.00347355	0.000369662	0.00346718	0.00948375	0.00581899	0.0492097	0.0162205	0.00831103	0.00144678	0	0.00096877	0	0.0112173
DG_034	Post	0.153756	0.0872837	0.0449229	0.000851777	0.009222	0	0.0163783	0.0120456	0.00903421	0.0134138	0.00646546	0.118296	0.555654	0.00314554	0.0130516	0.0111066	0.00261569	0.00197854	0.00885312	0.00199866	0.00916834	0.0586989	0.00405768	0.0297116	0	0.0013615	0.0068947	0.00267606	0	0.00183099	0.00363514	0.0074715	0.00149564	0.0467404	0.000570087	0.000838364	0.000536553	0.0025218	0.00995976	0.00520456	0.0424078	0.00751844	0.00655936	0.00633132	0.00603622	0.00337357	0.00228706	0.018444
DG_062	Post	0.115027	0.0910573	0.0552387	0.00104366	0.0061528	0	0.00514325	0.0054161	0.0042292	0.0021487	0.00433834	0.144836	0.506869	0.00269441	0.00836289	0.0118076	0.00614598	0.00190314	0.0189359	0.00385402	0.00646658	0.0056412	0.00231241	0.00592769	0	0.000620737	0.00195089	0.00187585	0	0.00239427	0.00197817	0.00446794	0.00109141	0.0589018	0	0.00212142	0.00058663	0.00161664	0.0106003	0.0042292	0.0437995	0.00242838	0.00618008	0	0	0	0	0.000443383
DG_177	Post	0.0991361	0.0854908	0.0448953	0.000660995	0.0151898	0	0.00545157	0.0153665	0.0250196	0.012212	0.00445681	0.107166	0.333573	0.00468586	0.0218128	0.0170615	0.00446335	0.00392016	0.0345812	0.02875	0.00598168	0.047212	0.00492147	0.0327749	0	0.00151178	0.00361911	0.00262435	0	0.00259162	0.0048233	0.00612565	0.00138089	0.035733	0.000379581	0.00180628	0.000386126	0.00240838	0.0075589	0.00262435	0.0537827	0.00783377	0.0067212	0.00983639	0.076623	0.0160602	0.141918	0.00621073
DG_215	Post	0.168605	0.0632285	0.119637	0.000506156	0.00884405	0	0.00331737	0.00957592	0.00381669	0.00171683	0.00574555	0.09513	0.233235	0.00305062	0.00971272	0.00848153	0.0019357	0.00168947	0.00387141	0.00114227	0.0074829	0.00930917	0.00320793	0.00373461	0	0.00476744	0.0118673	0.00240082	0	0.00182627	0.00780438	0.00222298	0.00215458	0.0301163	0.00116963	0.000991792	0.000478796	0.00648427	0.00798906	0.00750342	0.0389193	0.00528044	0.0055472	0	0	0	0	0.00101915
DG_106	Post	0.102174	0.0764546	0.034493	0.000868125	0.023837	0	0.00267727	0.0105103	0.0408416	0.0120742	0.00600398	0.14438	0.417455	0.00513585	0.0311995	0.0351425	0.0173028	0.00664016	0.0843406	0.00667329	0.00562624	0.0880053	0.0040159	0.0809543	0	0.0013784	0.00387011	0.00223989	0	0.0015772	0.00296223	0.00654076	0.000927767	0.035381	0.00233267	0.00339298	0.000622929	0.00427435	0.00650099	0.00702452	0.0277336	0.0114115	0.00456594	0.000808482	0	0	0	0.0035719
DG_116	Post	0.134563	0.0270611	0.0426693	0.00052597	0.0137212	0	0.00367521	0.0214859	0.0211966	0.00983563	0.0107298	0.110145	0.192176	0.00371466	0.0220973	0.0144905	0.00457594	0.00282709	0.0363182	0.000775805	0.00760026	0.0613149	0.00470085	0.03405	0	0.00374096	0.0100657	0.00271532	0	0.000966469	0.00722551	0.00483235	0.00235371	0.0219198	0.000683761	0.00236029	0.00035503	0.00500986	0.00978961	0.00434583	0.0223866	0.00904011	0.00360289	0.00890861	0.035503	0.00378698	0.000933596	0.0339974
DG_225	Post	0.151545	0.0171881	0.0465215	0.00040264	0.00534653	0	0.00406601	0.00620462	0.00260066	0.00160396	0.00442904	0.0830165	0.26664	0.00213861	0.00570297	0.00545875	0.0029505	0.000924092	0.00481848	0.00320792	0.00760396	0.00679868	0.00429703	0.00227723	0	0.011934	0.0301056	0.00322772	0.00543894	0	0.0183564	0.00128713	0.0049571	0.00341914	0	0.000231023	0.00158416	0.0133069	0.00980198	0	0	0.00133333	0.000514851	0.0236568	0	0.0103564	0.00188119	0.0864356
DG_097	Post	0.152866	0.0324115	0.0460321	0.000761523	0.0204609	0	0.00602538	0.011149	0.0228257	0.0125718	0.00659987	0.134282	0.237949	0.00539746	0.0231062	0.0189178	0.00495658	0.00336005	0.0114763	0.00213761	0.00553774	0.032986	0.00626587	0.0205678	0	0.00888444	0.0218704	0.00395458	0	0	0.0176219	0.00268537	0.00464262	0.0054175	0	0.000621242	0.000480962	0.0126921	0.0106814	0.00160989	0.00570474	0.00433534	0.00159653	0	0	0	0	0.00155645
DG_222	Post	0.140674	0.132403	0.0739508	0.00106218	0.0215544	0	0.00591969	0.00698187	0.0249288	0.0133873	0.00425518	0.134806	0.483141	0.00463731	0.0213666	0.0186269	0.00368523	0.00561528	0.0105311	0.00365285	0.00569301	0.0321438	0.00849093	0.0247474	0	0.00711788	0.0175324	0.00406088	0	0	0.0140026	0.00246114	0.0044171	0.00409326	0	0.000608808	0.000738342	0.00931995	0.0137241	0.000952073	0.00141839	0.00338083	0.000647668	0.000790155	0	0	5.82902e-05	0.00486399
DG_063	Post	0.153989	0.173678	0.0699683	0.00140774	0.016506	0	0.0149081	0.00809765	0.00717819	0.00418516	0.00367153	0.172892	0.729188	0.00504756	0.0103424	0.00879518	0.00388079	0.00195308	0.0185669	0.00455929	0.00758402	0.0056246	0.00504122	0.00325301	0	0.00147749	0.00500317	0.00171845	0.00564363	0.000818009	0.00379201	0.00165504	0.0011097	0.0103488	0.000545339	0.00106531	0.000171211	0.00220672	0.00546607	0.0101776	0.0244451	0.00425491	0.00210526	0	0.0181167	0	0	0.000805327
DG_089	Post	0.286001	0.0980873	0.209653	0.000924262	0.0142811	0	0.0129718	0.00787548	0.00424262	0.00487805	0.00558408	0.153273	0.335719	0.00561617	0.00883184	0.00718228	0.00381258	0.000840822	0.00608472	0.00146341	0.00935173	0.00759307	0.00496791	0.00317073	0	0.00374198	0.0110847	0.00133504	0	0.00050706	0.00636072	0.00147625	0.00139923	0.00767009	0	0.000410783	0.00021181	0.00451861	0.00324134	0.00150834	0.0106418	0.00331836	0.0022208	0.00174583	0	0.000956354	0	0.0102375
DG_023	Post	0.0948339	0.016461	0.0488746	0.000732203	0.00774915	0	0.00280678	0.00823051	0.00319322	0.00246102	0.00437966	0.117546	0.146414	0.00416949	0.00575593	0.00574237	0.0031322	0.00111186	0.00619661	0.0012	0.00687458	0.0035322	0.00350508	0.00161356	0	0.00543729	0.0145153	0.00221695	0	0	0.00918644	0.00147119	0.00248136	0.00475932	0	0	0.00019661	0.00608814	0.00461695	0.00115254	0.00408814	0.00117288	0.00108475	0.000833898	0	0	0	0.00370169
DG_157	Post	0.0982872	0.0105929	0.0237879	0.00103426	0.0114888	0	0.0138406	0.00996706	0.0132082	0.00869565	0.00646904	0.191515	0.285125	0.00373518	0.0140975	0.0100922	0.00224638	0.0021805	0.00520422	0.00485507	0.0101515	0.0285903	0.0028195	0.0100593	0	0.000401845	0.00283926	0.00157444	0	0.000612648	0.00173254	0.00217391	0.000599473	0.0164427	0	0.000461133	0.00016469	0.000764163	0.00318841	0.00210804	0.0131489	0.0040975	0.00229249	0	0.00621212	0	0	0.000909091
DG_081	Post	0.109555	0.0274966	0.0566758	0.00110807	0.00779754	0	0.00232558	0.010212	0.0071751	0.00422709	0.00480848	0.187681	0.180075	0.00362517	0.0075171	0.00687415	0.00270178	0.00206566	0.00889193	0.000170999	0.00536936	0.00767442	0.00286594	0.0043844	0	0.00202462	0.00504104	0.00162791	0	0.000677155	0.00354309	0.00225718	0.00121067	0.0070725	0	0.000430917	0.000184679	0.00186731	0.00332421	0.00302326	0.0105404	0.00136799	0.00197674	0	0	0	0	0.00114911
DG_181	Post	0.157592	0.0193074	0.0694261	0.0012467	0.0126913	0	0.00241425	0.0174274	0.0116029	0.0039314	0.00936675	0.167592	0.211774	0.00622032	0.0149802	0.0140963	0.00558707	0.00529024	0.0101847	0.0078628	0.0051715	0.00712401	0.00789578	0.00364776	0	0.00255937	0.00644459	0.00123351	0	0.000402375	0.00656332	0.00242084	0.00153034	0.00430739	0	0.000540897	0.000349604	0.00442612	0.00466359	0	0.00402375	0.00184037	0.000936675	0	0.00488786	0	0	0.000666227
Deckrot	Post	0.0833707	0.023219	0.0275858	0.0010686	0.0196174		0.00544855	0.008219	0.0132124	0.0138127	0.00450528	0.193555	0.391135	0.00502639	0.0212005	0.0158179	0.0030409	0.00341689	0.00657652	0.00738127	0.00527704	0.022467	0.00552111	0.0130343		0.00248021	0.00689314	0.00161609	0	0.000375989	0.00654354	0.00213061	0.00153694	0.00484828	0	0	0.000204485	0.00260554	0.00432058	0.00102902	0.00351583	0.00187335	0.00073219	0.00436016	0.000547493	0.00200528	0	0.020686
DG_085	Post	0.150827	0.0206481	0.0407672	0.000687831	0.00883598	0	0.0140675	0.00695106	0.00615741	0.00808201	0.00367725	0.133188	0.288558	0.00304894	0.0102976	0.00766534	0.00220899	0.00128307	0.00375	0.00265212	0.00931217	0.00960317	0.0038955	0.00491402	0	0.00138889	0.00609788	0.00112434	0.00983466	0.000244709	0.00290344	0.00157407	0.00104497	0.00440476	0	0.000251323	0.000205026	0.00202381	0.00386243	0.000522487	0.00232143	0.00148148	0.00121032	0	0	0	0	0.000509259
DG_013	Post	0.0712524	0.014788	0.0345662	0.000808871	0.00897586	0	0.00271363	0.00599478	0.00534899	0.00245271	0.00290933	0.117476	0.217756	0.00374429	0.0109263	0.00983692	0.00528376	0.00178735	0.00462492	0.00130463	0.00608611	0.00312459	0.00232877	0.0011546	0	0.00341161	0.00889759	0.00170907	0	0	0.00677104	0.00127202	0.0017743	0.00213307	0	0	0.000208741	0.00424658	0.00508806	0.000737117	0.00114808	0.000515329	0.000574038	0	0	0	0	0.000293542
DG_201	Post	0.0970039	0.0258885	0.0277497	0.000402075	0.0134306	0	0.00273671	0.0126265	0.0182944	0.0138457	0.00474708	0.0954345	0.149014	0.00525292	0.020856	0.0155642	0.00356031	0.00374189	0.00738003	0.00745136	0.00621271	0.0397147	0.00437743	0.0277951	0	0.00131647	0.00409857	0.00134241	0	0.00040856	0.00414397	0.00216602	0.000544747	0.00736706	0	0.000343709	0.000201038	0.00145266	0.00267834	0	0.00542802	0.00431907	0.00201686	0.000706874	0.00653048	0.000881971	0.00205577	0.00247082
DG_104	Post	0.130268	0.0637827	0.0747448	0.00151832	0.00934555	0	0.0107068	0.00556937	0.00475785	0.00186518	0.00291885	0.204162	0.539634	0.00264398	0.00645942	0.0053534	0.00276178	0.0016623	0.00444372	0.00300393	0.00751309	0.00461387	0.00813482	0.00280759	0	0.00241492	0.00764398	0.00135471	0.00645288	0.000137435	0.00477749	0.0013089	0.00111911	0.00225131	0	0.000255236	0.000222513	0.00316754	0.0034555	0	0.00126963	0.00105366	0.00046466	0	0	0	0	0.000811518
DG_047	Post	0.113947	0.0255456	0.049878	0.000539153	0.020706	0	0.00268293	0.0130103	0.0227985	0.0144159	0.00521823	0.104974	0.131001	0.00727856	0.0266303	0.0200449	0.00725931	0.00375481	0.00905648	0.00427471	0.00632863	0.0310141	0.00454429	0.016932	0	0.00084724	0.00295892	0.000969191	0.0122978	0.000288832	0.00456996	0.0016303	0.000442875	0.00323492	0	0	0.000147625	0.00137356	0.00206033	0	0.00198331	0.00314506	0.000866496	0	0	0	0	0.000744544
DG_184	Post	0.0887724	0.0924552	0.0555931	0.00131724	0.0104897	0	0.00294483	0.00545517	0.00776552	0.00306207	0.00328966	0.156766	0.597379	0.00331724	0.00783448	0.00949655	0.00353793	0.00197241	0.00384138	0.00201379	0.00531724	0.00484138	0.00526897	0.00377241	0	0.00225517	0.00553103	0.00122069	0	0.000110345	0.00541379	0.00276552	0.000965517	0.00291034	0	0	0.000296552	0.00288966	0.00344138	0	0.00152414	0.0021931	0.000710345	0	0	0	0	0.000951724
DG_110	Post	0.117773	0.0253745	0.028364	0.00140604	0.0111564	0	0.00747043	0.0147963	0.00767411	0.00442838	0.00749014	0.226932	0.631629	0.00374507	0.0107293	0.0100723	0.00423784	0.00220762	0.00865309	0.00365966	0.00726018	0.007523	0.00750986	0.00550591	0	0.00128778	0.0042707	0.00176084	0	0.000275953	0.00310775	0.00196452	0.000762155	0.00430355	0	0.000321945	0.000190539	0.00220105	0.00386991	0.000400788	0.00352825	0.00141919	0.00088042	0.00237845	0.0206833	0.00107096	0.000289093	0.00848883
DG_114	Post	0.072257	0.00664447	0.0352663	0.000545939	0.00312916	0	0.00352197	0.00780293	0.00611851	0.00593209	0.00338216	0.102377	0.10478	0.00330892	0.00509321	0.00530626	0.00310919	0.00145806	0.00350866	0.00607856	0.00703063	0.00848202	0.00840879	0.00667776	0	0.00257656	0.0073502	0.00112517	0	0.000153129	0.00414115	0.0013715	0.000952064	0.00223702	0	0	0.000139814	0.00314248	0.00253662	0.000665779	0.00117177	0.00113848	0.00045273	0	0	0	0	0.000312916
DG_149	Post	0.0964912	0.102699	0.0644197	0.00108637	0.0115587	0	0.00406208	0.00941296	0.00787449	0.00639676	0.00553306	0.167018	0.463772	0.00433198	0.00947368	0.00923752	0.00374494	0.00200405	0.00609987	0.00485155	0.00611336	0.00726721	0.0084278	0.0070108	0	0.00124831	0.00332659	0.000809717	0	0.000337382	0.00365047	0.00152497	0.000775978	0.00311066	0	0	0.000107962	0.00145074	0.00209852	0.00136977	0.00480432	0.00184885	0.000782726	0.000431849	0	0	0	0.00215924
DG_091	Post	0.1039	0.0717513	0.0544401	0.000872396	0.00890625	0	0.00580729	0.00579427	0.00835938	0.00460938	0.00317708	0.119896	0.450221	0.00328125	0.011237	0.00974609	0.00268229	0.00164063	0.00388021	0.00281901	0.00664714	0.00559245	0.00462891	0.00410807	0	0.00120443	0.00409505	0.000833333	0	0.000299479	0.00371745	0.0013737	0.00063151	0.00427083	0	0	0.000143229	0.00198568	0.00171224	0.000403646	0.00396484	0.00157552	0.00078125	0	0	0	0	0.000527344
DG_055	Post	0.0827273	0.0129392	0.026972	0.000533151	0.0102666	0	0.00304853	0.00797676	0.0120027	0.00769651	0.00365687	0.0981955	0.0939918	0.00336295	0.0130485	0.011039	0.00360902	0.00278195	0.00564593	0.000143541	0.00669173	0.0190841	0.00396446	0.0138961	0	0.000915926	0.00369105	0.000977444	0.00062201	0.000218729	0.00309638	0.00342447	0.000403281	0.00353383	0	0	0.000170882	0.00150376	0.00228298	0	0.00189337	0.00258373	0.000813397	0	0	0	0	0.000806562
DG_046	Post	0.155382	0.0287907	0.051515	0.000956811	0.0139203	0	0.00639203	0.00797342	0.00652492	0.00437874	0.00537542	0.161555	0.390983	0.00685714	0.0159336	0.0157475	0.00497674	0.00249834	0.0112027	0.0033289	0.00817276	0.00621262	0.0034485	0.00247176	0	0.0010299	0.00415282	0.00118272	0	0.000239203	0.00401993	0.00164784	0.000737542	0.00461794	0	0.000312292	0.000186047	0.00215282	0.00362791	0	0.000803987	0.00048505	0.000697674	0	0	0	0	0.000724252
DG_166	Post	0.115419	0.0408053	0.0497228	0.000910891	0.0121782	0	0.00368317	0.00761716	0.0177162	0.010066	0.00293729	0.144462	0.415459	0.00250165	0.0159868	0.0125743	0.00210561	0.00194059	0.00394719	0.00389439	0.00534653	0.0151617	0.00646205	0.0106931	0	0.000785479	0.00291749	0.0010165	0.00111551	0.000191419	0.0030231	0.00165017	0.00049505	0.00434983	0	0	0.000257426	0.00143234	0.00271287	0	0.0029505	0.00155116	0.0010033	0.000884488	0.00837624	0	0	0.0050363
DG_214	Post	0.140701	0.0197182	0.0575885	0.000629096	0.00610747	0	0.0040367	0.00801442	0.00521625	0.00158585	0.00468545	0.107431	0.14713	0.0043709	0.00722805	0.00731979	0.0030865	0.00158585	0.00541284	0.00535387	0.0068021	0.00415465	0.00553735	0.00186107	0	0.00125819	0.00407602	0.000845347	0	0.000216252	0.00291612	0.00134338	0.000707733	0.00277851	0	0	0.000268676	0.00189384	0.00293578	0	0.00156619	0.000707733	0.00059633	0.003519	0	0.00132372	0	0.0147444
DG_168	Post	0.0896522	0.00947826	0.0475719	0.000501672	0.00559866	0	0.00313043	0.00773913	0.0047893	0.00314381	0.0049699	0.102281	0.195331	0.00289632	0.00532441	0.00644147	0.00200669	0.00116388	0.00372575	0.00563211	0.00718395	0.00705017	0.00261538	0.0036388	0	0.00155853	0.00432107	0.000715719	0	0.000147157	0.00313043	0.00149164	0.000909699	0.00275585	0	0	0.000160535	0.00226087	0.00224749	0.000488294	0	0.000628763	0.00038796	0	0	0	0	0.000408027
DG_068	Post	0.152215	0.0751966	0.104292	0.001481	0.0102425	0	0.0075557	0.00803408	0.00267366	0.00107471	0.00489515	0.190518	0.467018	0.00358453	0.00705767	0.00571429	0.00303408	0.00112713	0.00533421	0.000989515	0.00665793	0.00403014	0.00281127	0.00120577	0	0.00174312	0.0049017	0.000897772	0	0	0.0033945	0.00122543	0.000694626	0.00192005	0	0	0.000137615	0.00260813	0.00215596	0	0	0.00100917	0.000478375	0.00116645	0	0	0	0.00560288
DG_183	Post	0.108259	0.0574933	0.0556855	0.0013172	0.0104032	0	0.005	0.0101747	0.00740591	0.00491263	0.0052957	0.160712	0.361378	0.00384409	0.0113105	0.0106922	0.00346102	0.00198253	0.0043078	0.00137769	0.00633065	0.00802419	0.00900538	0.00422043	0	0.00110215	0.00383065	0.000705645	0	0.000147849	0.00321237	0.00170027	0.000490591	0.00218414	0	0	0.000188172	0.00170699	0.0022379	0	0.00155242	0.000947581	0.000409946	0.00137097	0	0.00063172	3.36022e-05	0.00600134
DG_179	Post	0.114294	0.0232124	0.0634745	0.000665323	0.00807796	0	0.00359543	0.00560484	0.00590054	0.00292339	0.00367608	0.1192	0.192863	0.00322581	0.00991935	0.00918683	0.00233199	0.00178091	0.00264113	0.00206989	0.00705645	0.00694892	0.00389785	0.00399866	0	0.000981183	0.00302419	0.000383065	0.00386425	0.00015457	0.00251344	0.00129032	0.000430108	0.00191532	0	0.000127688	0.000174731	0.00170027	0.00242608	0	0	0.000564516	0.000409946	0	0	0	0	0.000288978
DG_146	Post	0.148603	0.055755	0.105695	0.00107285	0.0100993	0	0.00966887	0.00453642	0.00354305	0.00239735	0.00289404	0.139755	0.462887	0.0037947	0.00616556	0.00603974	0.00352318	0.00119205	0.00433113	0.00187417	0.00629801	0.00558278	0.00299338	0.00237748	0	0.00084106	0.00245695	0.00113245	0	0.000238411	0.00216556	0.00144371	0.000417219	0.00278808	0	0	9.27152e-05	0.00143046	0.00253642	0.000774834	0.00219868	0.00084106	0.000503311	0.00264901	0	0.00165563	0	0.0169669
DG_028	Post	0.103536	0.0127935	0.027031	0.0011336	0.00783401	0	0.00334008	0.00458839	0.00537112	0.00195007	0.00304993	0.159318	0.391572	0.00370445	0.0082996	0.00863698	0.00395412	0.00197706	0.00512146	0.00254386	0.00609987	0.00376518	0.00307692	0.00139676	0	0.000330634	0.00205128	0.00109312	0	0.000215924	0.00105263	0.00168016	0.000209177	0.00281377	0	0	0.0001417	0.00082996	0.00170715	0.000607287	0.00257085	0.0011336	0.000944669	0	0	0	0	0.000317139
DG_052	Post	0.113366	0.0403821	0.0481094	0.000803689	0.00531621	0	0.00947958	0.0079249	0.00534256	0.00691041	0.00318841	0.135988	0.234236	0.00261528	0.00513834	0.00540843	0.00239789	0.00131752	0.00285903	0.00359025	0.00934783	0.00575099	0.00512516	0.00423584	0	0.000665349	0.00256258	0.00139657	0	0.000158103	0.0014361	0.00226614	0.000144928	0.00258893	0	0	5.92885e-05	0.000764163	0.00137022	0	0.0014361	0.00124506	0.000619236	0.000316206	0.00694993	0.001278	0.0105731	0.000889328
DG_141	Post	0.160902	0.126445	0.103384	0.000737327	0.010079	0	0.0181896	0.0104477	0.00625411	0.00776169	0.00554312	0.136359	0.385227	0.00352864	0.00830151	0.00639236	0.00240948	0.00107307	0.00272548	0.00352205	0.0107307	0.0095655	0.00650428	0.00541804	0	0.000684661	0.00348255	0.00076366	0	0.000138249	0.00219223	0.00140224	0.00040158	0.00211323	0	0.000131666	0.000171165	0.000994075	0.00171824	0	0	0.00132324	0.000572745	0.00780118	0	0.00431863	0.00109282	0.0323766
DG_098	Post	0.128586	0.0320197	0.0598618	0.000756579	0.0123882	0	0.0117105	0.00435526	0.00500658	0.00305263	0.00354605	0.128743	0.259671	0.00351316	0.00905263	0.00823684	0.00293421	0.00171711	0.00369737	0.00189474	0.00897368	0.00670395	0.00459211	0.00423026	0	0.0005	0.00286184	0.000717105	0	0.000131579	0.00216447	0.00109868	0.000315789	0.00219079	0	0	0.000111842	0.00103947	0.00173026	0	0.00138158	0.000868421	0.000368421	0.00139474	0	0.000592105	0	0.00407237
DG_111	Post	0.0968344	0.00356954	0.0273642	0.000741722	0.00469536	0	0.0158675	0.00790728	0.00492715	0.0042053	0.00564238	0.144742	0.141318	0.00322517	0.00493377	0.00539735	0.00299338	0.000662252	0.00274834	0.0122252	0.0113974	0.00560265	0.00442384	0.00262252	0	0.000456954	0.0022053	0.000761589	0	0.000198675	0.00133113	0.00127815	0.000125828	0.00294702	0	0	0.000119205	0.000860927	0.00150993	0.000390728	0.00128477	0.00123179	0.000596026	0.00562252	0.0261126	0.00296689	0.00131788	0.0147947
DG_115	Pre	0.152523	0.0397306	0.0342576	0.000532194	0.0133968	0	0.0162549	0.00614323	0.0119908	0.0119645	0.00329172	0.10634	0.186524	0.00412615	0.0145269	0.00952694	0.00406045	0.0030092	0.0190867	0.000775296	0.011866	0.0366557	0.00260841	0.0114258	0	0.0504008	0.117904	0.0317937	0.0216294	0.0156307	0.0654796	0.00529566	0.0364258	0.13703	0.00206307	0.00250329	0.00473062	0.0765572	0.131997	0.0137319	0.397398	0.0164192	0.0495861	0	0.0250131	0	0.000289093	0.00449409
DG_037	Pre	0.125639	0.0062786	0.0436205	0.000908479	0.0195693	0	0.00487887	0.0217362	0.0438964	0.017638	0.00975101	0.167773	0.208829	0.00443472	0.0381763	0.0229946	0.00338493	0.0034926	0.00415882	0.00163526	0.00774563	0.10745	0.00499327	0.0584186	0	0.010572	0.0283311	0.0160767	0.00268506	0.0202221	0.019825	0.0048183	0.013607	0.152362	0.00207268	0.0012786	0.000733513	0.0170256	0.0565747	0.0794818	0.53175	0.0457739	0.0556729	0	0	0	0	0.00110363
DG_172	Pre	0.201543	0.0270026	0.112366	0.00137117	0.0155293	0	0.00461097	0.0125829	0.0163839	0.0111352	0.0077551	0.172628	0.236594	0.0075	0.0229719	0.0215306	0.00609056	0.00376913	0.0338903	0.00200255	0.00711735	0.0336352	0.00389668	0.0156378	0	0.00646046	0.0149745	0.0109247	0	0.0212245	0.0113202	0.00577168	0.00623087	0.152328	0.00109694	0.00237245	0.000478316	0.00875638	0.0283227	0.0560842	0.575823	0.0349554	0.0578125	0.00765944	0.00982781	0.0030676	0	0.0322003
DG_125	Pre	0.130839	0.0455772	0.0457248	0.000583893	0.00857718	0	0.0121611	0.00884564	0.012396	0.00668456	0.0044094	0.0941141	0.191651	0.00369799	0.0133087	0.0103826	0.00308054	0.00153691	0.00271812	0.00383893	0.0104228	0.0488523	0.00510738	0.0299799	0	0.00673154	0.0193289	0.00888591	0	0.0157315	0.00998658	0.00394631	0.00622148	0.135651	0.00181879	0.00102013	0.000651007	0.00725503	0.0251477	0.0387651	0.410356	0.0174765	0.0484564	0.000765101	0.00997987	0.000798658	0.00295302	0.00148993
DG_224	Pre	0.150239	0.00800647	0.0385372	0.000355987	0.0239159	0	0.00308738	0.0118382	0.0316958	0.0198576	0.00714563	0.0674304	0.146828	0.00576699	0.047055	0.0286019	0.00532686	0.00560518	0.0346731	6.47249e-05	0.00701618	0.164531	0.00488026	0.126272	0	0.0128803	0.0295146	0.0122201	0	0.0158382	0.0250032	0.00946278	0.0100906	0.160608	0.00132039	0.0030356	0.00205825	0.0181424	0.0404531	0.0234369	0.312453	0.0273398	0.0356764	0.00317799	0	0.00137217	0	0.0100906
DG_208	Pre	0.122951	0.011749	0.0380908	0.00119493	0.00856475	0	0.00486649	0.00951936	0.00910547	0.0038251	0.00633511	0.150915	0.236402	0.00507343	0.0140587	0.0150267	0.00317757	0.00332443	0.0298865	0.014486	0.0075968	0.0129105	0.00325768	0.0068024	0	0.0246796	0.0546328	0.0165087	0.0056008	0.00775033	0.0362617	0.00780374	0.0184312	0.119499	0.00155541	0.00200935	0.00301068	0.0369893	0.0779306	0.0308278	0.188959	0.0154339	0.0214686	0.0113752	0.0105808	0.00457276	0.00413885	0.0337517
DG_122	Pre	0.255718	0.0584929	0.0833894	0.000931436	0.0290298	0	0.00780724	0.0165524	0.0318823	0.0225679	0.0081436	0.173765	0.287012	0.00831824	0.0366365	0.0235252	0.00606727	0.00351876	0.0118111	0.0187581	0.00993532	0.0633571	0.00859638	0.0243855	0	0.0157115	0.0452264	0.0129948	0.0149483	0.00936611	0.0225614	0.00305951	0.00847995	0.0581307	0.001326	0.00182406	0.00214748	0.0281048	0.0289133	0.033163	0.325834	0.0190815	0.0361061	0.0174644	0.0150259	0.0102005	0.0131048	0.0543984
G1-7720	Pre	0.0757114	0.0185101	0.0143289	0.000275168	0.0364161	0	0.0049396	0.013651	0.0505235	0.0311477	0.00714765	0.0598792	0.155604	0.00459732	0.0753557	0.0429396	0.00389262	0.00614765	0.0359799	0.000691275	0.00720134	0.223134	0.00451007	0.165148	0	0.0404966	0.091094	0.0225369	0.0152013	0.00579866	0.0692752	0.00375168	0.0267651	0.0826107	0.00154362	0.00377181	0.00608725	0.0596376	0.0926376	0.00499329	0.0591544	0.0308658	0.0125638	0.00165101	0.0151611	0.00271141	0.0279195	0.0020604
DG_118	Pre	0.147252	0.0426164	0.0531672	0.000852459	0.0132328	0	0.00737049	0.0149443	0.0162689	0.0101049	0.00878689	0.12943	0.211902	0.00935082	0.0187213	0.0183148	0.0071082	0.00348852	0.0131475	0.000393443	0.00843279	0.0286361	0.00464918	0.0132328	0	0.0251279	0.0566754	0.0169574	0.00318033	0.00669508	0.0380984	0.0027541	0.0184393	0.0577115	0.000872131	0.00092459	0.00271475	0.0411148	0.0675016	0.0316131	0.217803	0.016518	0.0180459	0.00504918	0.0145049	0.00149508	0	0.0150295
DG_212	Pre	0.155065	0.0541819	0.078822	0.000477749	0.0240445	0	0.00307592	0.0131348	0.0251702	0.0208835	0.00825262	0.0892277	0.237755	0.00682592	0.0403796	0.0285209	0.00426702	0.00628272	0.0208312	0.00178665	0.00633508	0.12748	0.00486257	0.091178	0	0.00255236	0.00760471	0.00694372	0	0.0141819	0.00831152	0.00785995	0.00403141	0.150759	0.0010144	0.00149869	0.000575916	0.00299738	0.0233639	0.0252356	0.283462	0.0289202	0.0356086	0.00310209	0.00792539	0.00176702	0.0125131	0.00893979
DG_042	Pre	0.191402	0.0210648	0.0897619	0.000654762	0.0209061	0	0.00239418	0.0124405	0.0346958	0.0173413	0.00531746	0.121515	0.151171	0.0059127	0.036045	0.0203241	0.00483466	0.00354497	0.0342857	0.00188492	0.00770503	0.0737434	0.00308862	0.0318188	0	0.0235516	0.0555093	0.0171958	0.00262566	0.0067791	0.0371296	0.0052381	0.0203042	0.0589286	0.0025463	0.00309524	0.00771825	0.0329431	0.0727447	0.0443717	0.138399	0.035086	0.0181283	0.0105093	0	0.00593254	0.00127646	0.0550397
DG_071	Pre	0.207695	0.0313458	0.0519121	0.0005996	0.0111859	0	0.0107462	0.0111459	0.012505	0.00875416	0.0067555	0.111559	0.211619	0.00477682	0.0171752	0.0108661	0.00270486	0.00256496	0.0287275	0.000466356	0.00924717	0.0454364	0.00199867	0.0194337	0	0.0284277	0.0622985	0.0168554	0.0249434	0.00433711	0.0426582	0.00357761	0.0198734	0.0772885	0.000872751	0.00189207	0.00211193	0.0455496	0.0747702	0.0197335	0.11972	0.0162758	0.0131779	0	0.0058028	0	0	0.00202532
DG_074	Pre	0.195696	0.0106414	0.0554907	0.000320718	0.0150545	0	0.00956382	0.0144772	0.0199615	0.0236562	0.00704939	0.0716164	0.115767	0.0101924	0.0268826	0.0186915	0.00494548	0.0031238	0.0162091	0.0025016	0.0113727	0.0776267	0.00218089	0.0262604	0	0.01678	0.0437716	0.0111225	0.0124054	0.0063823	0.0281783	0.0043746	0.0112059	0.0815138	0.00422707	0.00211033	0.00162284	0.0272418	0.041533	0.0586915	0.172232	0.0299615	0.0193778	0	0	0	0	0.00204618
DG_032	Pre	0.134272	0.0221696	0.0524099	0.000574099	0.00868491	0	0.00263685	0.0133511	0.0128838	0.00779039	0.00585447	0.0918024	0.111702	0.00275701	0.0135514	0.00946595	0.00255007	0.00168224	0.00338451	0.00443925	0.0067757	0.0421762	0.00420561	0.0285113	0	0.0105274	0.02247	0.00955941	0	0.0113351	0.0158344	0.00568091	0.00786382	0.107096	0.000540721	0.000720961	0.00116822	0.0136248	0.0274299	0.0191722	0.258111	0.0185381	0.0321696	0.000821095	0.011976	0.000841121	0.00889186	0.00109479
DG_086	Pre	0.331812	0.0664225	0.134192	0.000327011	0.0171681	0	0.00543492	0.0176324	0.0146305	0.0223872	0.0089274	0.0761413	0.188025	0.00797253	0.0277436	0.0195095	0.00448005	0.00336821	0.00525834	0.000274689	0.00984303	0.0687377	0.00508175	0.0285742	0	0.00591236	0.0172858	0.00789405	0	0.010242	0.0112557	0.00457162	0.00497057	0.165415	0	0.00146501	0.00030085	0.00872466	0.0256377	0.00786789	0.229464	0.012361	0.0334598	0.00057554	0.0167953	0.000647482	0.00721387	0.00102681
DG_101	Pre	0.11497	0.0242234	0.0480568	0.000568407	0.0129346	0	0.00228024	0.0110972	0.0213748	0.0172769	0.00499009	0.105135	0.132783	0.00397885	0.019848	0.0165763	0.0034501	0.00722406	0.0212227	0.000363516	0.00642432	0.0694118	0.00230668	0.0456709	0	0.0373893	0.0725909	0.0255453	0.00553866	0.00297422	0.0547984	0.00658295	0.0359815	0.0511566	0.00032386	0.00163913	0.00230007	0.0482882	0.115215	0.00540648	0.0491276	0.0110905	0.00966292	0.000594845	0	0	0	0.00241904
DG_087	Pre	0.126567	0.0133067	0.0362475	0.000718563	0.025855	0	0.00226214	0.0105323	0.0479308	0.0156021	0.00437126	0.103506	0.163899	0.00433799	0.0514305	0.0248037	0.00429142	0.00457751	0.049002	0.00192282	0.0072322	0.0691617	0.00300732	0.0344311	0	0.0327611	0.0777578	0.0201065	0.0023819	0.00162342	0.0506454	0.0105988	0.02835	0.0529674	0.00089155	0.00301397	0.00680639	0.0517698	0.113739	0.00819694	0.021151	0.0125416	0.00657352	0	0.0155622	0	0	0.00145709
DG_094	Pre	0.160905	0.0141746	0.0450605	0.00056724	0.0138241	0	0.00908222	0.0222626	0.0206692	0.0295475	0.0117145	0.117693	0.172651	0.00791587	0.0297833	0.0189675	0.00463352	0.00315488	0.0153346	0.000191205	0.0118738	0.0974888	0.00334608	0.041912	0	0.0218292	0.0593881	0.0121989	0.0226705	0.00385596	0.0312683	0.00728489	0.0160867	0.0703378	0.000790312	0.00123008	0.002645	0.0317782	0.0588464	0.00985978	0.0880943	0.0176864	0.0105354	0.010427	0	0.00532823	0.000911409	0.0285532
DG_176	Pre	0.172381	0.0135037	0.0562408	0.000443847	0.0268662	0	0.00281775	0.0126026	0.0428312	0.0258373	0.00655683	0.0888702	0.208164	0.00496974	0.0526631	0.0275387	0.00432414	0.0032078	0.0671217	0.00120377	0.0066308	0.148958	0.00402824	0.0731876	0	0.00470746	0.014082	0.00726967	0	0.00786147	0.0111432	0.00523201	0.00505044	0.0967182	0.00338265	0.00388702	0.00133826	0.00780094	0.0265568	0.0551177	0.16039	0.0300403	0.0219099	0.00583726	0	0.00414257	0.000901143	0.0406792
DG_130	Pre	0.122113	0.015269	0.0309851	0.000596241	0.0242644	0	0.00334413	0.00686325	0.040162	0.0121452	0.00367466	0.0770577	0.144919	0.00359689	0.0455476	0.024932	0.00276734	0.00387557	0.0131821	0.000648088	0.00760207	0.0884381	0.0026442	0.0359819	0	0.0133506	0.0333441	0.0105962	0.0253662	0.00533377	0.0238626	0.00574854	0.0126183	0.0823072	0.00081011	0.00116008	0.00152949	0.0216397	0.0566235	0.0125794	0.107751	0.0144524	0.0174076	0.000382372	0.0124887	0	0.00160726	0.000991575
DG_001	Pre	0.249042	0.0189402	0.0788723	0.000686141	0.0191984	0	0.00843071	0.0166236	0.0266304	0.0275815	0.00911005	0.115605	0.200645	0.00636549	0.0340082	0.0227106	0.00483696	0.00403533	0.0803872	0.00243886	0.0107405	0.0863451	0.0110802	0.0511957	0	0.0301019	0.0752921	0.0175883	0.00169837	0.00116848	0.0454823	0.0106386	0.0253465	0.0423234	0.000427989	0.00451087	0.00202446	0.0391508	0.0848302	0.00689538	0.0350543	0.0147554	0.00707201	0.000407609	0.00618886	0	0.00408967	0.00235054
DG_205	Pre	0.134963	0.0417691	0.0403781	0.000330858	0.00666442	0	0.00435517	0.016266	0.012971	0.019291	0.00796759	0.0743754	0.14287	0.00688724	0.0135314	0.00980419	0.00572586	0.00285618	0.00930452	6.07698e-05	0.0100405	0.0421337	0.00222822	0.0178325	0	0.0072316	0.0189332	0.00744092	0	0.00710331	0.0123498	0.00265361	0.00582714	0.101425	0.000904794	0.000668467	0.000702228	0.0108103	0.0244092	0.0156921	0.191425	0.00943282	0.0242201	0	0	0	0	0.00142471
DG_135	Pre	0.100531	0.0193639	0.0261574	0.000406557	0.00630164	0	0.00575082	0.0141639	0.015423	0.0288393	0.00594098	0.0678164	0.0875738	0.00549508	0.0131279	0.0102885	0.00373115	0.00205246	0.00956721	0.000419672	0.00980984	0.0416852	0.00190164	0.022118	0	0.0173574	0.0440852	0.0125246	0.0156131	0.00338361	0.0269639	0.00272787	0.0133902	0.0581836	0.000354098	0.00109508	0.00167213	0.0315869	0.0589049	0.0114164	0.0908525	0.0141967	0.0129967	0	0	0	0	0.000872131
DG_151	Pre	0.156001	0.0384819	0.0617636	0.000833333	0.0216537	0	0.00653101	0.0195349	0.0427067	0.0228101	0.00866925	0.12741	0.251047	0.00574935	0.0446447	0.0271124	0.00514212	0.00583979	0.0134044	0.00319767	0.0103101	0.115155	0.0106718	0.0576615	0	0.0139599	0.0360336	0.0117119	0.00366279	0.00425065	0.0234044	0.00663437	0.0124548	0.0697416	0.000439276	0.000943152	0.00228036	0.0214858	0.0472222	0.00364987	0.118592	0.0249548	0.0143928	0.0374483	0.0325129	0.0188307	0.035155	0.104709
DG_223	Pre	0.135246	0.0149469	0.0493028	0.000405046	0.0139841	0	0.00203187	0.012583	0.0125299	0.00652722	0.00605578	0.0892165	0.118732	0.00297477	0.0189708	0.0166932	0.00325365	0.00458167	0.0165936	0.00529216	0.00683267	0.0327025	0.00412351	0.0165803	0	0.00368526	0.00958167	0.00677955	0	0.00987384	0.0072178	0.00293493	0.00334661	0.104382	0.00223772	0.00167331	0.000298805	0.00398406	0.0174037	0.0160159	0.190445	0.00673971	0.0287052	0.013838	0.00689243	0.00950863	0.00237716	0.0534595
DG_144	Pre	0.0843754	0.0029237	0.0183997	0.000317353	0.0124983	0	0.00613774	0.0147333	0.027684	0.0275895	0.00520594	0.0728629	0.0492573	0.00492235	0.023896	0.0156989	0.00433491	0.00268737	0.0673869	0.00114112	0.0127752	0.101884	0.0055233	0.0777178	0	0.0295341	0.0724983	0.0183052	0.00375422	0.00122215	0.0410533	0.00594193	0.0208373	0.0382782	0.00161377	0.00425388	0.00686698	0.0377785	0.0720392	0.00877785	0.0304727	0.0126131	0.00411884	0	0	0	0	0.00145847
DG_155	Pre	0.215992	0.0155992	0.0694826	0.000903733	0.0142829	0	0.00916176	0.0354813	0.0124754	0.0167387	0.015167	0.155403	0.19981	0.00379175	0.0134185	0.0102096	0.00324165	0.00176817	0.130845	0.00461035	0.00977734	0.0483235	0.00577603	0.0205697	0	0.0201965	0.0612901	0.0146103	0.0152456	0.00265226	0.031146	0.00570399	0.0137197	0.0446103	0.00300589	0.00716437	0.00474132	0.0340799	0.0558219	0.0113752	0.0603864	0.0103602	0.00932547	0.0155599	0.0059594	0.00535691	0.00113294	0.0467322
DG_105	Pre	0.164201	0.0153862	0.0334887	0.000366178	0.0117776	0	0.0105992	0.00669774	0.00655792	0.00792943	0.00581225	0.0826897	0.23285	0.00573901	0.0130759	0.00977364	0.00272304	0.00203728	0.0162983	5.99201e-05	0.00974035	0.0352929	0.00194407	0.0106658	0	0.0139814	0.0383688	0.0102064	0.0165313	0.00368842	0.0216644	0.00623169	0.0133888	0.0706724	0.00167776	0.00212383	0.000952064	0.0205593	0.0563782	0.00693076	0.0922037	0.00673768	0.0135553	0.0123369	0.0132357	0.00587883	0.00303595	0.0433688
DG_060	Pre	0.227517	0.0393265	0.082966	0.000231293	0.0146463	0	0.00115646	0.00451701	0.0275034	0.0112993	0.00667347	0.0892925	0.184415	0.00559864	0.0283605	0.0176939	0.00414286	0.00344898	0.00218367	2.72109e-05	0.00351701	0.0960952	0.00628571	0.0490612	0	0.00807483	0.0254898	0.00697279	0	0.00553741	0.0128231	0.00280952	0.00817007	0.116306	0	0.000578231	0.000646259	0.00952381	0.0254422	0.00241497	0.122435	0.0132857	0.0172925	0	0	0	0.000170068	0.00121088
DG_100	Pre	0.176285	0.0066755	0.0430596	0.000807947	0.0119868	0	0.00805298	0.00880795	0.00594702	0.00698013	0.00623179	0.0902119	0.192457	0.00396689	0.0165033	0.0108079	0.00203974	0.00323179	0.0308146	1.98675e-05	0.00853642	0.033245	0.00250993	0.0166887	0	0.00870199	0.019245	0.00715232	0	0.00494702	0.0127815	0.00962252	0.00684106	0.100695	0.000748344	0.00233113	0.000443709	0.0100795	0.0299139	0.012298	0.118775	0.00810596	0.0158212	0.00174834	0.0190662	0.000562914	0	0.00504636
DG_173	Pre	0.128897	0.10097	0.0524651	0.000297845	0.0125982	0	0.00335868	0.0135298	0.0290494	0.0202281	0.00562104	0.0602408	0.131445	0.0069455	0.0257605	0.0178454	0.00382129	0.00347275	0.026692	0.0494233	0.0093346	0.072294	0.00328897	0.0457414	0	0.0185488	0.0414068	0.0107605	0.00943599	0.00213561	0.02891	0.0031749	0.0132193	0.0440811	0.000513308	0.00153359	0.00365653	0.0314068	0.0529911	0.00547529	0.051071	0.00696451	0.00612801	0.0115526	0.0531115	0.0127567	0.0880798	0.0246198
DG_154	Pre	0.145745	0.0062953	0.0207987	0.000825503	0.0132081	0	0.00728188	0.00914094	0.0119866	0.0106107	0.00587919	0.139389	0.246463	0.00451007	0.0198523	0.0144295	0.00352349	0.00224161	0.0208456	0.00408054	0.00901342	0.0391946	0.0062349	0.0175906	0	0.00938926	0.0279396	0.00671141	0	0.004	0.0150671	0.00339597	0.00628859	0.0639933	0.00241611	0.00100671	0.000919463	0.014604	0.0255772	0.0234832	0.0997852	0.0121544	0.0136376	0.00681879	0.00922148	0.00356376	0.00818792	0.0212483
DG_041	Pre	0.155362	0.0282368	0.0845395	0.000546053	0.0256053	0	0.00758553	0.0169737	0.0553092	0.0264474	0.00660526	0.109592	0.130474	0.00654605	0.0505789	0.0291776	0.00427632	0.00473026	0.0245197	0.00184868	0.00933553	0.141855	0.004125	0.0722171	0	0.0132171	0.0358026	0.0109276	0.00109868	0.00182895	0.0237105	0.005125	0.0123816	0.0368158	0.00122368	0.00198684	0.00368421	0.0217763	0.05275	0.0181579	0.0508553	0.0239342	0.00503947	0.00581579	0	0.00350658	0	0.03875
DG_058	Pre	0.200355	0.0433531	0.062689	0.000558843	0.0352137	0	0.0119987	0.0188429	0.0546351	0.0146022	0.0152005	0.104839	0.213596	0.00618672	0.0717423	0.0404142	0.00389218	0.00722551	0.0105325	0.00632479	0.00897436	0.174464	0.00587114	0.099908	0	0.0034977	0.00954635	0.0042735	0	0.00473373	0.0121893	0.00675871	0.0029783	0.0830178	0.000368179	0.000959895	0.000519395	0.0057265	0.0152465	0.00788297	0.112794	0.0272321	0.00948718	0.00888231	0.01476	0.00491782	0.00458909	0.03119
DG_002	Pre	0.150144	0.0483727	0.0542848	0.000616798	0.0155512	0	0.0174409	0.015164	0.0236089	0.0371654	0.00683727	0.116201	0.16149	0.00698163	0.0257218	0.0159186	0.0038189	0.00356299	0.0115092	0.000557743	0.0134252	0.0937073	0.00377953	0.042126	0	0.0139829	0.0437073	0.00956693	0.00186352	0.00192257	0.0210696	0.00441601	0.00973097	0.0526706	0.000518373	0.000912073	0.000931759	0.0235433	0.040374	0.00797244	0.0522113	0.0121457	0.00595801	0.0028084	0	0.000787402	0.000262467	0.00661417
DG_007	Pre	0.15715	0.0217416	0.0529576	0.000962635	0.0089107	0	0.00563015	0.0101267	0.010285	0.00651045	0.00512983	0.122996	0.190849	0.00398987	0.00954402	0.00991134	0.00521849	0.00189994	0.00838505	0.00167194	0.00626346	0.0240152	0.00344522	0.010969	0	0.0123053	0.0342495	0.01114	0.000411653	0.00788474	0.0203483	0.00570614	0.010304	0.0351235	0.000614313	0.00121596	0.000924636	0.0244395	0.0450918	0.00829639	0.0592717	0.00946802	0.0078784	0.00781507	0.028879	0.00520583	0.0090057	0.0286447
DG_126	Pre	0.123547	0.0898584	0.0797977	0.000775455	0.0191099	0	0.00258935	0.0108361	0.0249899	0.0113216	0.00519218	0.110175	0.268746	0.00521241	0.0265543	0.0209508	0.00410654	0.00391773	0.00602158	0.0198651	0.00646662	0.0617937	0.00750506	0.0482333	0	0.010944	0.0267431	0.00693189	0	0.00323668	0.0207283	0.00418746	0.00630479	0.0345651	0.000883345	0.000606878	0.00211059	0.0163587	0.020526	0.01588	0.0738638	0.0133513	0.00900877	0.00198247	0.0106406	0.00113284	0.00461902	0.00674309
DG_197	Pre	0.0922141	0.0340383	0.0351884	0.000482485	0.00542631	0	0.00155321	0.012386	0.00869134	0.00495043	0.00555188	0.0857303	0.153748	0.00421679	0.00651685	0.00731659	0.00321216	0.00163252	0.0119564	0.000799736	0.00784534	0.0162062	0.0027495	0.00909451	0	0.0191077	0.0472703	0.010542	0.00144085	0.000693985	0.0272307	0.00673496	0.0122472	0.0160212	0.000297422	0.000879048	0.00425644	0.0275479	0.0480833	0.00540648	0.0126966	0.0038731	0.00272307	0.00158625	0	0.000693985	0	0.00487112
DG_127	Pre	0.215879	0.0415495	0.0715234	0.000820313	0.0333138	0	0.00628255	0.0185807	0.0613477	0.0261849	0.0141341	0.121608	0.301914	0.00550781	0.0653385	0.0369857	0.00610677	0.00654948	0.0169466	0.000338542	0.00966797	0.167246	0.00849609	0.0882487	0	0.00372396	0.0122266	0.00351563	0	0.00287109	0.0125911	0.00378906	0.00335937	0.0470898	0.00113281	0.0028776	0.000891927	0.00564453	0.0132617	0.00796875	0.0622266	0.0282292	0.00552083	0.00639323	0.0270898	0.00759766	0.0366146	0.0467839
DG_034	Pre	0.163801	0.0135872	0.041503	0.000768203	0.0157315	0	0.0102004	0.0188444	0.0273948	0.0323313	0.0139679	0.137455	0.180888	0.00647295	0.0329192	0.0213226	0.00535738	0.00386106	0.0137542	6.01202e-05	0.0117969	0.108818	0.00802271	0.0590314	0	0.00217769	0.00879092	0.00346025	0	0.00235137	0.0053173	0.00599198	0.00195725	0.0471677	0.000941884	0.00109552	0.000668003	0.00311957	0.010648	0.00762859	0.0775351	0.0185772	0.00863059	0.00927188	0.0061189	0.00555778	0.00172345	0.0323981
DG_129	Pre	0.193183	0.0141303	0.047045	0.000543989	0.0312424	0	0.0024043	0.0206985	0.0507388	0.0354735	0.00984553	0.0870987	0.103439	0.0097448	0.06	0.0413566	0.00558093	0.00877099	0.0112895	0.000389523	0.00821357	0.174359	0.00454668	0.111921	0	0.00280054	0.00803224	0.00341169	0	0.00345198	0.0112492	0.00337139	0.00196776	0.0502552	0.000779046	0.000879785	0.000745467	0.00505037	0.0112962	0.0119812	0.0553862	0.0215312	0.0074681	0	0	0	0	0.000597717
DG_082	Pre	0.1245	0.0149901	0.0514097	0.000893448	0.0144077	0	0.00644606	0.0108273	0.0161085	0.0126274	0.00606221	0.146161	0.219325	0.00714097	0.0210589	0.0211052	0.00340834	0.004818	0.0243018	0.000946393	0.00790867	0.0356585	0.00180013	0.0156254	0	0.00165453	0.00542687	0.00280609	0	0.00289212	0.00487095	0.00485771	0.00166777	0.0628789	0.000370615	0.00165453	0.000231635	0.00254798	0.0113435	0.00792852	0.0611383	0.00836532	0.00954335	0.00166777	0	0.0012773	0	0.00604236
DG_038	Pre	0.19415	0.0149402	0.0761753	0.000690571	0.014834	0	0.00249668	0.0133865	0.0362882	0.0277424	0.00687915	0.0933931	0.116892	0.00624834	0.0329416	0.0246348	0.00467463	0.00459495	0.00995352	0.000225764	0.00740372	0.101023	0.00497344	0.0712483	0	0.00632802	0.0140106	0.00481408	0	0.00197875	0.0120053	0.00442231	0.00416999	0.0434927	0.000212483	0.000922975	0.0011421	0.0100465	0.0186521	0.00326693	0.0345219	0.016826	0.00770916	0.00567729	0	0.00183931	0.000511288	0.0161753
DG_177	Pre	0.116936	0.0131322	0.0279932	0.000271186	0.0138712	0	0.00238644	0.0138102	0.0309153	0.0327593	0.00581695	0.0604678	0.0679864	0.00610169	0.0266847	0.0178847	0.00432542	0.00341017	0.0521966	0.000813559	0.010061	0.088	0.00225763	0.0579864	0	0.00291525	0.00793898	0.00305763	0	0.00200678	0.00585763	0.00652203	0.00234576	0.0478034	0.000576271	0.00287458	0.000671186	0.00496949	0.0125627	0.0027661	0.0508068	0.0103797	0.00773559	0	0.00451525	0	0.00224407	0.00059661
DG_097	Pre	0.184406	0.011376	0.0357494	0.000452196	0.0156137	0	0.0068863	0.0118152	0.0247997	0.0313824	0.0069832	0.0674612	0.18137	0.00589147	0.0258398	0.0146253	0.00469638	0.00260982	0.00910853	0.00257106	0.0109884	0.060478	0.00544574	0.0305103	0	0.0168605	0.0463501	0.0048708	0	0	0.0289212	0.00241602	0.0076938	0.00693798	0.000290698	0.000555556	0.000335917	0.0187339	0.014115	0.00114341	0.00375969	0.00614341	0.000917313	0	0	0	0	0.000671835
DG_030	Pre	0.164096	0.0123494	0.0598104	0.000507786	0.00907921	0	0.0024306	0.0152133	0.024719	0.012478	0.00767773	0.0922613	0.0992417	0.00488152	0.0218822	0.0173527	0.00356804	0.00249154	0.0053216	0.00136087	0.00717671	0.0533649	0.00459716	0.036283	0	0.00199729	0.00578199	0.0028436	0	0.00299932	0.00594448	0.00271496	0.00143534	0.0425592	0	0.000440081	0.000467163	0.00335139	0.00748138	0.00517942	0.0579485	0.00984428	0.00865944	0.0346242	0.00713609	0.00983751	0.00417739	0.0743196
DG_116	Pre	0.163702	0.0169784	0.0379791	0.000438195	0.013002	0	0.00565075	0.0241138	0.0249836	0.0193918	0.00938522	0.083414	0.0963179	0.00309353	0.0230935	0.0126161	0.00373447	0.00203401	0.0582995	0.000222368	0.0112623	0.0840942	0.0046828	0.0406082	0	0.00402878	0.0130739	0.00399608	0	0.000922171	0.00637018	0.00450621	0.0024722	0.0237868	0.00124918	0.00334205	0.000555919	0.00572269	0.0101373	0.00428385	0.0243689	0.0117855	0.0058208	0.0327011	0.0107587	0.0162001	0.00426422	0.0806344
DG_215	Pre	0.136611	0.0225184	0.0610516	0.000408573	0.00946417	0	0.0124514	0.0115405	0.00843938	0.0140255	0.00588747	0.086919	0.167924	0.00326189	0.0146216	0.0101407	0.00206966	0.00156731	0.00437374	4.68855e-05	0.011574	0.063704	0.0041795	0.0294776	0	0.00497656	0.0158205	0.00293369	0	0.00107167	0.00809109	0.0025653	0.00223711	0.0286537	0.00131949	0.00109176	0.000529136	0.00662425	0.00865372	0.0041795	0.0229471	0.0051641	0.00288011	0	0	0	0	0.00170127
DG_222	Pre	0.187442	0.0312161	0.0577462	0.000581626	0.016312	0	0.0133443	0.00948447	0.00831461	0.0174025	0.00596167	0.111553	0.187872	0.00765367	0.017885	0.0124719	0.00456048	0.00249835	0.010152	0.00126239	0.0114937	0.0314673	0.00662921	0.0144085	0	0.0097885	0.030694	0.00461335	0	0	0.0156114	0.00200264	0.00573034	0.00376735	0	0.000469266	0.000846001	0.0125182	0.0172637	0	0.000793126	0.00222075	0.00064772	0.00198942	0	0.00106411	0.00010575	0.00998017
DG_089	Pre	0.223259	0.0259686	0.1132	0.000615183	0.0298757	0	0.00579843	0.0155236	0.0415249	0.029051	0.00947644	0.105229	0.164993	0.0117932	0.0492016	0.0320157	0.00795812	0.00539267	0.0130759	0.000418848	0.00757199	0.0680628	0.00877618	0.0344503	0	0.00592932	0.014555	0.00289267	0	0.000890052	0.0141361	0.00236911	0.00236911	0.0091034	0	0.00126963	0.000346859	0.00812827	0.00560209	0.00263089	0.0151374	0.0151898	0.00240838	0.0129385	0.0135079	0.00781414	0.00159031	0.0678076
DG_106	Pre	0.197201	0.0222107	0.0515061	0.000381383	0.0174855	0	0.0112993	0.00784098	0.0236005	0.0124628	0.00447964	0.0738526	0.215676	0.00330317	0.0256238	0.0134195	0.00297996	0.00241112	0.00787977	0.00162896	0.0108403	0.0560375	0.00451196	0.0307046	0	0.00234001	0.00910795	0.00248222	0	0.00095669	0.00566257	0.00341952	0.00148675	0.0261151	0.000872657	0.00081448	0.000426632	0.00376858	0.00700065	0.00531351	0.0225081	0.00632838	0.00336781	0.00316096	0	0.00117647	0	0.00780866
DG_081	Pre	0.261011	0.0108902	0.0661714	0.000455154	0.0097925	0	0.00565596	0.0122289	0.00845382	0.0175435	0.0069411	0.0792905	0.142517	0.00688086	0.0164123	0.0110375	0.00406961	0.00395582	0.0222356	7.36278e-05	0.0104217	0.0326908	0.00425703	0.0142236	0	0.0057095	0.0175636	0.00283802	0	0.000689424	0.0104618	0.00286479	0.00321285	0.0115997	0	0.00118474	0.00038822	0.00720884	0.0101807	0.002751	0.0145984	0.00278447	0.00339357	0	0	0	0	0.000742972
DG_181	Pre	0.24936	0.00950033	0.07004	0.000493005	0.00941372	0	0.0108728	0.0152965	0.00745503	0.0269154	0.00714191	0.0991672	0.137695	0.00728847	0.0148901	0.0106929	0.00431046	0.00209194	0.017535	0.000146569	0.0123784	0.0206995	0.00617588	0.0103398	0	0.00786143	0.0275483	0.00325783	0	0.000346436	0.0116922	0.00240506	0.00418388	0.00597602	0	0.000952698	0.00077948	0.0100799	0.0123651	0	0.00171219	0.00191872	0.000892738	0	0	0	5.996e-05	0.000726183
DG_013	Pre	0.217337	0.0048558	0.0708451	0.000690812	0.013662	0	0.00484909	0.016385	0.0199396	0.0157679	0.00706908	0.126398	0.13063	0.00697518	0.0229645	0.0176928	0.00580148	0.00217304	0.00560698	0.00125419	0.00963783	0.0292689	0.0054393	0.0121194	0	0.00762575	0.0201476	0.00400402	0	0	0.0131053	0.00152918	0.00445339	0.00297787	0	0	0.000402414	0.0114286	0.0165392	0.00118042	0	0.00386318	0.000435949	0	0	0	0	0.000778001
DG_225	Pre	0.066958	0.00132088	0.0117545	0.000466978	0.00334223	0	0.00386925	0.00468312	0.00243496	0.00212809	0.00358239	0.0732355	0.124777	0.00224817	0.00426951	0.00509673	0.00191461	0.000440294	0.00314877	0.00114743	0.00919947	0.00384923	0.00298866	0.00191461	0	0.0081054	0.0245163	0.00256838	0.00252168	0	0.0128886	0.00141428	0.0039026	0.00292862	0	0	0.00178786	0.0115744	0.00943296	0.000386925	0	0.00116744	0.000406938	0.00871915	0	0.00387592	0.00054036	0.038052
Deckrot	Pre	0.138616	0.025746	0.0576747	0.000947581	0.0235081	0	0.00547715	0.0104167	0.0212366	0.0232325	0.00521505	0.129597	0.259704	0.00586022	0.0261022	0.0217204	0.00276882	0.00295699	0.00833333	0.000436828	0.00610887	0.0457392	0.00491935	0.0244019	0	0.00532258	0.0146035	0.00339382	0	0.000551075	0.0107191	0.00323253	0.0030578	0.00967742	0.000221774	0	0.000241935	0.0052621	0.00848118	0.00283602	0.00817876	0.00444892	0.00290995	0.00652554	0.00077957	0.00313844	0	0.0339919
DG_062	Pre	0.0561227	0.00582898	0.0123433	0.000306789	0.0108616	0	0.00266971	0.00543734	0.0184073	0.00635117	0.0027154	0.0599413	0.0721084	0.00289817	0.0179373	0.010705	0.00431462	0.00199739	0.0206397	0.00407311	0.00740862	0.0388316	0.00131201	0.0209399	0	0.00093342	0.00372715	0.00148825	0	0.00116188	0.00280026	0.0086423	0.000926893	0.024876	0.000620104	0.00105091	0.000241514	0.00191253	0.00511097	0.00216057	0.0187533	0.00490209	0.00362272	0.00017624	0.00237598	0	0.00110313	0.00100522
DG_104	Pre	0.164357	0.0260269	0.0339603	0.000358285	0.0126488	0	0.0210109	0.00639155	0.0128855	0.014984	0.00198976	0.0754255	0.13	0.00337812	0.0138132	0.00783749	0.00221369	0.000729367	0.00392834	0.000115163	0.0127319	0.023199	0.00397313	0.0117914	0	0.00641075	0.0236084	0.0021817	0.0119578	0	0.0102303	0.0012604	0.0031286	0.00252719	0	0.000319898	0.000422265	0.00866283	0.00868842	0	0.000620601	0.00241843	0.000287908	0	0	0	0	0.000658989
DG_157	Pre	0.116676	0.00200133	0.0187899	0.00109043	0.012613	0	0.0186303	0.00983378	0.013617	0.0156449	0.00608378	0.169827	0.228271	0.00311835	0.0182912	0.0118285	0.00259973	0.00194149	0.00442154	0.000279255	0.0111769	0.0543019	0.00347739	0.0242553	0	0.00117021	0.00520612	0.00152261	0	0.000817819	0.0031383	0.00287899	0.000744681	0.0243351	0.00025266	0.000445479	0.000179521	0.00164894	0.00527261	0.00228723	0.0192753	0.00712766	0.00475399	0	0	0	0	0.000924202
DG_063	Pre	0.110505	0.0628167	0.0508086	0.000431267	0.00834232	0	0.00727089	0.0121496	0.0106267	0.0107951	0.00541779	0.0862197	0.233457	0.00608491	0.0119003	0.00937332	0.00401617	0.00178571	0.0334636	0.000721024	0.0090903	0.0243396	0.00463612	0.0146226	0	0.00270216	0.00811995	0.00244609	0.00887466	0.000404313	0.00556604	0.0027965	0.00244609	0.0107884	0.000336927	0.00175202	0.000256065	0.0036186	0.00915768	0.00489218	0.00830863	0.00484501	0.00161725	0	0	0	0	0.000532345
DG_183	Pre	0.160296	0.0282369	0.058607	0.000921938	0.0316083	0	0.00577389	0.0137618	0.0312113	0.0389569	0.0111171	0.107766	0.197295	0.00735532	0.0414468	0.0347443	0.00597577	0.00619785	0.0078533	0.00013459	0.00679677	0.060498	0.0105787	0.0411373	0	0.00408479	0.0119987	0.00264468	0.00323688	0.000222073	0.0121803	0.00579408	0.00195155	0.00467699	0	0	0.000316285	0.00591521	0.00615074	0	0.00199192	0.00495289	0.00130552	0.00393674	0	0.00250336	0.000174966	0.0214266
DG_023	Pre	0.117361	0.00833333	0.0455058	0.000635538	0.0118353	0	0.00169909	0.0161933	0.0135668	0.0131453	0.0061738	0.115564	0.0909663	0.00712062	0.0153632	0.0135084	0.00574578	0.00208171	0.00874838	0.00075227	0.00728275	0.0135603	0.00410506	0.00690661	0	0.00555772	0.0142802	0.00258106	0	0	0.010227	0.00177691	0.00219196	0.00505837	0	0	0.000233463	0.00671206	0.00455253	0.000927367	0.00371595	0.00242542	0.00157588	0.00442931	0	0.00199741	0	0.0179637
DG_179	Pre	0.238613	0.0169669	0.0678224	0.000505509	0.0244264	0	0.00604666	0.00801685	0.021199	0.0213351	0.00363577	0.0942385	0.118639	0.00745301	0.0285483	0.0207971	0.00476993	0.00382372	0.00740117	0.000486066	0.00913804	0.0276993	0.00254051	0.0133182	0	0.00324692	0.0117434	0.00145172	0.0117952	0.000181465	0.00794556	0.00165262	0.00185353	0.00353208	0	0.000609203	0.000447181	0.00453662	0.00569669	0	0.00259883	0.00184705	0.00103694	0	0.00428386	0	0	0.000421257
DG_085	Pre	0.095306	0.00861466	0.0185676	0.000450572	0.00713517	0	0.00279085	0.00735037	0.0107599	0.00958978	0.00332213	0.0869805	0.128231	0.0028043	0.0110693	0.00852724	0.00328178	0.00118359	0.00546066	0.00183591	0.0064156	0.0156288	0.00212508	0.00827841	0	0.00274378	0.00735709	0.00221923	0.0123739	0.000316073	0.00534633	0.0034499	0.00213181	0.00554136	0	0.000295898	0.000295898	0.00349697	0.00717552	0.00070612	0.00300605	0.00188299	0.00111634	0	0	0	0	0.000578346
DG_047	Pre	0.102342	0.0136945	0.0216622	0.000296097	0.0234657	0	0.00487887	0.0223553	0.0433311	0.0308479	0.00932705	0.0740983	0.110619	0.00740915	0.0447914	0.0266218	0.00527591	0.00314266	0.00757739	0.000847914	0.0105518	0.08714	0.00661507	0.0564939	0	0.00174293	0.00643338	0.00164199	0.015821	0	0.00729475	0.0024428	0.000948856	0.00399731	0	0	0.000269179	0.00315612	0.00335128	0.000847914	0.00169583	0.00748318	0.000625841	0	0	0	0	0.00129206
DG_068	Pre	0.107035	0.00716855	0.0291206	0.000446369	0.00819454	0	0.00685543	0.00557628	0.00582945	0.0075483	0.00341772	0.092485	0.12529	0.00485676	0.0098934	0.00778814	0.00259161	0.00161226	0.00403065	0.000346436	0.00932712	0.0136842	0.00207861	0.00663558	0	0.00536975	0.0154164	0.00233178	0.00163891	0	0.00858095	0.00139907	0.00231845	0.00213857	0	0	0.000286476	0.00661559	0.0056962	0	0.000619587	0.00152565	0.00035976	0.00316456	0	0.00188541	0	0.0100067
DG_046	Pre	0.177043	0.0104637	0.0543683	0.000517473	0.0252755	0	0.00813172	0.0144422	0.0391532	0.0266935	0.0118683	0.0861223	0.125706	0.00860215	0.0421035	0.0224395	0.00586022	0.00346774	0.0175	0.000456989	0.0111895	0.0584745	0.0022043	0.0269624	0	0.00234543	0.00696237	0.00248656	0.000215054	0.000349462	0.00686828	0.00265457	0.00170699	0.00637097	0.000201613	0.000759409	0.000268817	0.00383737	0.00711022	0.000799731	0	0.00589382	0.000483871	0	0	0	0	0.00132392
DG_149	Pre	0.183033	0.085037	0.11655	0.00066577	0.0214122	0	0.00321453	0.0125488	0.0261264	0.0332549	0.00618023	0.123557	0.244015	0.00854069	0.0260323	0.0244519	0.00748487	0.00487559	0.00797579	0.00926698	0.00605245	0.0420511	0.0107532	0.0336584	0	0.00235373	0.00659718	0.00163416	0	0.000255548	0.00689307	0.00395427	0.00111634	0.003692	0	0	0.000208473	0.00416274	0.00436449	0.000914593	0.00287155	0.00503699	0.00139206	0.000410222	0.00118359	0	0.00134499	0.00295898
DG_184	Pre	0.189133	0.00838188	0.0557411	0.00028479	0.00994822	0	0.00310032	0.0101683	0.0116764	0.0170032	0.00485437	0.0607832	0.103534	0.00376052	0.01389	0.00958576	0.00266667	0.00179288	0.00398706	0.000834951	0.00869903	0.028945	0.00450485	0.0183366	0	0.00380583	0.0126019	0.00139806	0	0	0.0071068	0.00128803	0.00201942	0.00299676	0	0	0.000446602	0.0053657	0.0051068	0	0	0.00198058	0.000401294	0	0	0	0	0.000323625
DG_166	Pre	0.136281	0.0303706	0.0262541	0.000761085	0.0224156	0	0.0168034	0.0117803	0.0273197	0.0378094	0.00690271	0.130073	0.168206	0.00848445	0.0308008	0.0207743	0.00459298	0.00442091	0.00954335	0.0015685	0.0133488	0.040503	0.00436797	0.0181469	0	0.00179351	0.00782925	0.00122435	0.00266049	0.000244871	0.00542025	0.00191264	0.00107876	0.00548643	0	0.000456651	0.000463269	0.00281932	0.00476506	0	0.00260093	0.00373925	0.00112508	0.00627399	0.00740569	0.00269358	0.00121112	0.0203441
DG_110	Pre	0.193814	0.0114548	0.0614004	0.000625425	0.0104895	0	0.00777022	0.00883073	0.00411285	0.00627464	0.00455472	0.107648	0.230884	0.00692046	0.0117607	0.00909585	0.00367777	0.00297757	0.0106118	0.000870156	0.00938817	0.00855201	0.00337186	0.00386132	0	0.00247451	0.00726717	0.00186948	0	0.000183549	0.00488103	0.00299796	0.00140721	0.00564242	0	0.000441876	0.000271924	0.00399728	0.00583277	0	0.0028552	0.00157036	0.000904147	0.00520734	0	0.00253569	0	0.018586
DG_168	Pre	0.048218	0.000411227	0.00814621	0.000293734	0.0126828	0	0.00278068	0.0062141	0.0153721	0.0105875	0.00328982	0.0585509	0.12391	0.00287206	0.0183877	0.0123433	0.00233029	0.0018799	0.00374021	0.000137076	0.0071671	0.0272585	0.00201044	0.0163642	0	0.00310052	0.00941906	0.00138381	0.000652742	0.000150131	0.00661227	0.00289164	0.00140992	0.00307441	0	0	0.000248042	0.00424935	0.00338773	0.000789817	0.0013577	0.00265013	0.000946475	0	0	0	0	0.000913838
DG_214	Pre	0.124803	0.00965886	0.0292642	0.000140468	0.00424749	0	0.00309699	0.00675585	0.00403344	0.00638796	0.00279599	0.0376522	0.0366555	0.00550502	0.00522408	0.00534448	0.00262207	0.000829431	0.00706355	0.000341137	0.0130836	0.00492308	0.00206689	0.00245485	0	0.0031505	0.0110903	0.00168562	0	0.000200669	0.00507692	0.00143813	0.00194649	0.00281605	0	0.000648829	0.000481605	0.00433445	0.00718395	0	0.000849498	0.000856187	0.000508361	0.00332441	0	0.0012709	0	0.0118662
DG_114	Pre	0.162646	0.0145803	0.0702351	0.000537273	0.00284755	0	0.00525856	0.00838818	0.00483546	0.00345198	0.00503022	0.10818	0.130766	0.0031632	0.00467428	0.00534587	0.00504365	0.00108798	0.00340497	0.000973808	0.00758227	0.00486904	0.0123371	0.0041773	0	0.00340497	0.00973136	0.00173942	0	0.000114171	0.00591001	0.00136333	0.00155138	0.00293486	0	0	0.000194762	0.00331095	0.00347884	0.00123573	0.00229013	0.00124916	0.000671592	0.00158496	0.0182539	0.00178643	0.0122297	0.0016857
DG_055	Pre	0.169432	0.0147525	0.0520264	0.000244224	0.0187657	0	0.0104554	0.0114323	0.0210429	0.024099	0.00448845	0.06033	0.104812	0.00393399	0.0263498	0.0151221	0.00293729	0.00242244	0.00390099	3.9604e-05	0.0109373	0.0616436	0.00458086	0.0405743	0	0.00145215	0.00527393	0.00130033	0.00271947	9.24092e-05	0.00456766	0.00180858	0.000772277	0.00438284	0	0	0.00019802	0.00208581	0.00282508	0	0.00192739	0.00525413	0.00049505	0	0	0	0	0.00120132
DG_098	Pre	0.221378	0.019295	0.0918435	0.000646831	0.027458	0	0.00175938	0.00739327	0.0216753	0.0129948	0.00453428	0.128396	0.186113	0.00872574	0.0300582	0.0163648	0.00840233	0.0057762	0.0101358	0.00160414	0.00805951	0.0362031	0.00406856	0.0204787	0	0.00150712	0.00723803	0.00175291	0	0.00038163	0.00482536	0.00225744	0.00161061	0.00449547	0	0	0.000329884	0.00184994	0.00465071	0	0	0.00113842	0.000860285	0.00102846	0	0	0	0.00633894
DG_201	Pre	0.0820737	0.0213759	0.0308822	0.000414747	0.00726136	0	0.00653061	0.00951942	0.00751152	0.00571429	0.00393022	0.0789401	0.0765109	0.00595128	0.00836076	0.00800527	0.00366689	0.00257406	0.010711	0.00100724	0.00901909	0.0109348	0.00363397	0.00450955	0	0.00119816	0.00440421	0.000895326	0	0.000348914	0.00262673	0.0016524	0.000566162	0.00697828	0	0	0.000171165	0.00148782	0.00268598	0	0.00659645	0.00175774	0.00135616	0.00234365	0.0164582	0.00298881	0.0152469	0.00186965
DG_111	Pre	0.174418	0.00373203	0.0434902	0.000346405	0.00569281	0	0.00515686	0.00526797	0.00373203	0.00937908	0.0042549	0.064085	0.159458	0.00540523	0.00811111	0.00662745	0.00286275	0.00118954	0.00445752	0.000189542	0.0104575	0.0103464	0.00305229	0.0038366	0	0.00130065	0.00489542	0.00128758	0	0.000281046	0.00290196	0.00154248	0.00072549	0.00557516	0	0	0.000150327	0.00166667	0.00296732	0	0.00207843	0.0022549	0.000771242	0.00448366	0	0.00241176	0	0.0189673
DG_091	Pre	0.148919	0.0315896	0.0627557	0.000390879	0.0174853	0	0.00434528	0.00523779	0.00593485	0.00527036	0.00366124	0.0838371	0.153661	0.00447557	0.0126775	0.00841694	0.00234528	0.000729642	0.00331596	0.00114658	0.00873616	0.00865798	0.00357003	0.00478176	0	0.0017785	0.00605863	0.00121173	0	0.000188925	0.00407818	0.00149837	0.000788274	0.0036873	0	0	0.000175896	0.00250163	0.00201954	0	0.00233876	0.00116612	0.0007557	0	0.006	0	0	0.000990228
DG_146	Pre	0.162867	0.00880051	0.0620654	0.000436177	0.0172162	0	0.0099102	0.00628608	0.0149647	0.0123028	0.00345734	0.0754843	0.0955677	0.0069211	0.0224375	0.0174535	0.00550994	0.00198845	0.00611931	0.000179602	0.00838999	0.0232328	0.0021424	0.00944836	0	0.00105196	0.00360487	0.0012508	0	0.000218089	0.00399615	0.00337396	0.000635022	0.00372033	0	0	0.000211674	0.00186658	0.00244387	0	0.00145606	0.001873	0.000628608	0.00578576	0	0.00456062	0.000782553	0.0337973
DG_028	Pre	0.142307	0.0121328	0.0321596	0.000469484	0.012951	0	0.00591549	0.00881288	0.0226559	0.0178404	0.00397049	0.0880215	0.0947619	0.00422535	0.0219987	0.0128303	0.00401744	0.00354795	0.00614353	0.000905433	0.0110597	0.0308249	0.00352783	0.014554	0	0.000348759	0.00208585	0.00111335	0	0.000268276	0.00121395	0.00222669	0.000362173	0.00357478	0	0	0.000127431	0.000630449	0.00187793	0	0.00187793	0.0035949	0.000516432	0.00169014	0.0179343	0.00221999	0.0280684	0.00191818
DG_141	Pre	0.122954	0.0235294	0.0503371	0.000489095	0.0115003	0	0.00350297	0.0119828	0.00890945	0.00948447	0.00627892	0.105823	0.150972	0.00398546	0.00967614	0.00994052	0.00387971	0.00148711	0.00445473	0.00282221	0.00797753	0.0108592	0.00836748	0.00740912	0	0.000852611	0.00285525	0.00120952	0	0.0002115	0.00270324	0.00145406	0.000693985	0.00238599	0	0.000270985	0.000244547	0.00135492	0.00228685	0	0.00111038	0.00145406	0.000442829	0.0131989	0	0.00585592	0.00107072	0.0455321
DG_052	Pre	0.0845129	0.00658322	0.0233153	0.000358593	0.00366035	0	0.00834912	0.00660352	0.00421516	0.00526387	0.00231394	0.0798647	0.0703721	0.00233424	0.00414073	0.00353857	0.00277402	0.00102842	0.00493911	0.00014885	0.0127605	0.00745602	0.00399188	0.00451286	0	0.000629229	0.00317321	0.00214479	0	0.000128552	0.00117727	0.00266576	0.000189445	0.00233424	0	0	5.41272e-05	0.000805142	0.00135995	0	0	0.000859269	0.000257104	0	0.000520974	0	0	0.000250338
[truncated: 20 more columns]

## Sheet: S4
Table S4: All significant QTLs identified in this study
Compounds	Compound class	Developmental stage	LG	LOD	% Variance explained	Left flanking marker	Right flanking marker	12Xv2 start position (bp)	12Xv2 stop position (bp)	Number of genes in v2
1,8-Cineole	Monoterpene	post-veraison 2019	chr01	9.3	62	1_6994761	1_12552777	6994761	12945793	512
1,8-Cineole	Monoterpene	post-veraison 2019	chr01	4.5	22.8	1_4037365	1_4328972	4037365	4328972	39
1,8-Cineole	Monoterpene	pre-veraison 2019	chr01	3.41	17.8	1_4037365	1_4328972	4037365	4328972	39
Ketones total	Ketone	harvest ripe 2022	chr02	3.14	17.5	Un_12135833	2_5788962	4713670	5900961	134
Alpha-Ylangene	Sesquiterpene	pre-veraison 2019	chr02	2.97	15.7	Un_15559145	2_5418217	5535358	16122450	665
Hexanal	Aldehyde	post-veraison 2019	chr02	3.77	19.5	2_8438220	2_8569987	8550219	8681986	8
1-Octen-3-one	Ketone	harvest ripe 2022	chr02	4.48	24	2_8943456	2_14822863	9055455	14934862	332
Pentanal	Aldehyde	harvest ripe 2022	chr02	5.54	28.8	2_8943456	2_14822863	9055455	14934862	332
(E)-2-Heptenal	Aldehyde	harvest ripe 2022	chr02	4.53	24.3	2_8974123	2_14942522	9086122	15054521	335
(Z)-2-Octen-1-ol	Alcohol	harvest ripe 2022	chr02	5.24	27.5	2_8974123	2_14942522	9086122	15054521	335
1-Octen-3-ol	Alcohol	harvest ripe 2022	chr02	4	21.8	2_8974123	2_14942522	9086122	15054521	335
2-Octenal	Aldehyde	harvest ripe 2022	chr02	5.1	26.9	2_8974123	2_14942522	9086122	15054521	335
Aldehydes total	Aldehyde	post-veraison 2019	chr02	5.7	28	2_8974123	2_14942522	9086122	15054521	335
Beta-Ionone	C13-norisoprenoid	harvest ripe 2022	chr02	4.47	24	2_8974123	2_14942522	9086122	15054521	335
C13-norisoprenoids total	C13-norisoprenoid	harvest ripe 2022	chr02	2.64	15	2_8974123	2_14942522	9086122	15054521	335
Ketones total	Ketone	harvest ripe 2022	chr02	4.14	22.4	2_8974123	2_14942522	9086122	15054521	335
trans-2-Hexenal	Aldehyde	post-veraison 2019	chr02	4.57	23.1	2_8974123	2_14942522	9086122	15054521	335
3-Hexanol	Alcohol	post-veraison 2019	chr02	4.12	21.1	2_9136972	2_13397782	9248971	13509781	220
Aldehydes total	Aldehyde	harvest ripe 2022	chr02	3.7	20.3	2_9136972	2_14942522	9248971	15054521	325
Pentanal	Aldehyde	harvest ripe 2022	chr02	4.06	22.1	2_9136972	2_13397782	9248971	13509781	220
trans-2-Hexenal	Aldehyde	harvest ripe 2022	chr02	4.05	22	2_9136972	2_14942522	9248971	15054521	325
Trans-2-pentenal	Aldehyde	harvest ripe 2022	chr02	3.22	17.9	2_9136972	2_14942522	9248971	15054521	325
C13-norisoprenoids total	C13-norisoprenoid	harvest ripe 2022	chr02	3.28	18.3	2_9143505	2_13397782	9255504	13509781	219
Beta-Ionone	C13-norisoprenoid	harvest ripe 2022	chr02	4.38	19.7	2_14320386	2_16280570	14432385	16392569	147
3-Hexanol	Alcohol	harvest ripe 2021	chr04	4.3	23.5	4_3579466	4_14330886	3579466	14477136	743
(E)-2-Heptenal	Aldehyde	post-veraison 2019	chr05	3.95	20.3	5_1797557	5_1598931	114807	313433	25
(E)-2-Octenal	Aldehyde	post-veraison 2019	chr05	3.66	19	5_1797557	5_1598931	114807	313433	25
1-Octen-3-one	Ketone	post-veraison 2019	chr05	2.93	15.5	5_1797557	5_1598931	114807	313433	25
(E)-2-Decenal	Aldehyde	post-veraison 2019	chr05	4.51	22.9	5_1598931	5_1387571	313433	524793	36
Geranyl acetone	C13-norisoprenoid	pre-veraison 2019	chr05	3.72	19.3	5_1000961	5_474400	911403	1437964	69
Geranyl acetone	C13-norisoprenoid	harvest ripe 2021	chr05	2.95	16.8	5_857035	5_2217503	1055329	2217503	99
C13-norisoprenoids total	C13-norisoprenoid	pre-veraison 2019	chr05	4.08	20.4	5_474400	5_2823899	1437964	2823899	100
Alpha-Ylangene	Sesquiterpene	harvest ripe 2022	chr05	2.4	13.7	5_2177261	5_8410222	2177261	8410222	660
(E)-Citral	Monoterpene	post-veraison 2019	chr05	12.37	50.9	5_2217503	5_2823899	2217503	2823899	53
(E)-Citral	Monoterpene	harvest ripe 2021	chr05	4.06	22.3	5_2217503	5_2823899	2217503	2823899	53
Beta-Citronellol/Nerol	Monoterpene	harvest ripe 2022	chr05	6.24	31.8	5_2217503	5_2823899	2217503	2823899	53
Beta-Citronellol/Nerol	Monoterpene	post-veraison 2019	chr05	5.8	28.4	5_2217503	5_4058168	2217503	4058168	214
cis-Rose oxide	Monoterpene	harvest ripe 2022	chr05	7.47	36.7	5_2217503	5_2823899	2217503	2823899	53
cis-Rose oxide	Monoterpene	harvest ripe 2021	chr05	2.78	15.9	5_2217503	5_2823899	2217503	2823899	53
cis-Rose oxide	Monoterpene	post-veraison 2019	chr05	2.73	14.6	5_2217503	5_2823899	2217503	2823899	53
Geraniol	Monoterpene	harvest ripe 2022	chr05	6.01	30.8	5_2217503	5_2823899	2217503	2823899	53
Limonene	Monoterpene	harvest ripe 2022	chr05	7.43	36.6	5_2217503	5_2823899	2217503	2823899	53
Linalool	Monoterpene	harvest ripe 2022	chr05	3.66	20.1	5_2217503	5_2823899	2217503	2823899	53
Monoterpenes total	Monoterpene	harvest ripe 2022	chr05	8.39	40.3	5_2217503	5_2823899	2217503	2823899	53
Nerol oxide	Monoterpene	post-veraison 2019	chr05	4.19	21.4	5_2217503	5_2823899	2217503	2823899	53
p-mentha-1,5-dien-8-ol	Monoterpene	harvest ripe 2021	chr05	5.74	26.7	5_2217503	5_2823899	2217503	2823899	53
p-mentha-1,5-dien-8-ol	Monoterpene	post-veraison 2019	chr05	4.9	20.1	5_2217503	5_2823899	2217503	2823899	48
trans-β-Ocimene	Monoterpene	harvest ripe 2022	chr05	6.49	32.9	5_2217503	5_2823899	2217503	2823899	53
α-terpinene	Monoterpene	harvest ripe 2022	chr05	4.39	23.6	5_2217503	5_2823899	2217503	2823899	53
α-Terpineol	Monoterpene	harvest ripe 2022	chr05	3.88	21.2	5_2217503	5_2823899	2217503	2823899	53
α-terpinolene	Monoterpene	harvest ripe 2022	chr05	5.15	27.1	5_2217503	5_2823899	2217503	2823899	53
β-Myrcene	Monoterpene	harvest ripe 2022	chr05	7.32	36.2	5_2217503	5_2823899	2217503	2823899	53
γ-Terpinene	Monoterpene	harvest ripe 2022	chr05	3.55	19.6	5_2217503	5_2823899	2217503	2823899	53
p-Cymene	Monoterpene	harvest ripe 2022	chr05	3.36	18.7	5_2488138	5_2823899	2488138	2823899	59
6-Methyl-5-hepten-2-one	C13-norisoprenoid	harvest ripe 2021	chr05	5.06	27	5_2898965	5_4373666	2823899	4373666	161
6-Methyl-5-hepten-2-one	C13-norisoprenoid	post-veraison 2019	chr05	5.44	26.9	5_2898965	5_4373666	2823899	4373666	161
6-Methyl-5-hepten-2-one	C13-norisoprenoid	pre-veraison 2019	chr05	4.89	24.5	5_2823899	5_4301838	2823899	4301838	161
cis-Rose oxide	Monoterpene	pre-veraison 2019	chr05	6.97	33	5_2823899	5_4301838	2823899	4301838	161
Linalool	Monoterpene	pre-veraison 2019	chr05	14.59	45.2	5_2898965	5_4373666	2823899	4301838	161
p-Cymene	Monoterpene	post-veraison 2019	chr05	7.58	27.5	5_2823899	5_4301838	2823899	4301838	161
p-Cymene	Monoterpene	pre-veraison 2019	chr05	7.14	24	5_2823899	5_4301838	2823899	4301838	161
Pentenal	Aldehyde	post-veraison 2019	chr05	3.82	19.7	5_2823899	5_4301838	2823899	4301838	168
p-mentha-1,5-dien-8-ol	Monoterpene	pre-veraison 2019	chr05	4.74	16.2	5_2823899	5_4301838	2823899	4301838	161
trans-β-Ocimene	Monoterpene	post-veraison 2019	chr05	8.06	37.1	5_2898965	5_4373666	2823899	4301838	161
trans-β-Ocimene	Monoterpene	pre-veraison 2019	chr05	6.98	33.1	5_2898965	5_4373666	2823899	4301838	161
α-terpinene	Monoterpene	pre-veraison 2019	chr05	6.6	24	5_2823899	5_4301838	2823899	4301838	161
γ-Terpinene	Monoterpene	post-veraison 2019	chr05	7.18	27.1	5_2898965	5_4373666	2823899	4301838	161
γ-Terpinene	Monoterpene	pre-veraison 2019	chr05	7.13	25.2	5_2823899	5_4301838	2823899	4301838	161
(E)-Citral	Monoterpene	pre-veraison 2019	chr05	8.78	39.7	5_2898965	5_4373666	2898965	4373666	164
1-Penten-3-one	Ketone	post-veraison 2019	chr05	2.88	15.3	5_2898965	5_4373666	2898965	4373666	161
Beta-Citronellol/Nerol	Monoterpene	harvest ripe 2021	chr05	9.44	42.8	5_2898965	5_4373666	2898965	4373666	168
Beta-Citronellol/Nerol	Monoterpene	pre-veraison 2019	chr05	4.89	24.5	5_2898965	5_4373666	2898965	4373666	168
C13-norisoprenoids total	C13-norisoprenoid	post-veraison 2019	chr05	4.7	23.7	5_2898965	5_4373666	2898965	4373666	168
C13-norisoprenoids total	C13-norisoprenoid	harvest ripe 2021	chr05	3.6	20.1	5_2898965	5_4373666	2898965	4373666	168
Decanal	Aldehyde	harvest ripe 2021	chr05	4.68	23.3	5_2898965	5_4373666	2898965	4373666	168
Geraniol	Monoterpene	harvest ripe 2021	chr05	4.8	25.8	5_2898965	5_4373666	2898965	4373666	168
Geraniol	Monoterpene	post-veraison 2019	chr05	6.59	25.2	5_2898965	5_4373666	2898965	4373666	168
Geraniol	Monoterpene	pre-veraison 2019	chr05	5.66	22.3	5_2898965	5_4373666	2898965	4373666	168
Geranyl acetone	C13-norisoprenoid	post-veraison 2019	chr05	4.29	21.9	5_2898965	5_4373666	2898965	4373666	168
Ketones total	Ketone	post-veraison 2019	chr05	3.76	19.5	5_2898965	5_4373666	2898965	4373666	168
Limonene	Monoterpene	post-veraison 2019	chr05	13.42	46.9	5_2898965	5_4373666	2898965	4373666	168
Limonene	Monoterpene	harvest ripe 2021	chr05	9.95	46.2	5_2898965	5_4373666	2898965	4373666	168
Limonene	Monoterpene	pre-veraison 2019	chr05	12.07	41	5_2898965	5_4373666	2898965	4373666	168
Linalool	Monoterpene	harvest ripe 2021	chr05	10.05	46.5	5_2898965	5_4373666	2898965	4373666	168
Linalool Oxide	Monoterpene	harvest ripe 2021	chr05	10.23	47.1	5_2898965	5_4373666	2898965	4373666	168
Linalool Oxide	Monoterpene	pre-veraison 2019	chr05	9.11	40.8	5_2898965	5_4373666	2898965	4373666	168
Linalool Oxide	Monoterpene	post-veraison 2019	chr05	11.43	48.2	5_2898965	5_4373666	2898965	4373666	168
Monoterpenes total	Monoterpene	post-veraison 2019	chr05	12.34	50.9	5_2898965	5_4373666	2898965	4373666	168
Monoterpenes total	Monoterpene	pre-veraison 2019	chr05	10.19	44.4	5_2898965	5_4373666	2898965	4373666	168
Monoterpenes total	Monoterpene	harvest ripe 2021	chr05	7.54	37.5	5_2898965	5_4373666	2898965	4373666	168
Nerol oxide	Monoterpene	post-veraison 2019	chr05	8.15	29.1	5_2898965	5_4373666	2898965	4373666	168
Nerol oxide	Monoterpene	pre-veraison 2019	chr05	7.34	29.9	5_2898965	5_4373666	2898965	4373666	168
Nonanal	Aldehyde	post-veraison 2019	chr05	2.84	15.1	5_2898965	5_4373666	2898965	4373666	168
p-Cymene	Monoterpene	harvest ripe 2021	chr05	6.96	25.5	5_2898965	5_4373666	2898965	4373666	168
Terpinene-4-ol	Monoterpene	post-veraison 2019	chr05	8.15	29.1	5_2898965	5_4373666	2898965	4373666	168
Terpinene-4-ol	Monoterpene	pre-veraison 2019	chr05	7.7	26.3	5_2898965	5_4373666	2898965	4373666	168
Terpinene-4-ol	Monoterpene	harvest ripe 2021	chr05	5.99	21.3	5_2898965	5_4373666	2898965	4373666	168
trans-β-Ocimene	Monoterpene	harvest ripe 2021	chr05	6.74	34.3	5_2898965	5_4373666	2898965	4373666	168
α-terpinene	Monoterpene	post-veraison 2019	chr05	6.93	26.2	5_2898965	5_4373666	2898965	4373666	168
α-terpinene	Monoterpene	harvest ripe 2021	chr05	6.73	25.4	5_2898965	5_4373666	2898965	4373666	168
α-Terpineol	Monoterpene	post-veraison 2019	chr05	12.49	43.1	5_2898965	5_4373666	2898965	4373666	168
α-Terpineol	Monoterpene	pre-veraison 2019	chr05	11.9	40.4	5_2898965	5_4373666	2898965	4373666	168
α-Terpineol	Monoterpene	harvest ripe 2021	chr05	8.06	39.4	5_2898965	5_4373666	2898965	4373666	168
α-terpinolene	Monoterpene	harvest ripe 2021	chr05	6.76	34.3	5_2898965	5_4373666	2898965	4373666	168
α-terpinolene	Monoterpene	post-veraison 2019	chr05	9.42	34.3	5_2898965	5_4373666	2898965	4373666	168
α-terpinolene	Monoterpene	pre-veraison 2019	chr05	8.55	30	5_2898965	5_4373666	2898965	4373666	168
β-Myrcene	Monoterpene	harvest ripe 2021	chr05	6.81	34.6	5_2898965	5_4373666	2898965	4373666	168
β-Myrcene	Monoterpene	pre-veraison 2019	chr05	7.01	26.3	5_2898965	5_4373666	2898965	4373666	168
β-Myrcene	Monoterpene	post-veraison 2019	chr05	8.18	30.5	5_2898965	5_4373666	2898965	4373666	168
γ-Terpinene	Monoterpene	harvest ripe 2021	chr05	4.34	20	5_2898965	5_4373666	2898965	4373666	168
Nonanal	Aldehyde	pre-veraison 2019	chr05	2.59	13.8	5_4058168	5_4373666	4058168	4373666	32
cis-Rose oxide	Monoterpene	harvest ripe 2022	chr05	3.06	13	5_5536336	5_5708246	5536336	5708246	15
Alcohols total	Alcohol	harvest ripe 2022	chr07	3.91	21.3	Un_17734014	Un_37280175	18449368	18800829	44
Cyclohexanol	Alcohol	harvest ripe 2022	chr07	3.82	20.9	Un_35571806	Un_35181475	19311627	19780499	64
Ketones total	Ketone	pre-veraison 2019	chr07	3.18	16.7	7_14441664	7_14749380	18173415	18478275	44
(E)-3-Hexen-1-ol	Alcohol	harvest ripe 2022	chr08	3.22	17.9	8_21971536	8_22330438	21971536	22330438	40
1-Hexanol	Alcohol	harvest ripe 2022	chr08	3.38	18.8	8_3524827	8_4314904	3524827	4314904	45
Alcohols total	Alcohol	harvest ripe 2022	chr08	3.71	20.4	8_3524827	8_4314904	3524827	4314904	45
B-Damascenone	C13-norisoprenoid	harvest ripe 2021	chr08	3.73	20.7	8_20127914	8_20746592	20127914	20746592	86
Cyclohexanol	Alcohol	harvest ripe 2022	chr08	3.25	18.1	ae_8_3638139	8_4314904	3638139	4314904	41
Decanal	Aldehyde	harvest ripe 2022	chr09	5.8	28.6	9_3468198	9_3763630	3468198	3763630	37
(E)-Citral	Monoterpene	post-veraison 2019	chr10	3.81	16.9	10_3117522	li_10_3220375	6676157	6779010	10
Beta-Citronellol/Nerol	Monoterpene	post-veraison 2019	chr10	6.77	26.4	10_1812151	10_2061894	5370786	5620529	25
Linalool	Monoterpene	post-veraison 2019	chr10	3.03	16	10_5600150	10_6309328	9158785	9867963	51
Monoterpenes total	Monoterpene	post-veraison 2019	chr10	3.15	16.6	10_5600150	10_6309328	9158785	9867963	51
Pentenal	Aldehyde	post-veraison 2019	chr10	2.78	14.8	10_7047947	10_7769984	10606582	11328619	37
β-Myrcene	Monoterpene	post-veraison 2019	chr10	6.74	31	10_1812151	10_2061894	5370786	5620529	25
β-Myrcene	Monoterpene	post-veraison 2019	chr10	4.47	19.2	10_2126851	10_2409671	5685486	5968306	18
γ-Terpinene	Monoterpene	harvest ripe 2021	chr11	3.01	13.3	11_13770978	11_13792859	12162917	12184798	2
Geraniol	Monoterpene	pre-veraison 2019	chr12	3.19	11.7	12_7703996	12_8027752	7703996	8027752	44
β-Myrcene	Monoterpene	pre-veraison 2019	chr12	3.54	12	12_7703996	12_8027752	7703996	8027752	44
Geraniol	Monoterpene	post-veraison 2019	chr12	3.36	11.7	12_7725827	VMC1G3.2-cjvh	7725827	9589001	225
β-Myrcene	Monoterpene	post-veraison 2019	chr12	3.17	10.2	12_7725827	12_8027752	7725827	8027752	597
Linalool	Monoterpene	pre-veraison 2019	chr12	5.15	12	12_8085087	12_10039283	8085087	9654376	190
Esters total	Ester	harvest ripe 2022	chr13	3.87	18.7	13_9024382	13_10652062	9134305	10761985	127
Salicylic acid	Ester	harvest ripe 2022	chr13	3.21	16	13_9024382	13_10652062	9134305	10761985	127
α-Terpineol	Monoterpene	post-veraison 2019	chr13	7.42	21.9	13_1219591	13_307173	18786002	1969842	67
α-terpinolene	Monoterpene	post-veraison 2019	chr13	6.95	23.6	13_1219591	13_307173	18786002	1969842	67
Terpinene-4-ol	Monoterpene	harvest ripe 2021	chr13	4.89	18.1	13_916529	13_19999020	19089064	20408913	104
1,8-Cineole	Monoterpene	pre-veraison 2019	chr13	5.12	25.8	13_348307	13_19919776	19657286	20488157	69
1,8-Cineole	Monoterpene	post-veraison 2019	chr13	4.32	22.3	13_348307	13_19919776	19657286	20488157	69
Limonene	Monoterpene	post-veraison 2019	chr13	5.93	16.8	13_348307	13_19919776	19657286	20488157	69
Nerol oxide	Monoterpene	post-veraison 2019	chr13	7.69	28.2	13_348307	13_19919776	19657286	20488157	69
p-Cymene	Monoterpene	post-veraison 2019	chr13	7.84	29.3	13_348307	13_19919776	19657286	20488157	69
p-Cymene	Monoterpene	harvest ripe 2021	chr13	4.94	16.9	13_348307	13_19919776	19657286	20488157	69
p-mentha-1,5-dien-8-ol	Monoterpene	pre-veraison 2019	chr13	7.47	27.7	13_348307	13_19919776	19657286	20488157	69
p-mentha-1,5-dien-8-ol	Monoterpene	post-veraison 2019	chr13	5.2	21.5	13_348307	13_19919776	19657286	20488157	69
Terpinene-4-ol	Monoterpene	pre-veraison 2019	chr13	8.92	32.3	13_348307	13_19919776	19657286	20488157	69
Terpinene-4-ol	Monoterpene	post-veraison 2019	chr13	7.69	28.2	13_348307	13_19919776	19657286	20488157	69
α-terpinene	Monoterpene	pre-veraison 2019	chr13	8.06	31	13_348307	13_19919776	19657286	20488157	69
α-terpinene	Monoterpene	post-veraison 2019	chr13	6.54	25.4	13_348307	13_19919776	19657286	20488157	69
γ-Terpinene	Monoterpene	pre-veraison 2019	chr13	8.43	31.5	13_348307	13_19919776	19657286	20488157	69
Limonene	Monoterpene	pre-veraison 2019	chr13	7.63	22.5	13_19999020	13_19656556	20408913	20751377	21
α-terpinene	Monoterpene	harvest ripe 2021	chr13	3.91	13.4	13_19999020	13_19656556	20408913	20751377	17
γ-Terpinene	Monoterpene	post-veraison 2019	chr13	6.52	24.8	13_19999020	13_19656556	20408913	20751377	17
p-Cymene	Monoterpene	pre-veraison 2019	chr13	9.57	34.7	13_19919776	13_19076358	20488157	21331575	51
p-mentha-1,5-dien-8-ol	Monoterpene	harvest ripe 2021	chr13	3.49	15.1	13_19919776	13_19076358	20488157	21331575	51
α-terpinolene	Monoterpene	pre-veraison 2019	chr13	7.94	27.4	13_19919776	13_19076358	20488157	21331575	51
α-Terpineol	Monoterpene	pre-veraison 2019	chr13	8.59	26.4	13_19076358	13_18635414	21331575	21772519	22
1,8-Cineole	Monoterpene	pre-veraison 2019	chr13	4.22	40.8	13_18557964	13_1538010	21849969	22005655	15
Beta-Citronellol/Nerol	Monoterpene	harvest ripe 2021	chr14	3.15	11.6	14_21774300	14_22118100	21774300	22118100	33
1-Hexanol	Alcohol	pre-veraison 2019	chr15	3.3	17.3	15_15913449	15_16305762	15913449	16305762	49
Beta-Citronellol/Nerol	Monoterpene	post-veraison 2019	chr16	2.85	9.9	16_18692578	16_18753963	20203528	20264913	13
(E)-Citral	Monoterpene	post-veraison 2019	chr17	3.18	13.8	17_2811105	17_2995609	2942733	3127237	12
cis-Rose oxide	Monoterpene	harvest ripe 2021	chr17	2.92	16.2	17_5712781	17_5959988	5844409	6091616	29
Nerol oxide	Monoterpene	post-veraison 2019	chr17	2.73	14.5	17_5712781	17_5959988	5844409	6091616	29
Nerol oxide	Monoterpene	pre-veraison 2019	chr17	3.03	10.8	17_5739811	17_5927601	5871439	6059229	24
cis-Rose oxide	Monoterpene	post-veraison 2019	chr17	3.49	18.2	17_5927601	17_6177553	6059229	6309181	35
(E)-Citral	Monoterpene	harvest ripe 2021	chr17	3.14	17.8	17_7230307	17_8049630	7361935	8181258	81
cis-Rose oxide	Monoterpene	pre-veraison 2019	chr17	4.81	20.5	17_7230307	17_8049630	7361935	8181258	81
Heptanal	Aldehyde	harvest ripe 2022	chr18	3.52	19.4	18_3085954	18_25200872	27495841	28617893	109
Heptanal	Aldehyde	pre-veraison 2019	chr18	4.31	21.8	18_20720495	18_21382580	23665429	24327514	41
Nonanal	Aldehyde	harvest ripe 2022	chr18	2.73	15.4	18_3085954	18_25200872	27495841	28617893	109
p-Cymene	Monoterpene	harvest ripe 2021	chr18	3.63	11.9	5_7571058	18_25200872	7571058	28617893	1713
Terpinene-4-ol	Monoterpene	harvest ripe 2021	chr18	3.17	10.3	5_7571058	18_25200872	7571058	28617893	1713
α-terpinene	Monoterpene	harvest ripe 2021	chr18	3.48	11.8	18_24467042	18_25262086	27884063	28679107	81
trans-2-Hexenal	Aldehyde	pre-veraison 2019	chr19	3.27	17.2	19_7362774	19_8367699	7362774	8367699	105
Alpha-Copaene	Sesquiterpene	pre-veraison 2019	chr19	6.21	30.1	19_8950369	19_19964548	8950369	20638362	984
Alpha-Cubebene	Sesquiterpene	pre-veraison 2019	chr19	6.11	29.7	19_8950369	19_19964548	8950369	20638362	984
Alpha-Cubebene	Sesquiterpene	post-veraison 2019	chr19	3.41	17.8	19_8950369	19_19964548	8950369	20638362	984
Delta-Cadinene	Sesquiterpene	pre-veraison 2019	chr19	2.34	12.6	19_8950369	19_19964548	8950369	20638362	984
Trans-Caryophyllene	Sesquiterpene	pre-veraison 2019	chr19	8	36.9	19_8950369	19_19964548	8950369	20638362	984
Trans-Caryophyllene	Sesquiterpene	post-veraison 2019	chr19	3.6	18.7	19_8950369	19_19964548	8950369	20638362	984
p-mentha-1,5-dien-8-ol	Monoterpene	pre-veraison 2019	chr19	2.9	9.4	19_15486538	ae_19_16821449	18218712	15596674	133
Aldehydes total	Aldehyde	harvest ripe 2022	chr19	3.83	20.9	19_20080476	VMC7B1	20754290	23628578	220
trans-2-Hexenal	Aldehyde	harvest ripe 2022	chr19	4.62	24.7	19_20080476	VMC7B1	20754290	23628578	220

## Sheet: S5
Table S5 List of SADs and SDRs used to create phylogenetic trees in Figures S2 and S3 with their associated accession numbers and species of origin
Gene name	Accession	Organism
ABA2 (Xanthoxin dehydrogenase)	Q9C826	Arabidopsis thaliana (thale cress)
ATA1	Q9M1K9	Arabidopsis thaliana (thale cress)
AtNOL (Chlorophyll(ide) b reductase)	Q8LEU3	Arabidopsis thaliana (thale cress)
AtSDR1	F4IKM1	Arabidopsis thaliana (thale cress)
AtSDR1 ((+)-neomenthol dehydrogenase)	Q9M2E2	Arabidopsis thaliana (thale cress)
AtSDR3a	O80713	Arabidopsis thaliana (thale cress)
AtSDR3b	Q94K41	Arabidopsis thaliana (thale cress)
AtSDR3c	O80714	Arabidopsis thaliana (thale cress)
AtSDR4	F4J2Z7	Arabidopsis thaliana (thale cress)
AtSDR5	F4J300	Arabidopsis thaliana (thale cress)
CoSDR (Tropinone reductase)	A7DY56	Cochlearia officinalis (scurvygrass)
DsTRN1 (Tropinone reductase)	P50162	Datura stramonium (jimsonweed)
HcADH (short chain alcohol dehydrogenase/reductase)	AGY49282.1	Hedychium coronarium (white ginger lily)
HSD1 (11-beta-hydroxysteroid dehydrogenase)	P0DKC5	Arabidopsis thaliana (thale cress)
HSD1B (11-beta-hydroxysteroid dehydrogenase)	P0DKC6	Arabidopsis thaliana (thale cress)
ISPD ((-)-isopiperitenol/(-)-carveol dehydrogenase)	Q5C9I9.1	Mentha piperita (Peppermint)
LiBDH (Borneol dehydrogenase)	K4N0V2.1	Lavandula x intermedia (lavender)
NEPS1 ((+)-cis,trans-nepetalactol synthase)	A0A3Q8GL18	Nepeta racemosa (catmint)
NEPS2 ((+)-cis,trans-nepetalactol synthase)	A0A3Q8GYY4	Nepeta racemosa (catmint)
NEPS3 ((+)-cis,cis-nepetalactol synthase)	A0A3Q8GLE8	Nepeta racemosa (catmint)
ObaGEDH1 (geraniol dehydrogenase)	Q2KNL6.1	Ocimum basilicum (sweet basil)
OsNOL (Chlorophyll(ide) b reductase)	Q84ST4	Oryza sativa subsp. japonica (rice)
PbSALR (Salutaridine reductase)	A4UHT7	Papaver bracteatum (Poppy)
PsSALR (Salutaridine reductase)	Q071N0	Papaver somniferum (opium poppy)
PsSDR1 (Noscapine synthase)	SVI3PLR3	Papaver somniferum (opium poppy)
SAG13 (Senescence-associated protein)	Q9ZW18	Arabidopsis thaliana (thale cress)
SDR2A	Q9SCU0	Arabidopsis thaliana (thale cress)
SDR2B	Q9ZUH5	Arabidopsis thaliana (thale cress)
SDRA	Q9S9W2	Arabidopsis thaliana (thale cress)
SoBDH1 ((+)-borneol dehydrogenase)	A0A8F5SIS3.1	Salvia officinalis (garden sage)
SoBDH2 ((+)-borneol dehydrogenase)	A0A8F5XX49.1	Salvia officinalis (garden sage)
TRNH1 (Tropinone reductase)	P0DKI3	Arabidopsis thaliana (thale cress)
TRNH2 (Tropinone reductase)	Q8RX32	Arabidopsis thaliana (thale cress)
TRNH3 (Tropinone reductase)	Q9ZW03	Arabidopsis thaliana (thale cress)
TRNH4 (Tropinone reductase)	Q9ZW04	Arabidopsis thaliana (thale cress)
TRNH5 (Tropinone reductase)	Q9ZW12	Arabidopsis thaliana (thale cress)
TRNH6 (Tropinone reductase)	Q9ZW13	Arabidopsis thaliana (thale cress)
TRNH7 (Tropinone reductase)	Q42182	Arabidopsis thaliana (thale cress)
TRNH8 (Tropinone reductase)	Q9ZW14	Arabidopsis thaliana (thale cress)
TRNH9 (Tropinone reductase)	Q9ZW15	Arabidopsis thaliana (thale cress)
TRNHA (Tropinone reductase)	Q9ZW16	Arabidopsis thaliana (thale cress)
TRNHC (Tropinone reductase)	Q9ZW19	Arabidopsis thaliana (thale cress)
TRNHD (Tropinone reductase)	Q9ZW20	Arabidopsis thaliana (thale cress)
TRNHE (Tropinone reductase)	O49332	Arabidopsis thaliana (thale cress)
TRNHF (Tropinone reductase)	Q9LHT0	Arabidopsis thaliana (thale cress)
VEP1 (3-oxo-Delta(4,5)-steroid 5-beta-reductase)	Q9STX2	Arabidopsis thaliana (thale cress)
VvSDR1	Vitvi17g00534	Vitis vinifera (grapevine)
VvSDR2	Vitvi17g00535	Vitis vinifera (grapevine)
VvSDR3	Vitvi17g01453	Vitis vinifera (grapevine)
VvSDR4	Vitvi17g00537	Vitis vinifera (grapevine)
VvSDR5	Vitvi17g00538	Vitis vinifera (grapevine)
ZSD1 (Zerumbone synthase)	F1SWA0.1	Zingiber zerumbet (bitter ginger)
AtSAD1	Q9LF05.3	Arabidopsis thaliana (thale cress)
AtSAD2	Q9M881.1	Arabidopsis thaliana (thale cress
AtSAD3	O22832.1	Arabidopsis thaliana (thale cress)
AtSAD4	Q84VY3.2	Arabidopsis thaliana (thale cress)
AtSAD5	Q9M879.1	Arabidopsis thaliana (thale cress)
AtSAD6	Q9LF04.1	Arabidopsis thaliana (thale cress)
AtSAD7	Q9M880.2	Arabidopsis thaliana (thale cress)
BnSAD1	Q01771.1	Brassica napus (rapeseed)
BnSAD2	P29108.1	Brassica napus (rapeseed)
CtSAD	P22243.1	Carthamus tinctorius (safflower)
EgSAD	O24428.2	Elaeis guineensis (African oil palm)
GhSAD	Q42770.1	Gossypium hirsutum (cotton)
GmSAD	Q42807.1	Glycine max (soybean)
HaSAD	Q96456.1	Helianthus annuus (common sunflower)
LuSAD	P32062.1	Linum usitatissimum (flax)
OaSAD	E3PZS3.1	Ophrys x arachnitiformis (false spider orchid)
OeSAD	Q43593.1	Olea europaea (common olive)
OspSAD1	E3PZS2.1	Ophrys sphegodes (early spider orchid)
OspSAD2	E3PZS1.1	Ophrys sphegodes (early spider orchid)
OsSAD1	Q40731.2	Oryza sativa Japonica Group (Japanese rice)
OsSAD2	Q8S059.1	Oryza sativa Japonica Group (Japanese rice)
OsSAD3	Q8LJJ9.1	Oryza sativa Japonica Group (Japanese rice)
OsSAD4	A2XSL4.1	Oryza sativa Indica Group (long-grained rice)
OsSAD5	A2WYF4.1	Oryza sativa Indica Group (long-grained rice)
OsSAD6	B8A7A3.1	Oryza sativa Indica Group (long-grained rice)
RcSAD	P22337.1	Ricinus communis
ScoSAD	Q41319.2	Solanum commersonii (Commerson's wild potato)
ScSAD	Q01753.1	Simmondsia chinensis (jojoba)
SoSAD	P28645.1	Spinacia oleracea (spinach)
VvSAD	Vitvi02g01527	Vitis vinifera (grapevine)

## Sheet: S6
Table S6 The VvTPSs that co-segregate with the QTLs on chromosome 12 and 13
Accession	VvTPS gene model
Chromosome 13
Vitvi13g01875	VvTPS122
Vitvi13g01307	VvTPS39
Vitvi13g01312	VvTPS121
Vitvi13g01313	VvTPS120
Vitvi13g01874	VvTPS119
Vitvi13g01314	VvTPS118
Vitvi13g01317	VvTPS117
Vitvi13g01876	VvTPS37
Vitvi13g01873	VvTPS116
Vitvi13g01320	VvTPS106
Vitvi13g01870	VvTPS115
Chromosome 12
Vitvi12g00563	VviTPS32
Vitvi12g00565	VviTPS33
Vitvi12g00573	VviTPS34
Vitvi12g00574	VviTPS35
Vitvi12g00576	VviTPS36
Vitvi12g02177	VviTPS51
Vitvi12g02176	VviTPS48
Vitvi12g02178	VviTPS52

## Sheet: S7
Table S7 The presence/absence of the VvDXS1 SNP in 82 progenies of the mapping population (Deckrot x G1-7720).
Nr	Progeny ID	DXS SNP
1	DG_001	GT
2	DG_002	GT
3	DG_007	GT
4	DG_013	GG
5	DG_023	GG
6	DG_028	GG
7	DG_030	GT
8	DG_032	GT
9	DG_034	GT
10	DG_037	GT
11	DG_038	GT
12	DG_041	GT
13	DG_042	GT
14	DG_046	GG
15	DG_047	GG
16	DG_052	GG
17	DG_055	GG
18	DG_058	GT
19	DG_060	GT
20	DG_062	GT
21	DG_063	GG
22	DG_068	GG
23	DG_071	GT
24	DG_074	GT
25	DG_081	GG
26	DG_082	GT
27	DG_085	GG
28	DG_086	GT
29	DG_087	GT
30	DG_089	GG
31	DG_091	GG
32	DG_094	GT
33	DG_097	GG
34	DG_098	GG
35	DG_100	GT
36	DG_101	GT
37	DG_104	GG
38	DG_105	GT
39	DG_106	GT
40	DG_110	GG
41	DG_111	GG
42	DG_114	GG
43	DG_115	GT
44	DG_116	GT
45	DG_118	GT
46	DG_122	GT
47	DG_124	GT
48	DG_125	GT
49	DG_126	GT
50	DG_127	GT
51	DG_129	GT
52	DG_130	GT
53	DG_135	GT
54	DG_141	GG
55	DG_144	GT
56	DG_146	GG
57	DG_149	GG
58	DG_151	GT
59	DG_154	GT
60	DG_155	GT
61	DG_157	GT
62	DG_166	GG
63	DG_168	GG
64	DG_172	GT
65	DG_173	GT
66	DG_176	GT
67	DG_177	GT
68	DG_179	GG
69	DG_181	GG
70	DG_183	GG
71	DG_184	GG
72	DG_197	GT
73	DG_201	GG
74	DG_205	GT
75	DG_208	GT
76	DG_212	GT
77	DG_214	GG
78	DG_215	GT
79	DG_222	GG
80	DG_223	GT
81	DG_224	GT
82	DG_225	GG
Parent	Deckrot	GG
Parent	G1-7720	GT

## Sheet: S8
Table S8. Nucleotide sequence of VvTer and VvGer gene copies isloated from 'Deckrot' (DR) and G1-7720 (G1)
Clone ID	Nucleotide Sequence
DRGer01	ATGGCTTTGAATATGAGCAGGTTCGTTACCATGCCTTCACATGTGCTGCCATCTTCCTTTGTCGCTCCTTCACTTCAAGTCTCATCGTCTCCTTGTTCATGGCGGACGCGCCCCTCCCCTTGCACCAGGTGTCATTTATCGCCATCATCATCGTCAAAGCCACTGCTTGGAAGCCATGATTATTCTTTGCTCAAGCCCTTAACTCTATCTCCACATGTGGTGAATTCTGAAGCTGATAGCAGCACCAGAAGGATGAAAGAAGTGAAGGAAAGAACCCGGGAGGCATTCTATAGAGCTTGGGATTCAAGGGCTGCTATGGAGATGGTAGACACAGTTGAGAGGCTAGGTCTATCATACCATTTTGAAGGCGAGATAAATGCACTATTGCAAAGGTTCTGC…
DRGer02	ATGGCTTTGAATATGAGCAGGTTCGTTACCATGCCTTCACATGTGCTGCCATCTTCCTTTGTCGCTCCTTCACTTCAAGTCTCATCGTCTCCTTGTTCATGGCGGACGCGCCCCTCCCCTTGCACCAGGTGTCATTTATCGCCATCATCATCGTCAAAGCCACTGCTTGGAAGCCATGATTATTCTTTGCTCAAGTCCTTAACTCTATCTCCACATATGGTGAATTCTGAAGCTGATAGCAGCACCAGAAGGATGAAAGAAGTGAAGGAAAGAACCCGGGAGGCATTCTATAGAGCTTGGGATTCAAGGGCTGCTATGGAGATGGTAGACACAGTTGAGAGGCTAGGTCTATCATACCATTTTGAAGGCGAGATAAATGCACTATTGCAAAGGTTCTGC…
DRGer03	ATGGCTTTGAATATGAGCAGGTTCGTTACCATGCCTTCACATGTGCTGCCATCTTCCTTTGTCGCTCCTTCACTTCAAGTCTCATCGTCTCCTTGTTCATGGCGGACGCGCCCCTCCCCTTGCACCAGGTGTCATTTATCGCCATCATCATCGTCAAAGCCACTGCTTGGAAGCCATGATTATTCTTTGCTCAAGTCCTTAACTCTATCTCCACATGTGGTGAATTCTGAAGCTGATAGCAGCACCAGAAGGATGAAAGAAGTGAAGGAAAGAACCCGGGAGGCATTCTATAGAGCTTGGGATTCAAGGGCTGCTATGGAGATGGTAGACACAGTTGAGAGGCTAGGTCTATCATACCATTTTGAAGGCGAGATAAATGCACTATTGCAAAGGTTCTGC…
DRGer04	ATGGCTTTGAATATGAGCAGGTTCGTTACCATGCCTTCACATGTGCTGCCATCTTCCTTTGTCGCTCCTTCACTTCAAGTCTCATCGTCTCCTTGTTCATGGCGGACGCGCCCCTCCCCTTGCACCAGCTGCCATTTATCGCCATCATCATCGTCAAAGCCACTGCTTGGAAGCCATGATTATTCTTTGCTCAAGTCCTTAACTCTATCTCCACATGCGGTGAATTCTGAAGCTGATAGCAGCACCAGAAGGATGAAAGAAGTGAAGGAAAGAACCTGGGAGGCATTCTATAGAGCTTGGGATTCAAGGGCTGCTATGGAGATGGTAGACACAGTTGAGAGGCTAGGTCTATCATACCATTTTGAAGACGAGATAAATGCACTATTGCAAAGGTTCTGC…
DRGer05	ATGGCTTTGAATATGAGCAGGTTCGTTACCATGCCTTCACATGTGCTGCCATCTTCCTTTGTCGCTCCTTCACTTCAAGTCTCATCGTCTCCTTGTTCATGGCGGACGCGCCCCTCCCCTTGCACCAGGTGTCATTTATCGCCATCATCATCGTCAAAGCCACTGCTTGGAAGCCATGATTATTCTTTGCTCAAGTCCTTAACTCTATCTCCACATGTGGTGAATTCTGAAGCTGATAGCAGCACCAGAAGGATGAAAGAAGTGAAGGAAAGAACCCGGGAGGCATTCTATAGAGCTTGGGATTCAAGGGCTGCTATGGAGATGGTAGACACGGTTGAGAGGCTAGGTCTATCATACCATTTTGAAGGCGAGATAAATGCACTATTGCAAAGGTTCTGC…
DRGer06	ATGGCTTTGAATATGAGCAGGTTCGTTACCATGCCTTCACATGTGCTGCCATCTTCCTTTGTCGCTCCTTCACTTCAAGTCTCATCGTCTCCTTGTTCATGGCGGACGCGCCCCTCCCCTTGCACCAGCTGCCATTTATCGCCATCATCATCGTCAAAGCCACTGCTTGGAAGCCATGATTATTCTTTGCTCAAGTCCTTAACTCTATCTCCACATGCGGTGAATTCTGAAGCTGATAGCAGCACCAGAAGGATGAAAGAAGTGAAGGAAAGAACCTGGGAGGCATTCTATAGAGCTTGGGATTCAAGGGCTGCTATGGAGATGGTAGACACAGTTGAGAGGCTAGGTCTATCATACCATTTTGAAGACGAGATAAATGCACTATTGCAAAGGTTCTGC…
DRGer07	ATGGCTTTGAATATGAGCAGGTTCGTTACCATGCCTTCACATGTGCTGCCATCTTCCTTTGTCGCTCCTTCACTTCAAGTCTCATCGTCTCCTTGTTCATGGCGGACGCGCCCCTCCCCTTGCACCAGCTGCCATTTATCGCCATCATCATCGTCAAAGCCACTGCTTGGAAGCCATGATTATTCTTTGCTCAAGTCCTTAACTCTATCTCCACATGCGGTGAATTCTGAAGCTGATAGCAGCACCAGAAGGATGAAAGAAGTGAAGGAAAGAACCTGGGAGGCATTCTATAGAGCTTGGGATTCAAGGGCTGCTATGGAGATGGTAGACACAGTTGAGAGGCTAGGTCTATCATACCATTTTGAAGACGAGATAAATGCACTATTGCAAAGGTTCTGC…
DRGer08	ATGGCTTTGAATATGAGCAGGTTCGTTACCATGCCTTCACATGTGCTGCCATCTTCCTTTGTCGCTCCTTCACTTCAAGTCTCATCGTCTCCTTGTTCATGGCGGACGCGCCCCTCCCCTTGCACCAGGTGTCATTTATCGCCATCATCATCGTCAAAGCCACTGCTTGGAAGCCATGATTATTCTTTGCTCAAGTCCTTAACTCTATCTCCACATGTGGTGAATTCTGAAGCTGATAGCAGCACCAGAAGGATGAAAGAAGTGAAGGAAAGAACCCGGGAGGCATTCTATAGAGCTTGGGATTCAAGGGCTGCTATGGAGATGGTAGACACAGTTGAGAGGCTAGGTCTATCATACCATTTTGAAGGCGAGATAAATGCACTATTGCAAAGGTTCTGC…
DRGer09	ATGGCTTTGAATATGAGCAGGTTCGTTACCATGCCTTCACATGTGCTGCCATCTTCCTTTGTCGCTCCTTCACTTCAAGTCTCATCGTCTCCTTGTTCATGGCGGACGCGCCCCTCCCCTTGCACCAGGTGTCATTTATCGCCATCATCATCGTCAAAGCCACTGCTTGGAAGCCATGATTATTCTTTGCTCAAGTCCTTAACTCTATCTCCACATGTGGTGAATTCTGAAGCTGATAGCAGCACCAGAAGGATGAAAGAAGTGGAGGAAAGAACCCGGGAGGCATTCTATAGAGCTTGGGATTCAAGGGCTGCTATGGAGATGGTAGACACAGTTGAGAGGCTAGGTCTATCATACCATTTTGAAGGCGAGATAAATGCACTATTGCAAAGGTTCTGC…
DRGer10	ATGGCTTTGAATATGAGCAGGTTCGTTACCATGCCTTCACATGTGCTGCCATCTTCCTTTGTCGCTCCTTCACTTCAAGTCTCATCGTCTCCTTGTTCATGGCGGACGCGCCCCTCCCCTTGCACCAGGTGTCATTTATCGCCATCATCATCGTCAAAGCCACTGCTTGGAAGCCATGATTATTCTTTGCTCAAGTCCTTAACTCTATCTCCACATGTGGTGAATTCTGAAGCTGATAGCAGCACCAGAAGGATGAAAGAAGTGAAGGAAAGAACCTGGGAGGCATTCTATAGAGCTTGGGATTCAAGGGCTGCTATGGAGATGGTAGACACAGTTGAGAGGCTAGGTCTATCATACCATTTTGAAGACGAGATAAATGCACTATTGCAAAGGTTCTGC…
DRGer11	ATGGCTTTGAATATGAGCAGGTTCGTTACCATGCCTTCACATGTGCTGCCATCTTCCTTTGTCGCTCCTTCACTTCAAGTCTCATCGTCTCCTTGTTCATGGCGGACGCGCCCCTCCCCTTGCACCAGCTGCCATTTATCGCCATCATCATCGTCAAAGCCACTGCTTGGAAGCCATGATTATTCCTTGCTCAAGTCCTTAACTCTATCTCCACATGCGGTGAATTCTGAAGCTGATAGCAGCACCAGAAGGATGAAAGAAGTGAAGGAAAGAACCTGGGAGGCATTCTATAGAGCTTGGGATTCAAGGGCTGCTATGGAGATGGTAGACACAGTTGAGAGGCTGGGTCTATCATACCATTTTGAAGACGAGATAAATGCACTATTGCAAAGGTTCTGC…
DRGer12	ATGGCTTTGAATATGAGCAGGTTCGTTACCATGCCTTCACATGTGCTGCCATCTTCCTTTGTCGCTCCTTCACTTCAAGTCTCATCGTCTCCTTGTTCATGGCGGACGCGCCCCTCCCCTTGCACCAGGTGTCATTTATCGCCATCATCATCGTCAAAGCCACTGCTTGGAAGCCATGATTATTCTTTGCTCAAGTCCTTAACTCTATCTCCACATGTGGTGAATTCTGAAGCTGATAGCAGCACCAGAAGGATGAAAGAAGTGAAGGAAAGAACCCGGGAGGCATTCTATAGAGCTTGGGATTCAGGGGCTGCTATGGAGATGGTAGACACAGTTGAGAGGCTAGGTCTATCATACCATTTTGAAGGCGAGATAAATGCACTATTGCAAAGGTTCTGC…
DRGer13	ATGGCTTTGAATATGAGCAGGTTCGTTACCATGCCTTCACATGTGCTGCCATCTTCCTTTGTCGCTCCTTCACTTCAAGTCTCATCGTCTCCTTGTTCATGGCGGACGCGCCCCTCCCCTTGCACCAGCTGCCATTTATCGCCATCATCATCGTCAAAGCCACTGCTTGGAAGCCATGATTATTCTTTGCTCAAGTCCTTAACTCTATCTCCACATGCGGTGAATTCTGAAGCTGATAGCAGCACCAGAAGGATGAAAGAAGTGAAGGGAAGAACCTGGGAGGCATTCTATAGAGCTTGGGATTCAAGGGCTGCTATGGAGATGGTAGACACAGTTGAGAGGCTAGGTCTATCATACCATTTTGAAGACGAGATAAATGCACTATTGCAAAGGTTCTGC…
DRGer14	ATGGCTTTGAATATGAGCAGGTTCGTTACCACGCCTTCACATGTGCTGCCATCTTCCTTTGTCGCTCCTTCACTTCAAGTCTCATCGTCTCCTTGTTCATGGCGGACGCGCCCCTCCCCTTGCACCAGCTGCCATTTATCGCCATCATCATCGTCAAAGCCACTGCTTGGAAGCCATGATTATTCTTTGCTCAAGTCCTTAACTCTATCTCCACATGCGGTGAATTCTGAAGCTGATAGCAGCACCAGAAGGATGAAAGAAGTGAAGGAAAGAACCTGGGAGGCATTCTATAGAGCTTGGGATTCAAGGGCTGCTATGGAGATGGTAGACACAGTTGAGAGGCTAGGTCTATCATACCATTTTGAAGACGAGATAAATGCACTATTGCAAAGGTTCTGC…
DRTer01	ATGGCTCTTTCCATGCTTGCTTCAATTCCTAATCTGATCACGCACACAAGACTTCCAATCATAACAAAATCCAGCAGCTGTAAGGCTTCTCCTAGAGGAATCAAGGTCAAAATTGGCAACAGCAATTGTGAGGAAATCACTGTTAGGCGAACTGCAAACTACCAGCCTACCATTTGGGACTATGATTATGTGCAGTCACTAAGAAGTGATTATGTGGGAGAAACATACACCAGAAGACTTGATAAGCTAAAGAGAGATGTGAAGCCAATGCTTGGCAAAGTGAAGAAGCCTTTGGATCAGCTGGAGCTAATCGATGTCTTGCAAAGGCTTGGAATATATTATCACTTCAAGGATGAAATAAAGAGAATATTGAACAGCATATACAACCAGTACAATCGG…
DRTer02	ATGGCTCTTTCCATGCTTGCTTCAATTCCTAATCTGATCACGCACACAAGACTTCCAATCATAACAAAATCCAGCAGCTGTAAGGCTTCTCCTAGAGGAATCAAGGTCAAAATTGGCAACAGCAATTGTGAGGAAATCACTGTTAGGCGAACTGCAAACTACCAGCCTACCATTTGGGACTATGATTATGTGCGGTCACTTAGAAGTGATTATGTGGGAGAAACATACACCAGAAGACTTGATAAGCTAAAGAGAGATGTGAAGCCAATGCTTGGCAAAGTGAAGAAGCCTTTGGATCAGCTGGAGCTAATCGATGTCTTGCAAAGGCTTGGAATATATTATCACTTCAAGGATGAAATAAAGAGAATATTGAACAGCATATACAACCAGTACAATCGG…
DRTer03	ATGGCTCTTTCCATGCTTGCTTCAATTCCTAATCTGATCACGCACACAAGACTTCCAATCATAACAAAATCCAGCAGCTGTAAGGCTTCTCCTAGAGGAATCAAGGTCAAAATTGGCAACAGCAATTGTGAGGAAATCACTGTTAGGCGAACTGCAAACTACCAGCCTACCATTTGGGACTATGATTATGTGCAGTCACTAAGAAGTGATTATGTGGGAGAAACATACACCAGAAGACTTGATAAGCTAAAGAGAGATGTGAAGCCAATGCTTGGCAAAGTGAAGAAGCCTTTGGATCAGCTGGAGCTAATCGATGTCTTGCAAAGGCTTGGAATATATTATCACTTCAAGGATGAAATAAAGAGAATATTGAACAGCATATACAACCAGTACAATCGG…
DRTer04	ATGGCTCTTTCCATGCTTGCTTCAATTCCTAATCTGATCACGCATACAAGACTTCCAATCATAATAAAATCCAGCAGCTGTAAGGCTTCTCCTAGAGGAATCAAGGTCAAAATTGGCAACAGCAATTGTGAGGAAATCATTGTTAGGCGAACTGCAAACTACCATCCTACCATTTGGGACTATGATTATGTGCAGTCACTAAGAAGTGATTATGTGGGAGAAACATACACCAGAAGACTTGATAAGCTAAAGAGAGATGTGAAGCCAATGCTTGGCAAAGTGAAGAAGCCTTTGGATCAGCTGGAGCTAATCGATGTCTTGCAAAGGCTTGGAATATATTATCACTTCAAGGATGAAATAAAGAGGATATTGAACAGCATATACAACCAGTACAATCGG…
DRTer05	ATGGCTCTTTCCATGCTTGCTTCAATTCCTAATCTGATCACGCACACAAGACTTCCAATCATAATAAAATCCAGCAGCTGTAAGGCTTCTCCTAGAGGAATCAAGGTCAAAATTGGCAACAGCAATTGTGAGGAAATCATTGTTAGGCGAACTGCAAACTACCATCCTACCATTTGGGACTATGATTATGTGCAGTCACTAAGAAGTGATTATGTGGGAGAAACATACACCAGAAGACTTGATAAGCTAAAGAGAGATGTGAAGCCAATGCTTGGCAAAGTGAAGAAGCCTTTGGATCAGCTGGAGCTAATCGATGTCTTGCAAAGGCTTGGAATATATTATCACTTCAAGGATGAAATAAAGAGAATATTGAACAGCATATACAACCAGTACAATCGG…
DRTer06	ATGGCTCTTTCCATGCTTGCTTCAATTCCTAATCTGATCACGCACACAAGACTTCCAATCATAATAAAATCCAGCAGCTGTAAGGCTTCTCCTAGAGGAATCAAGGCCAAAATTGGCAACAGCAATTGTGAGGAAATCACTGTTAGGCGAACTGTAAACTACCAGCCTACCATTTGGGACTATGATTATGTGCGGTCACTTAGAAGTGATTATGTGGGAGAAACATACACCAGAAGACTTGATAAGCTAAAGAGAGATGTGAAGCCAATGCTTGGCAAAGTGAAGAAGCCTTTGGATCAGCTGGAGCTAATCGATGTCTTGCAAAGGCTTGGAATATATTATCACTTCAAGGATGAAATAAAGAGAATATTGAACAGCATATACAACCAGTACAATCGG…
DRTer07	ATGGCTCTTTCCATGCTTGCTTCAATTCCTATTCTGATCACTCACACAAGACTTCCAATTATGAGAAGATCCAGCAGTTGCAAGGCTTCTCCTCCAGGAAACCAATCTATGATTGGCAACAGCACTTGCGAGGAAATCATTGTTCGGCGTACTGCAAACTACCATCCTCCCATTTGGGACTATGATTATGTGCAATCACTGAGAAGTGATTATGTGGGAGAAATATACACCAGAAGACTTGATAAGCTAAAGAGAGAAGTGAAGCCAATGCTTGGGAAAGTGAAGAAGCCTTTGGATCAGCTGGAGCTAATCGATGTTTTGCAAAGGCTTGGACTATATTATCACTTCAAGGATGCAATAAAGAGAATATTGGACAGCATATACAACCAGTACAATCAG…
DRTer08	ATGGCTCTTTCCATGCTTGCTTCAATTCCTAATCTGATCACGCACACAAGACTTCCAATCATAATAAAATCCAGCAGCTGTAAGGCTTCTCCTAGAGGAATCAAGGTCAAAATTGGCAACAGCAATTGTGAGGAAATCATTGTTAGGCGAACTGCAAACTACCATCCTACCATTTGGGACTATGATTATGTGCAGTCACTAAGAAGTGATTATGTGGGAGAAACATACACCAGAAGACTTGATAAGCTAAAGAGAGATGTGAAGCCAATGCTTGGCAAAGTGAAGAAGCCTTTGGATCAGCTGGAGCTAATCGATGTCTTGCAAAGGCTTGGAATATATTATCACTTCAAGGATGAAATAAAGAGAATATTGAACAGCATATACAACCAGTACAATCGG…
DRTer09	ATGGCTCTTTCCATGCTTGCTTCAATTCCTAATCTGATCACGCACACAAGACTTCCAATCATAATAAAATCCAGCAGCTGTAAGGCTTCTCCTAGAGGAATCAAGGTCAAAATTGGCAACAGCAATTGTGAGGAAATCACTGTTAGGCGAACTGCAAACTACCAGCCTACCACTTGGGACTATGATTATGTGCGGTCACTTAGAAGTGATTATGTGGGAGAAACATACACCAGAAGACCTGATAAGCTAAAGAGAGATGTGAAGCCAATGCTTGGCAAAGTGAAGAAGCCTTTGGATCAGCTGGAGATAATCGATGTCTTGCAAAGGCTTGGAATATATTATCACTTCAAGGATGAAATAAAGAGAATATTGAACAGCATATACAACCAGTACAATCGG…
DRTer10	ATGGCTCTTTCCATGCTTGCTTCAATTCCTAATCTGATCACGCACACAAGACTTCCAATCATAATAAAATCCAGCAGCTGTAAGGCTTCTCCTAGAGGAATCAAGGTCAAAATTGGCAACAGCAATTGTGAGGAAATCATTGTTAGGCGAACTGCAAACTACCATCCTACCATTTGGGACTATGATTATGTGCAGTCACTAAGAAGTGATTATGTGGGAGAAACATACACCAGAAGACTTGATAAGCTAAAGAGAGATGTGAAGCCAATGCTTGGCAAAGTGAAGAAGCCTTTGGATCAGCTGGAGCTAATCGATGTCTTGCAAAGGCTTGGAATATATTATCACTTCAAGGATGAAATAAAGAGAATATTGAACAGCATATACAACCAGTACAATCGG…
DRTer11	ATGGCTCTTTCCATGCTTGCTTCAATTCCTAATCTTATCACGCACACAAGACTTCCAATCATAACAAAATCCAGCAGCTGTAAGGCTTCTCCTAGAGGAATCAAGGTCAAAATTGGCAACAGCAATTGTGAGGAAATCATTGTTAGGCGAACCGCAAACTACCATCCTACCATTTGGGACTATGATTATGTGCAGTCACTAAGAAGTGATTATGTGGGAGAAACATACACCAGAAGACTTGATAAGCTAAAGAGGGATGTGAAGCCAATGCTTGGCAAAGTGAAGAAGCCTTTGGATCAGCTGGAGCTAACAGATGTCTTGCAAAGGCTTGGAATATATTATCACTTCAAGGATGAAATAAAGAGAATATTGAACAGCATATACAACCAGTACAATCAG…
DRTer12	ATGGCTCTTTCCATGCTTGCTTCAATTCCTAATCTGATCACGCACACAAGACTTCCAATCATAATAAAATCCAGCAGCTGTAAGGCTTCTCCTAGAGGAATCAAGGTCAAAATTGGCAACAGCAATTGTGAGGAAATCATTGTTAGGCGAACTGCAAACTACCATCCTACCATTTGGGACTATGATTATGTGCAGTCACTAAGAAGTGATTATGTGGGAGAAACATACACCAGAAGACTTGATAAGCTAAAGAGAGATGTGAAGCCAATGCTTGGCAAAGTGAAGAAGCCTTTGGATCAGCTGGAGCTAATCGATGTCTTGCAAAGGCTTGGAATATATTATCACTTCAAGGATGAAATAAAGAGAATATTGAACAGCATATACAACTAGTACAATCGG…
DRTer13	ATGGCTCTTTCCATGCTTGCTTCAATTCCTAATCTGATCACGCACACAAGACTTCCAATCATAACAAAATCCAGCAGCTGTAAGGCTTCTCCTAGGGGAATCAAGGTCAAAATTGGCAACAGCAATTGTGAGGAAATCATTGTTAGGCGAACTGCAAACTACCATCCTACCATTTGGGACTATGATTATGTGCAGTCACTAAGAAGTGATTATGTGGGAGAAACATACACCAGAAGACTTGATAAGCTAAAGAGAGATGTGAAGCCAATGCTTGGCAAAGTGAAGAAGCCTTTGGATCAGCTGGAGCTAATCGATGTCTTGCAAAGGCTTGGAATATATTATCACTTCAAGGATGAAATAAAGAGAATATTGAACAGCATATACAACCAGTACAATCGG…
DRTer14	ATGGCTCTTTCCATGCTTGCTTCAATTCCTAATCTGATCACGCACACAAGACTTCCAATCATAACAAAATCCAGCAGCTGTAAGGCTTCTCCTAGAGGAATCAAGGTCAAAATTGGCAACAGCAATTGTGAGGAAATCACTGTTAGGCGAACTGCAAACTACCAGCCTACCATTTGGGACTATGATTATGTGCGGTCACTTAGAAGTGATTATGTGGGAGAGACATACACCAGAAGACTTGATAAGCTAAAGAGAGATGTGAAGCCAATGCTTGGCAAAGTGAAGAAGCCTTTGGATCAGCTGGAGCTAATCGATGTCTTGCAAAGGCTTGGAATATATTATCACTTCAAGGATGAAATAAAGAGAATATTGAACAGCATATACAACCAGTACAATCGG…
G1Ger01	ATGGCTTTGAATATGAGCAGGTTCGTTACCATGCCTTCACATGTGCTGCCATCTTCCTTTGCCGCTCCTTCACTTCAAGTCTCACCGTCTCCTTGTTCATGGCGGACGCGCCCCTCCCCTTGCACCAGCTGCCATTTATCGCCATCATCATCGTCAAAGCCACTGCTTGGAAGCCATGATTATTCTTTGCTCAAGTCCTTAACTCGATCTCCACATGTGGTGAATTCTGAAGCTGATAGCAGCACCAGAAGGATGGAAGAAGTGAAGGAAAGAACCCGGGAGGCATTCTATAGAGCTTGGGATTCAAGGGCTGCTATGGAGATGGTAGACACAGTTGAGAGGCTAGGTCTATCATACCATTTTGAAGACGAGATAAAAGCACTACTGCAAAGGTTCTGC…
G1Ger02	ATGGCTTTGAATATGAGCAGGTTCGTTACCATGCCTTCACATGTGCTGCCATCTTCCTCTGTCGCTCCTTCACTTCAAGTCTCATCGTCTCCTTGTTCATGGCCGATGCGCCCCTCCCCTTGCACCAGGTGTCATTTATCGCCATCATCATCGTCAAAGCCACTGCTTGGAAGCCATGATTATTCTTTGCTCAAGTCCTTAACTCTATCTCCACATGTGGTGAATTCTGAAGCTGATAGCAGCACCAGAAGGATGAAAGAAGTGAAGGAAAGAACCCGGGAGGCATTCTATAGAGCTTGGGATTCAAGGGCTGCTATGGAGATGGTAGACACAGTTGAGAGGCTAGATCTATCATACCATTTCGAAGGCGAGATAAATGCACTATTGCAAAGGTTCTGC…
G1Ger03	ATGGCTTTGAATATGAGCAGGTTCGTTACCATGCCTTCACATGTGCTGCCATCTTCCTTTGTCGCTCCTTCACTTCAAGTCTCATCGTCTCCTTGTTCATGGCGGACGCGCCCCTCCCCTTGCACCAGCTGCCATTTATCGCCATCATCATCGTCAAAGCCACTGCTTGGAAGCCATGATTATTCTTTGCTCAAGTCCTTAACTCGATCTCCACATGTGGTGAATTCTGAAGCTGATAGCAGCACCAGAAGGATGAAAGAAGTGAAGGAAAGAACCCGGGAGGCATTCTATAGAGCTTGGGATTCAAGGGCTGCTATGGAGATGGTAGACACAGTTGAGAGGCTAGGTCTATCATACCATTTTGAAGACGAGATAAAAGCACTACTGCAAAGGTTCCGC…
G1Ger04	ATGGCTTTGAATATGAGCAGGTTCGTTACCATGCTTTCACATGTGCTGCCATCTTCCTTTGTCACTCCTTCACTTCAAGTCTCATCGTCTCCTTGTTCATGGCGGACGCGCCCCTCCCCTTGCACCAGCTGCCATTTATCGCCATCATCATCGTCAAAGCCACTGCTTGGAAGCCATGATTATTCTTTGCTCAAGTCCTTAACTCGATCTCCACATGTGGTGAATTCTGAAGCTGATAGCAGCACCAGAAGGATGAAAGAAGTGAAGGAAAGAACCCGGGAGGCATTCTATAGAGCTTGGGATTCAAGGGCTGCTATGGAGATGGTAGACACAGTTGAGAGGCTAGGTCTATCATACCATTTTGAAGACGAGATAAAAGCACTACTGCAAAGGTTCTGC…
G1Ger05	ATGGCTTTGAATATGAGCAGGTTCGTTACCATGCCTTCACATGTGCTGCCATCTTCCTTTGTCGCTCCTTCACTTCAAGCCTCATCGTCTCCTTGTTCATGGCGGACGCGCCCCTCCCCTTGCACCAGCTGCCATTTATCGCCATCATCATCGTCAAAGCCACTGCTTGGAAGCCATGATTATTCTTTGCTCAAGTCCTTAACTCTATCTCCACATGCGGTGAATTCTGAAGCTGATAGCAGCACCAGAAGGATGAAAGAAGTGAAGGAAAGAACCTGGGAGGCATTCTATAGAGCTTGGGATTCAAGGGCTGCTATGGAGATGGTAGACACAGTTGAGAGGCTAGGTCTATCATACCATTTTGAAGACGAGATAAATGCACTATTGCAAAGGTTCTGC…
G1Ger06	ATGGCTTTGAATATGAGCAGGTTCGTTACCATGCCTTCACATGTGCTGCCATCTTCCTTTGTCGCTCCTTCACTTCAAGTCTCATCGTCTCCTTGTTCATGGCGGACGCGCCCCTCCCCTTGCACCAGCTGCCATTTATCGCCATCATCATCGTCAAAGCCACTGCTTGGAAGCCATGATTATTCTTTGCTCAAGTCCTTAACTCGATCTCCACATGTGGTGAATTCTGAAGCTGATAGCAGCACCAGAAGGATGAAAGAAGTGAAGGAAAGAACCCGGGAGGCATTCTATAGAGCTTGGGATTCAAGGGCTGCTATGGAGATGGTAGACACAGTTGAGAGGCTAGGTCTATCATACCATTTTGAAGACGAGATAAAAGCACTACTGCAAAGGTTCTGC…
G1Ger07	ATGGCTTTGAATATGAGCAGGTTCGTTACCATGCCTTCACATGTGCTGCCATCTTCCTTTGTCGCTCCTTCACTTCAAGTCTCATCGTCTCCTTGTTCATGGCCGATGCGCCCCTCCCCTTGCACCAGGTGTCATTTATCGCCATCATCATCGTCAAAGCCACTGCTTGGAAGCCATGATTATTCCTTGCTCAAGTCCTTAACTCTATCTCCACATGTGGTGAATTCTGAAGCTGATAGCAGCACCAGAAGGATGAAAGAAGTGAAGGAAAGAACCCGGGAGGCATTCTATAGAGCTTGGGATTCAAGGGCTGCTATGGAGATGGTAGACACAGTTGAGAGGCTAGGTCTATCATACCATTTTGAAGGCGAGATAAATGCACTATTGCAAAGGTTCTGC…
G1Ger08	ATGGCTTTGAATATGAGCAGGTTCGTTACCATGCCTTCACATGTGCTGCCATCTTCCTTTGTCGCTCCTTCACTTCAAGTCTCATCGTCTCCTTGTTCATGGCGGACGCGCCCCTCCCCTTGCACCAGCTGCCATTTATCGCCATCATCATCGTCAAAGCCACTGCTTGGAAGCCATGATTATTCTTTGCTCAAGTCCTTAACTCGATCTCCACATGTGGTGAATTCTGAAGCTGATAGCAGCACCAGAAGGATGAAAGAAGTGAAGGAAAGAACCCGGGAGGCATTCTATAGAGCTTGGGATTCAAGGGCTGCTATGGAGATGGTAGACACAGTTGAGAGGCTAGGTCTATCATACCATTTTGAAGACGAGATAAAAGCACTACTGCAAAGGTTCTGC…
G1Ger09	ATGGCTTTGAATATGAGCAGGTTCGTTACCATGCCTTCACATGTGCTGCCATCTTCCTTTGTCGCTCCTTCACTTCAAGTCTCATCGTCTCCTTGTTCATGGCCGATGCGCCCCTCCCCTTGCACCAGGTGTCATTTATCGCCATCATCATCGTCAAAGCCACTGCTTGGAAGCCATGATTATTCTTTGCTCAAGTCCTTAACTCTATCTCCACATGTGGTGAATTCTGAAGCTGATAGCAGCACCAGAAGGATGAAAGAAGTGAAGGAAAGAACCCGGGAGGCATTCTATAGAGCTTGGGATTCAAGGGCTGCTATGGAGATGGTAGACACAGTTGAGAGGCTAGGTCTATCATACCATTTTGAAGGCGAGATAAATGCACTATTGCAAAGGTTCTGC…
G1Ger10	ATGGCTTTGAATATGAGCAGGTTCGTTACCATGCCTTCACATGTGCTGCCATCTTCCTTTGTCGCTCCTTCACTTCAAGTCTCATCGTCTCCTTGTTCATGGCGGACGCGCCCCTCCCCTTGCACCAGCTGCCATTTATCGCCATCATCATCGTCAAAGCCACTGCTTGGAAGCCATGATTATTCTTTGCTCAAGTCCTTAACTCGATCTCCACATGTGGTGAATTCTGAAGCTGATAGCAGCACCAGAAGGATGAAAGAAGTGAAGGAAAGAACCCGGGAGGCATTCTATAGAGCTTGGGATTCAAGGGCTGCTATGGAGATGGTAGACACAGTTGAGAGGCTAGGTCTATCATACCATTTTGAAGACGAGATAAAAGCACTACTGCAAAGGTTCTGC…
G1Ger11	ATGGCTTTGAATATGAGCAGGTTCGTTACCATGCCTTCACGTGTGCTGCCATCTTCCTTTGTCGCTCCTTCACTTCAAGTCTCATCGTCTCCTTGTTCATGGCGGACGCGCCCCTCCCCTTGCACCAGCTGCCATTTATCGCCATCATCATCGTCAAAGCCACTGCTTGGAAGCCATGATTATTCTTTGCTCAAGTCCTTAACTCGATCTCCACATGTGGTGAATTCTGAAGCTGATAGCAGCACCAGAAGGATGAAAGAAGTGAAGGAAAGAACCCGGGAGGCATTCTATAGAGCTTGGGATTCAAGGGCTGCTATGGAGATGGTAGACACAGTTGAGAGGCTAGGTCTATCATACCATTTTGAAGACGAGATAAAAGCACTACTGCAAAGGTTCTGC…
G1Ger12	ATGGCTTTGAATATGAGCAGGTTCGTTACCATGCCTTCACATGTGCTGCCATCTTCCTTTGTCGCTCCTTCACTTCAAGTCTCATCGTCTCCTTGTTCATGGCCGATGCGCCCCTCCCCTTGCACCAGGTGTCATTTATCGCCATCATCATCGTCAAAGCCACTGCTTGGAAGCCATGATTATTCTTTGCTCAAGTCCTTAACTCTATCTCCACATGTGGTGAATTCTGAAGCTGATAGCAGCACCAGAAGGATGAAAGAAGTGAAGGAAAGAACCCGGGAGGCATTCTATAGAGCTTGGGATTCAAGGGCTGCTATGGAGGTGGTAGACACAGTTGAGAGGCTAGGTCTATCATACCATTTTGAAGACGAGATAAAAGCACTACTGCAAAGGTTCTGC…
G1Ger13	ATGGCTTTGAATATGAGCAGGTTCGTTACCATGCCTTCACATGTGCTGCCATCTTCCTTTGTCGCTCCTTCACTTCAAGTCTCATCGTCTCCTTGTTCATGGCGGACGCGCCCCTCCCCTTGCACCAGCTGCCATTTATCGCCATCATCATCGTCAAAGCCACTGCTTGGAAGCCATGATTATTCTTTGCTCAAGTCCTTAACTCTATCTCCACATGCGGTGAATTCTGAAGCTGATAGCAGCACCAGAAGGATGAAAGAAGTGAAGGAAAGAACCTGGGAGGCATTCTATAGAGCTTGGGATTCAAGGGCTGCTATGGAGATGGTAGACACAGTTGAGAGGCTAGGTCTATCATACCATTTTGAAGACGAGATAAATGCACTATTGCAAAGGTTCTGC…
G1Ger14	ATGGCTTTGAATATGAGCAGGTTCGTTACCATGCCTTCACATGTGCTGCCATCTTCCTTTGTCGCTCCTTCACTTCAAGTCTCATCGTCTCCTTGTTCATGGCGGACGCGCCCCTCCCCTTGCACCAGCTGCCATTTATCGCCATCATCATCGTCAAAGCCACTGCTTGGAAGCCATGATTATTCTTTGCTCAAGTCCTTAACTCGATCTCCACATGTGGTGAATTCTGAAGCTGATAGCAGCACCAGAAGGATGAAAGAAGTGAAGGAAAGAACCCGGGAGGCATTCTATAGAGCTTGGGATTCAAGGGCTGCTATGGAGATGGTAGACACAGTTGAGAGGCTAGGTCTATCATACCATTTTGAAGACGAGATAAAAGCACTACTGCAAAGGTTCTGC…
G1Ger15	ATGGCTTTGAATATGAGCAGGTTCGTTACCATGCCTTCACATGTGCTGCCATCTTCCTTTGTCGCTCTTTCACTTCAAGTCTCATCGTCTCCTTGTTCATGGCCGATGCGCCCCCCCCCTTGCACCAGGTGTCATTTATCGCCATCATCATCGTCAAAGCCACTGCTTGGAAGCCATGATTATTCTTTGCTCAAGTCCTTAACTCTATCTCCACATGTGGTGAATTCTGAAGCTGATAGCAGCACCAGAAGGATGAAAGAAGTGAAGGAAAGAACCCGGGAGGCATTCTATAGAGCTTGGGATTCAAGGGCTGCTATGGAGATGGTAGACACAGTTGAGAGGCTAGGTCTATCATACCATTTTGAAGGCGAGATAAATGCACTATTGCAAAGGTTCTGC…
G1Ger16	ATGGCTTTGAATATGAGCAGGTTCGTTACCATGCCTTCACATGTGCTGCCATCTTCCTTTGTCGCTCCTTCACTTCAAGTCTCATCGTCTCCTTGTTCATGGCGGACGCGCCCCTCCCCTTGCACCAGCTGCCATTTATCGCCATCATCATCGTCAAAGCCACTGCTTGGAAGCCATGATTATTCTTTGCTCAAGTCCTTAACTCGATCTCCACATGTGGTGAATTCTGAAGCTGATAGCAGCACCAGAAGGATGAAAGAAGTGAAGGAAAGAACCCGGGAGGCATTCTATAGAGCTTGGGATTCAAGGGCTGCTATGGAGGTGGTAGACACAGTTGAGAGGCTAGGTCTATCATACCATTTTGAAGACGAGATAAAAGCACTACTGCAAAGGTTCTGC…
G1Ger17	ATGGCTTTGAATATGAGCAGGTTCGTTACCCTGCCTTCACATGTGCTGCCATCTTCCTTTGTCGCTCCTTCACTTCAAGTCTCATCGTCTCCTTGTTCATGGCGGACGCGCCCCTCCCCTTGCACCAGCTGCCATTTATCGCCATCATCATCGTCAAAGCCACTGCTTGGAAGCCATGATTATTCTTTGCTCAAGTCCTTAACTCGATCTCCACATGTGGTGAATTCTGAAGCTGATAGCAGCACCAGAAGGATGAAAGAAGTGAAGGAAAGAACCCGGGAGGCATTCTATAGAGCTTGGGATTCAAGGGCTGCTATGGAGATGGTAGACACAGTTGAGAGGCTAGGTCTATCATACCATTTTGAAGACGAGATAAAAGCACTACTGCAAAGGTTCTGC…
G1Ger18	ATGGCTTTGAATATGAGCAGGTTCGTTACCATGCCTTCACATGTGCTGCCATCTTCCTTTGTCGCTCCTTCACTTCAAGTCTCATCGTCTCCTTGTTCATGGCGGACGCGCCCCTCCCCTTGCACCAGGTGTCATTTATCGCCATCATCATCGTCAAAGCCACTGCTTGGAAGCCATGATTATTCTTTGCTCAAGTCCTTAACTCTATCTCCACATGTGGTGAATTCTGAAGCTGATAGCAGCACCAGAAGGATGAAAGAAGTGAAGGAAAGAACCCGGGAGGCATTCTATAGAGCTTGGGATTCAAGGGCTGCTATGGAGATGGTAGACACAGTTGAGAGGCTAGGTCTATCATACCATTTTGAAGGCGAGATAAATGCACTATTGCAAAGGTTCTGC…
G1Ter01	ATGGCTCTTTCCATGCTTGCTTCAATTCCTAATCTGATCACTCACACAAGACTTCCAATTATGAGAAGATCCAGCAGTTGCAAGGCTTCTCCTCCAGGAAACCAATCCATGATTGGCAACAGCACTTGCGAGGAAATCATTGTTCGGCGTACTGCAAACTACCATCCTCCCATTTGGGACTATGATTATGTGCAATCACTGAGAAGTGATTATGTGGGAGAAATATACACCAGAAGACTTGATAAGCTAAAGAGAGAAGTGAAGCCAATGCTTGGGAAAGTGAAGAAGCCTTTGGATCAGCTGGAGCTAATCGATGTTTTGCAAAGGCTTGGACTATATTATCACTTCAAGGATGCAATAAAGAGAATATTGGACAGCATATACAACCAGTACAATCAG…
G1Ter02	ATGGCTCTTTCCATGCTTGCTTCAATTCCTAATCTGATCACTCACACAAGACTTCCAATTATTAGAAGATCCAGCAGTTGCAAGGCTTCTCCTCCAGGAAACCAATCCATGATTGGCAACAGCACTTGCGAGGAAATCATTGTTCGGCGTACTGCAAACTACCATCCTCCCATTTGGGACTATGATTATGTGCAGTCACTGAGAAGTGATTATGTAGGGGAAACATACACCAGAAGACTTGATAAGCTAAAGAGAGATGTGAAGCCAATGCTTGGGAAAGTGAAGAAGCCTTTGGATCAGCTGGAGCTAATCGATGTTTTGCAAAGGCTTGGACTATATTATCACTTCAAGGATGCAATAAAGAGAATATTGGACAGCATATACAACCAGTACAATCAG…
G1Ter03	ATGGCTCTTTCCATGCTTGCTTCAATTCCTAATCTGATCACTCACACAAGACTTCCAATTATGAGAAGATCCAGCAGTTGCAAGGCTTCTCCTCCAGGAAACCAATCTATGATTGGCAACAGCACTTGCGAGGAAATCATTGTTCGGCGTACTGCAAACTACCATCCTCCCATTTGGGACTATGATTATGTGCAATCACTGAGAAGTGATTATGTGGGAGAAATATACACCAGAAGACTTGATAAGCTAAAGAGAGAAGTGAAGCCAATGCTTGGGAAAGTGAAGAAGCCTTTGGATCAGCTGGAGCTAATCGATGTTTTGCAAAGGCTTGGACTATATTATCACTTCAAGGATGCAATAAAGAGAATATTGGACAGCATATACAACCAGTACAATCAG…
G1Ter04	ATGGCTCTTTCCATGCTTGCTTCAATTCCTATTCTGATCACTCACACAAGACTTCCAATTATGAGAAGATCCAGCAGTTGCAAGGCTTCTCCTCCAGGAAACCAATCCATGATTGGCAACAGCACTTGCGAGGAAATCATTGTTCGGCGTACTGCAAACTACCATCCTCCCATTTGGGACTATGATTATGTGCAGTCACTGAGAAGTGATTATGTGGGAGAAATATACACCAGAAGACTTGATAAGCTAAAGAGAGATGTGAAGCCAATGCTTGGGAGAGTGAAGAAGCCTTTGGATCAGCTGGAGCTAATCGATGTTTTGCAAAGGCTTGGACTATATTATCACTTCAAGGATGCAATAAAGAGAATATTGGACAGCATATACAACCAGTACAATCAG…
G1Ter05	ATGGCTCTTTCCATGCTTGCTTCAATTCCTATTCTGATCACTCACACAAGACTTCCAATTATGAGAAGATCCAGCAGTTGCAAGGCTTCTCCTCCAGGAAACCAATCTATGATTGGCAACAGCACTTGCGAGGAAATCATTGTTCGGCGTACTGCAAACTACCATCCTCCCATTTGGGACTATGATTATGTGCAATCACTGAGAAGTGATTATGTGGGAGAAATATACACCAGAAGACTTGATAAGCTAAAGAGAGAAGTGAAGCCAATGCTTGGGAAAGTGAAGAAGCCTTTGGATCAGCTGGAGCTAATCGATGTTTTGCAAAGGCTTGGACTATATTATCACTTCAAGGATGCAATAAAGAGAATATTGGACAGCATATACAACCAGTACAATCAG…
G1Ter06	ATGGCTCTTTCCATGCTTGCTTCAATTCCTATTCTGATCACTCACACAAGACTTCCAATTATGAGAAGATCCAGCAGTTGCAAGGCTTCTCCTCCAGGAAACCAATCCATGATTGGCAACAGCACTTGCGAGGAAATCATTGTTCGGCGTACTGCAAACTACCATCCTCCCATTTGGGACTATGATTATGTGCAGTCACTGAGAAGTGATTATGTGGGAGAAATATACACCAGAAGACTTGATAAGCTAAAGAGAGATGTGAAGCCAATGCTTGGGAAAGTGAAGAAGCCTTTGGATCAGCTGGAGCTAATCGATGTTTTGCAAAGGCTTGGACTATATTATCACTTCAAGGATGCAATAAAGAGAATATTGGACAGCATATACAACCAGTACAATCAG…
G1Ter07	ATGGCTCTTTCCATGCTTGCTTCAATTCCTAATCTGATCACTCACACAAGACTTCCAATTATGAGAAGATCCAGCAGTTGCAAGGCTTCTCCTCCAGGAAACCAATCTATGATTGGCAACAGCACTTGCGAGGAAATCATTGTTCGGCGTACTGCAAACTACCATCCTCCCATTTGGGACTATGATTATGTGCAATCACTGAGAAGTGATTATGTGGGAGAAATATACACCAGAAGACTTGATAAGCTAAAGAGAGAAGTGAAGCCAATGCTTGGGAAAGTGAAGAAGCCTTTGGATCAGCTGGAGCTAATCGATGTTTTGCAAAGGCTTGGACTATATTATCACTTCAAGGGTGCAATAAAGAGAATATTGGACAGCATATACAACCAGTACAATCAG…
G1Ter08	ATGGCTCTTTCCATGCTTGCTTCAATTCCTAATCTGATCACTCACGCAAGACTTCCAATTATGAGAAGATCCAGCAGTTGCAAGGCTTCTCCTCCAGGAAACCAATCTATGATTGGCAACAGCACTTGCGAGGAAATCATTGTTCGGCGTACTGCAAACTACCATCCTCCCATTTGGGACTATGATTATGTGCAATCACTGAGAAGTGATTATGTGGGAGAAATATACACCAGAAGACTTGATAAGCTAAAGAGAGAAGTGAAGCCAATGCTTGGGAAAGTGAAGAAGCCTTTGGATCAGCTGGAGCTAATCGATGTTTTGCAAAGGCTTGGACTATATTATCACTTCAAGGATGCAATAAAGAGAATATTGGACAGCATATACAACCAGTACAATCAG…
G1Ter09	ATGGCTCTTTCCATGCTTGCTTCAATTCCTAATCTGATCACTCACACAAGACTTCCAATTATGAGAAGATCCAGCAGTTGCAAGGCTTCTCCTCCAGGAAACCAATCTATGATTGGCAACAGCACTTGCGAGGAAATCATTGTTCGGCGTACTGCAAACTACCATCCTCCCATTTGGGACTATGATTATGTGCAATCACTGAGAAGTGATTATGTGGGAGAAATATACACCAGAAGACTTGATAAGCTAAAGAGAGAAGTGAAGCCAATGCTTGGGAAAGTGAAGAAGCCTTTGGATCAGCTGGAGCTAATCGATGTTTTGCAAAGGCTTGGACTATATTATCACTTCAAGGATGCAATAAAGAGAATATTGGACAGCATATACAACCAGTACAATCAG…
G1Ter10	ATGGCTCTTTCCATGCTTGCTTCAATTCCTAATCTGATCACTCACACAAGACTTCCAATTATGAGAAGATCCAGCAGTTGCAAGGCTTCTCCTCCAGGAAACCAATCTATGATTGGCAACAGCACTTGCGAGGAAATCATTGTTCGGCGTACTGCAAACTACCATCCTCCCATTTGGGACTATGATTATGTGCAGTCACTGAGAAGTGATTATGTGGGAGAAATATACACCAGAAGACTTGATAAGCTAAAGAGAGATGTGAAGCCAATGCTTGGGAAAGTGAAGAAGCCTTTGGATCAGCTGGAGCTAATCGATGTTTTGCAAAGGCTTGGACTATATTATCACTTCAAGGATGCAATAAAGAGAATATTGGACAGCATATACAACCAGTACAATCAG…
G1Ter11	ATGGCTCTTTCCATGCTTGCTTCAATTCCTAATCTGATCACTCACACAAGACTTCCAATTATGAGAAGATCCAGCAGTTGCAAGGCTTCTCCTCCAGGAAACCAATCTATGATTGGCAACAGCACTTGCGAGGAAATCATTGTTCGGCGTACTGCAAACTACCATCCTCCCATTTGGGACTATGATTATGTGCAATCACTGAGAAGTGATTATGTGGGAGAAATATACACCAGAAGACTTGATAAGCTAAAGAGAGAAGTGAAGCCAATGCTTGGGAAAGTGAAGAAGCCTTTGGATCAGCTGGAGCTAATCGATGTTTTGCAAAGGCTTGGACTATATTATCACTTCAAGGATGCAATAAAGAGAATATTGGACAGCATATACAACCAGTACAATCAG…
G1Ter12	ATGGCTCTTTCCATGCTTGCTTCAATTCCTATTCTGATCACTCACACAAGACTTCCAATTATGAGAAGATCCAGCAGTTGCAAGGCTTCTCCTCCAGGAAACCAATCCATGATTGGCAACAGCACTTGCGAGGAAATCATTGTTCGGCGTACTGCAAACTACCATCCTCCCATTTGGGACTATGATTATGTGCAGTCACTGAGAAGTGATTATGTGGGAGAAATATACACCAGAAGACTTGATAAGCTAAAGAGAGATGTGAAGCCAATGCTTGGGAAAGTGAAGAAGCCTTTGGATCAGCTGGAGCTAATCGATGTTTTGCAAAGGCTTGGACTATATTATCACTTCAAGGATGCAATAAAGAGAATATTGGACAGCATATACAACCAGTACAATCAG…

## Sheet: S9
Table S9 VvGer and VvTer copy numbers across the mapping population (Deckrot x G1-7720)
Progeny ID	Copy number VvGer	Copy number VvTer
DG_001	1.6	2.7
DG_002	1.5	1.6
DG_007	1.3	1.6
DG_013	1.7	2.3
DG_023	1.8	1.6
DG_028	1.3	2
DG_030	1.4	1.2
DG_032	2.2	1.6
DG_034	1.5	1.2
DG_037	1.6	2.1
DG_038	1.5	0.7
DG_041	1.3	1.9
DG_042	1.6	1.3
DG_046	1.8	1.3
DG_047	1.5	1.6
DG_052	2.1	0.9
DG_055	1.9	1.8
DG_058	1.4	1.9
DG_060	1.7	1.8
DG_062	1.6	1.2
DG_063	1.7	1.8
DG_068	1.8	1.7
DG_071	1.7	1.1
DG_074	1.5	1.3
DG_081	1.5	0.9
DG_082	1.6	0.7
DG_085	1.5	2.2
DG_086	1.6	1.5
DG_087	1.6	1.3
DG_089	1.8	1.8
DG_091	1.7	2.2
DG_094	3.5	1.9
DG_097	1.4	1.7
DG_098	1.8	1.8
DG_100	1.8	1.2
DG_101	1.5	2.1
DG_104	1.3	2.5
DG_105	2.7	2
DG_106	1.6	0.7
DG_110	1.2	1.9
DG_111	1.7	1.1
DG_114	1.6	1.1
DG_115	1.8	1.9
DG_116	1.2	0.8
DG_118	1.6	1.9
DG_122	1.4	2.4
DG_125	1.3	1.7
DG_126	1.4	1.3
DG_127	1.5	1.2
DG_129	1.7	0.8
DG_130	1.7	1.8
DG_135	No data	2.1
DG_141	1.3	1.9
DG_144	12.8	2.8
DG_146	1.6	2.2
DG_149	1.5	1.8
DG_151	1.3	1.7
DG_154	1.4	1.2
DG_155	4	3.4
DG_157	1.4	1.1
DG_166	1.6	2.1
DG_168	1.4	1.8
DG_172	1.7	1.2
DG_173	1.7	2.8
DG_176	1.7	1.1
DG_177	1.5	0.8
DG_179	1.8	4.6
DG_181	1.3	1.6
DG_183	1.4	1.8
DG_184	1.1	1.7
DG_197	9.9	2.2
DG_201	1.1	1.2
DG_205	1.5	1
DG_208	1.7	1.8
DG_212	1.5	1.2
DG_214	1.2	2.4
DG_215	1.4	1.1
DG_222	1.3	1.7
DG_223	2.2	1.1
DG_224	1.6	1
DG_225	No data	2.3
Deckrot	1	1
G1-7720	1.9	2.4

## Sheet: S10
Table S10 VvTer and VvGer genes predicted in Cabernet Sauvignon.
Gene ID	Haplotype	Accession	Best hit in PN40024 v2 (VCost3)	TPS annotation (Martin et al, 2010)	Function
VvCSTer01	VITVvi_vCabSauv08_v1.1.hap2.chr13	VITVvi_vCabSauv08_v1.1_Primary000154F.ver1.0.g537210	Vitvi13g04820	TPS37	Functional
VvCSTer02	VITVvi_vCabSauv08_v1.1.hap2.chr13	VITVvi_vCabSauv08_v1.1_Primary000154F.ver1.0.g537260	Vitvi13g04802	TPS106	Functional
VvCSTer03	VITVvi_vCabSauv08_v1.1.hap1.chr13	VITVvi_vCabSauv08_v1.1_Haplotig000154F_003.ver1.0.g232860	Vitvi13g04802	TPS106	Functional
VvCSTer04	VITVvi_vCabSauv08_v1.1.hap1.chr13	VITVvi_vCabSauv08_v1.1_Haplotig000154F_003.ver1.0.g232900	Vitvi13g01404	TPS38	Functional
VvCSTer05	VITVvi_vCabSauv08_v1.1.hap1.chr13	VITVvi_vCabSauv08_v1.1_Haplotig000283F_005.ver1.0.g246660	Vitvi13g01874	TPS119	Functional
VvCSTer06	VITVvi_vCabSauv08_v1.1.unplaced.113	VITVvi_vCabSauv08_v1.1_Haplotig000544F_001.ver1.0.g253100	Vitvi13g01874	TPS119	Functional
VvCSTer07	VITVvi_vCabSauv08_v1.1.hap2.chr13	VITVvi_vCabSauv08_v1.1_Primary000283F.ver1.0.g587040	Vitvi13g01874	TPS119	Functional
VvCSTer08	VITVvi_vCabSauv08_v1.1.hap1.chr13	VITVvi_vCabSauv08_v1.1_Haplotig000154F_003.ver1.0.g232840	Vitvi13g04802	TPS106	Functional
VvCSTer09	VITVvi_vCabSauv08_v1.1.hap2.chr13	VITVvi_vCabSauv08_v1.1_Primary000774F.ver1.0.g621330	Vitvi13g01874	TPS119	Functional
VvCSTer10	VITVvi_vCabSauv08_v1.1.hap1.chr13	VITVvi_vCabSauv08_v1.1_Haplotig000154F_003.ver1.0.g232810	Vitvi13g01873	TPS116	Non-functional
VvCSTer11	VITVvi_vCabSauv08_v1.1.hap1.chr13	VITVvi_vCabSauv08_v1.1_Haplotig000154F_003.ver1.0.g232870	Vitvi13g04802	TPS106	Non-functional
VvCSTer12	VITVvi_vCabSauv08_v1.1.unplaced.113	VITVvi_vCabSauv08_v1.1_Haplotig000544F_001.ver1.0.g253070	Vitvi13g01874	TPS119	Non-functional
VvCSTer13	VITVvi_vCabSauv08_v1.1.unplaced.113	VITVvi_vCabSauv08_v1.1_Haplotig000544F_001.ver1.0.g253120	Vitvi13g01313	TPS120	Non-functional
VvCSTer14	VITVvi_vCabSauv08_v1.1.unplaced.113	VITVvi_vCabSauv08_v1.1_Haplotig000544F_001.ver1.0.g253130	Vitvi13g01874	TPS119	Non-functional
VvCSTer15	VITVvi_vCabSauv08_v1.1.hap2.chr13	VITVvi_vCabSauv08_v1.1_Primary000283F.ver1.0.g586980	Vitvi13g01874	TPS119	Non-functional
VvCSTer16	VITVvi_vCabSauv08_v1.1.hap2.chr13	VITVvi_vCabSauv08_v1.1_Primary000283F.ver1.0.g587020	Vitvi13g01313	TPS120	Non-functional
VvCSTer17	VITVvi_vCabSauv08_v1.1.hap2.chr13	VITVvi_vCabSauv08_v1.1_Primary000154F.ver1.0.g537200	Vitvi13g01874	TPS119	Non-functional
VvCSTer18	VITVvi_vCabSauv08_v1.1.hap2.chr13	VITVvi_vCabSauv08_v1.1_Primary000154F.ver1.0.g537220	Vitvi13g01313	TPS120	Non-functional
VvCSTer19	VITVvi_vCabSauv08_v1.1.hap2.chr13	VITVvi_vCabSauv08_v1.1_Primary000154F.ver1.0.g537230	Vitvi13g01873	TPS116	Non-functional
VvCSTer20	VITVvi_vCabSauv08_v1.1.hap2.chr13	VITVvi_vCabSauv08_v1.1_Primary000154F.ver1.0.g537270	Vitvi13g04802	TPS106	Functional
VVCSTer21	VITVvi_vCabSauv08_v1.1.hap2.chr13	VITVvi_vCabSauv08_v1.1_Primary000154F.ver1.0.g537280	Vitvi13g04802	TPS106	Non-functional
VvCSTer22	VITVvi_vCabSauv08_v1.1.hap2.chr13	VITVvi_vCabSauv08_v1.1_Primary000154F.ver1.0.g537310	Vitvi13g01404	TPS38	Functional
VvCSTer23	VITVvi_vCabSauv08_v1.1.hap2.chr13	VITVvi_vCabSauv08_v1.1_Primary000774F.ver1.0.g621340	Vitvi13g04820	TPS37	Non-functional
VvCSTer24	VITVvi_vCabSauv08_v1.1.hap2.chr13	VITVvi_vCabSauv08_v1.1_Primary000774F.ver1.0.g621350	Vitvi13g01313	TPS120	Non-functional
VvCSTer25	VITVvi_vCabSauv08_v1.1.hap2.chr13	VITVvi_vCabSauv08_v1.1_Primary000283F.ver1.0.g587030	Vitvi13g04820	TPS37	Non-functional
VvCSTer26	VITVvi_vCabSauv08_v1.1.hap2.chr13	VITVvi_vCabSauv08_v1.1_Primary000283F.ver1.0.g586970	Vitvi13g01314	TPS118	Non-functional
VvCSTer27	VITVvi_vCabSauv08_v1.1.unplaced.113	VITVvi_vCabSauv08_v1.1_Haplotig000544F_001.ver1.0.g253150	Vitvi13g01314	TPS118	Non-functional
VvCSTer27	VITVvi_vCabSauv08_v1.1.unplaced.113	VITVvi_vCabSauv08_v1.1_Haplotig000544F_001.ver1.0.g253150	Vitvi13g01314	TPS118	Non-functional
VvCSTer28	VITVvi_vCabSauv08_v1.1.unplaced.113	VITVvi_vCabSauv08_v1.1_Haplotig000544F_001.ver1.0.g253090	Vitvi13g04820	TPS37	Non-functional
VvCSTer29	VITVvi_vCabSauv08_v1.1.unplaced.113	VITVvi_vCabSauv08_v1.1_Haplotig000544F_001.ver1.0.g253110	Vitvi13g04820	TPS37	Non-functional
VvCSGer01	VITVvi_vCabSauv08_v1.1.hap1.chr12	VITVvi_vCabSauv08_v1.1_Primary000014F.ver1.0.g338250	Vitvi12g02178	TPS52	Functional
VvCSGer02	VITVvi_vCabSauv08_v1.1.hap2.chr12	VITVvi_vCabSauv08_v1.1_Haplotig000014F_027.ver1.0.g087020	Vitvi12g02178	TPS52	Non-functional
VvCSGer03	VITVvi_vCabSauv08_v1.1.unplaced.691	VITVvi_vCabSauv08_v1.1_Haplotig000014F_046.ver1.0.g090780	Vitvi12g02177	TPS51	Non-functional
VvCSGer04	VITVvi_vCabSauv08_v1.1.hap1.chr12	VITVvi_vCabSauv08_v1.1_Primary000363F.ver1.0.g601180	Vitvi12g02178	TPS52	Non-functional
VvCSGer05	VITVvi_vCabSauv08_v1.1.hap2.chr12	VITVvi_vCabSauv08_v1.1_Primary000363F.ver1.0b.g601180	Vitvi12g02178	TPS52	Non-functional
VvCSGer06	VITVvi_vCabSauv08_v1.1.hap1.chr12	VITVvi_vCabSauv08_v1.1_Primary000363F.ver1.0.g601160	Vitvi12g02178	TPS52	Functional
VvCSGer07a	VITVvi_vCabSauv08_v1.1.hap1.chr12	VITVvi_vCabSauv08_v1.1_Primary000014F.ver1.0.g338290	Vitvi12g02177	TPS51	Non-functional
VvCSGer07b	VITVvi_vCabSauv08_v1.1.hap1.chr12	VITVvi_vCabSauv08_v1.1_Primary000014F.ver1.0.g338290	Vitvi12g02177	TPS51	Non-functional
VvCSGer08	VITVvi_vCabSauv08_v1.1.hap1.chr12	VITVvi_vCabSauv08_v1.1_Primary000014F.ver1.0.g338270	Vitvi12g02178	TPS52	Functional
VvCSGer09	VITVvi_vCabSauv08_v1.1.hap2.chr12	VITVvi_vCabSauv08_v1.1_Primary000363F.ver1.0b.g601160	Vitvi12g02178	TPS52	Functional
